# Supplementary material for: Comparative (Computational) Analysis of the DNA Methylation Status of Trinucleotide Repeat Expansion Diseases
Source: J Nucleic Acids. 2013 Dec 23;2013:689798. doi: 10.1155/2013/689798 (PMC3884633; doi:10.1155/2013/689798)
Supplement: Supplementary file 1 — Supplementary material Table 1 shows the all the patterns identified and their location for each CpG site and region. The exact sequence is given as well as the patterns. [file 689798.f1.xlsx]

## Sheet: Filter
pattern	DMPK variably methylated code 0	DMPK never methylated code 1	FMR1 always methylated code 2	FMR1 variably methylated code 3	FXN always methylated CpG sites 1,2,3 code 4	FXN variably methylated CpG sites 4,5,6 code 5	FXN always methylated CpG sites 7,8 code 6	DMPK_variably_methylated_code_0_7_Reversed	DMPK_never_methylated_code_1_8_Reversed	FMR1_always_methylated_code_2__9_Reversed	FMR1_variably_methylated_code_3_10_Reversed	FXN_always_methylated_CpG_sites_1_2_3_code_4_11_Reversed	FXN_variably_methylated_CpG_sites_4_5_6_code_5_12_Reversed	FXN_always_methylated_CpG_sites7_8_code_5_13_Reversed
ccgg[agct]{0,1}	0.0272109	0.0347826	0	0.00714286	0	0.00813008	0	0.0272109	0.00434783	0	0.00714286	0	0.00813008	0
cc[agct]{0,2}c	0.0544218	0.0695652	0.0166359	0.0142857	0.0175439	0.0162602	0	0.047619	0.026087	0.012939	0.0857143	0.0701754	0.00813008	0.0363636
cgga[agct]{0,1}	0	0	0	0	0.0175439	0.00813008	0	0.0170068	0.00434783	0.00369686	0.00714286	0	0.00813008	0
cc[agct]{0,2}a	0.0136054	0.0173913	0.00924214	0.0142857	0.0175439	0.0325203	0	0.0136054	0.026087	0.0147874	0.0214286	0.0350877	0.0406504	0.0181818
a[agct]{0,1}acg	0	0	0.00369686	0	0	0.00813008	0	0	0.00869565	0.00369686	0.00714286	0	0.00813008	0
tata[agct]{0,1}	0	0	0.00554529	0	0	0	0	0	0	0.00554529	0	0	0	0
[agct]{0,1}atct	0	0	0	0	0	0	0	0	0	0.00184843	0	0	0	0
a[agct]{0,1}acc	0	0	0.00369686	0.00714286	0	0	0	0.00340136	0	0.00554529	0.0142857	0	0	0
a[agct]{0,1}aca	0	0	0.00739372	0	0	0	0	0.00340136	0	0.00739372	0.00714286	0.0175439	0.0243902	0
ctga[agct]{0,1}	0.00680272	0.00869565	0.00369686	0.00714286	0	0	0	0	0	0.00184843	0.0285714	0.0175439	0	0
taga[agct]{0,1}	0.00340136	0.00434783	0.00184843	0	0	0	0.0181818	0	0	0	0	0	0	0
[agct]{0,1}atcg	0	0	0.00184843	0	0	0	0	0	0.00434783	0.00369686	0	0	0	0
ata[agct]{0,2}	0	0	0.0166359	0	0	0.00813008	0	0	0.00434783	0.012939	0	0.0175439	0.0162602	0
[agct]{0,1}atcc	0.00340136	0.00434783	0.00184843	0	0.0175439	0	0	0	0.00869565	0.00369686	0	0.0175439	0.00813008	0.0181818
[agct]{0,1}tcct	0.00680272	0.00869565	0	0	0	0	0.0181818	0.00340136	0	0.00739372	0	0	0	0.0363636
[agct]{0,1}atca	0	0	0.00369686	0.00714286	0	0	0	0.00340136	0	0.00184843	0.00714286	0	0	0
ga[agct]{0,1}at	0	0	0.00184843	0	0.0175439	0	0	0	0.00869565	0.00369686	0	0	0	0.0181818
a[agct]{0,1}tgt	0.00340136	0.00434783	0.00369686	0.00714286	0	0.00813008	0	0	0	0.00924214	0	0	0.00813008	0
[agct]{0,1}tccg	0.0170068	0.0217391	0.00369686	0.00714286	0	0.00813008	0	0	0	0	0	0.0175439	0.00813008	0
[agct]{0,1}tccc	0.00340136	0.00434783	0.00184843	0	0.0175439	0.00813008	0	0.0102041	0.0173913	0.00184843	0.0142857	0.0350877	0.00813008	0
[agct]{0,1}tcca	0.00340136	0.00434783	0.00184843	0	0	0.00813008	0	0.00340136	0.00434783	0.00924214	0	0	0	0.0181818
a[agct]{0,1}tgg	0	0	0.00184843	0	0.0175439	0.00813008	0.0181818	0.00680272	0.00434783	0	0	0	0	0.0181818
ga[agct]{0,1}ag	0	0	0.00739372	0.0142857	0	0.00813008	0	0.00340136	0.0173913	0	0	0	0.00813008	0
aca[agct]{0,1}t	0	0	0.00924214	0	0	0.00813008	0	0.00340136	0	0.00369686	0.00714286	0	0.00813008	0
ga[agct]{0,1}ac	0	0	0.00184843	0	0	0.00813008	0	0.00340136	0	0.00554529	0.0214286	0	0	0
a[agct]{0,1}tgc	0.00340136	0.00434783	0.00554529	0	0	0	0.0181818	0.00340136	0	0.00369686	0	0	0	0
a[agct]{0,1}aat	0	0	0.00739372	0	0	0	0.0181818	0	0	0.00369686	0	0	0.00813008	0
ga[agct]{0,1}aa	0	0	0.00554529	0	0	0	0.0181818	0	0	0.0110906	0	0	0	0
a[agct]{0,1}tga	0.00340136	0.00434783	0.00554529	0	0	0	0	0	0	0.00554529	0.0142857	0	0	0
tgct[agct]{0,1}	0	0	0.0110906	0	0	0.00813008	0.0181818	0	0.00434783	0.00739372	0	0	0	0
gggc[agct]{0,1}	0.0170068	0.0217391	0.00184843	0.0285714	0	0	0	0.0306122	0.00869565	0.00184843	0.00714286	0	0.00813008	0
aca[agct]{0,1}g	0	0	0.0110906	0	0	0.00813008	0	0.00680272	0.00869565	0.00554529	0	0.0175439	0.00813008	0
gttc[agct]{0,1}	0.00340136	0.00434783	0.00554529	0.00714286	0	0	0	0.0102041	0	0.00369686	0.00714286	0	0	0
tcgc[agct]{0,1}	0	0	0	0	0	0	0	0.00340136	0.00434783	0.00184843	0	0	0	0
cct[agct]{0,1}t	0.00340136	0.00434783	0.00554529	0	0	0	0	0	0	0.00924214	0.00714286	0	0.00813008	0
aca[agct]{0,1}c	0.00340136	0.00434783	0.00184843	0.0142857	0	0	0	0	0	0.00184843	0	0	0	0
ttct[agct]{0,1}	0	0	0.012939	0	0	0	0	0.00680272	0	0.00369686	0	0	0.00813008	0.0181818
a[agct]{0,1}aag	0.00340136	0.00434783	0.00554529	0	0	0	0.0181818	0.00340136	0.00869565	0.0110906	0	0	0	0
[agct]{0,1}atat	0	0	0.00369686	0	0	0.00813008	0	0	0	0.00369686	0	0	0.00813008	0
aca[agct]{0,1}a	0.00340136	0.00434783	0.00554529	0	0	0	0	0	0	0.00554529	0	0	0.0325203	0
aaat[agct]{0,1}	0	0	0.00554529	0	0	0	0.0181818	0	0.00869565	0.00924214	0	0	0.0162602	0.0181818
gtgc[agct]{0,1}	0.00340136	0.00434783	0.00554529	0	0	0	0.0181818	0.00680272	0.00434783	0.0110906	0	0	0	0
a[agct]{0,1}aac	0.00680272	0.00869565	0.00184843	0	0	0	0	0	0	0.00184843	0	0	0.00813008	0
gct[agct]{0,2}	0.0136054	0.0173913	0.0166359	0.0214286	0.0175439	0.0162602	0.0181818	0.0204082	0.0173913	0.0147874	0.0285714	0	0.00813008	0
a[agct]{0,1}aaa	0	0	0.0110906	0	0	0.00813008	0.0181818	0	0.0130435	0.0221811	0	0	0.0162602	0
ctc[agct]{0,2}	0.0238095	0.0304348	0.012939	0.0214286	0	0.0162602	0	0.0170068	0.00869565	0.0110906	0.0428571	0.0350877	0.0162602	0
ga[agct]{0,2}t	0.00340136	0.00434783	0.0110906	0.00714286	0.0175439	0.00813008	0.0363636	0.0102041	0.00869565	0.00924214	0.00714286	0	0.0162602	0.0181818
cct[agct]{0,1}g	0.0102041	0.0130435	0	0	0	0	0.0181818	0.00340136	0.00434783	0.00369686	0.00714286	0	0	0
cgc[agct]{0,2}	0.047619	0.0608696	0.00554529	0.0214286	0.0350877	0	0.0181818	0.0238095	0.0130435	0.00369686	0.0357143	0.0175439	0	0.0181818
[agct]{0,1}atag	0	0	0.00369686	0	0	0	0	0	0.00434783	0.00369686	0	0	0	0
cct[agct]{0,1}c	0.00340136	0.00434783	0.00184843	0	0.0175439	0	0	0.0102041	0.00869565	0.00554529	0.00714286	0.0350877	0.00813008	0.0181818
tct[agct]{0,2}	0.0102041	0.0130435	0.0203327	0	0	0.00813008	0	0.0102041	0.00434783	0.00554529	0.0214286	0.0350877	0.0162602	0.0181818
cct[agct]{0,1}a	0.00340136	0.00434783	0.00369686	0.00714286	0	0	0	0	0.00434783	0.00739372	0.00714286	0.0175439	0.00813008	0.0181818
ta[agct]{0,2}t	0	0	0.0147874	0	0	0.0243902	0	0	0.00434783	0.0240296	0	0.0175439	0	0.0363636
[agct]{0,1}atac	0	0	0.00554529	0	0	0	0	0	0	0.00184843	0	0.0175439	0	0
[agct]{0,1}tcat	0	0	0.00554529	0	0	0	0	0	0.00434783	0.00739372	0	0	0	0
catt[agct]{0,1}	0	0	0.00184843	0	0	0.00813008	0	0.00340136	0	0.00739372	0	0	0	0.0181818
[agct]{0,1}ataa	0	0	0.00369686	0	0	0	0	0	0	0.00369686	0	0	0.00813008	0
ga[agct]{0,2}g	0.0272109	0.0347826	0.012939	0.0357143	0.0526316	0.0162602	0	0.0170068	0.0304348	0.00739372	0.0142857	0.0175439	0.00813008	0
[agct]{0,2}gtt	0.0102041	0.0130435	0.0203327	0.0428571	0	0.0406504	0.0181818	0.0170068	0.00434783	0.0110906	0.00714286	0	0.0162602	0
[agct]{0,1}aggt	0	0	0.00554529	0	0	0	0	0	0.00434783	0.00369686	0	0	0	0
ga[agct]{0,2}c	0.0170068	0.0217391	0.00924214	0.00714286	0.0175439	0.0162602	0.0181818	0.0204082	0.0130435	0.012939	0.0357143	0.0175439	0	0
c[agct]{0,1}cct	0.00680272	0.00869565	0.00739372	0	0	0	0	0.00680272	0	0.00739372	0.0142857	0.0526316	0	0
ga[agct]{0,2}a	0.00340136	0.00434783	0.0147874	0.0214286	0	0.00813008	0.0181818	0.00680272	0.0173913	0.0277264	0.00714286	0	0.00813008	0
cagt[agct]{0,1}	0.0102041	0.0130435	0.00924214	0.0142857	0	0	0.0181818	0.00680272	0.00434783	0.00184843	0	0	0	0
[agct]{0,1}tcag	0	0	0.00184843	0.0285714	0.0175439	0	0	0.00680272	0.00869565	0.00369686	0.00714286	0	0	0
ta[agct]{0,2}g	0.00340136	0.00434783	0.00924214	0	0.0175439	0	0	0.00680272	0	0.00924214	0	0	0.0162602	0
ta[agct]{0,2}c	0.00340136	0.00434783	0.0110906	0.00714286	0.0175439	0.0162602	0	0	0.00434783	0.012939	0.00714286	0	0.00813008	0.0181818
[agct]{0,1}tcac	0.00680272	0.00869565	0.00739372	0.00714286	0	0	0	0.00340136	0	0.00184843	0.00714286	0	0	0
[agct]{0,2}gtg	0.0136054	0.0173913	0.0184843	0.0214286	0.0175439	0.0243902	0.0363636	0.0204082	0.0173913	0.0295749	0.0142857	0	0.0325203	0
[agct]{0,1}tcaa	0	0	0.00924214	0	0	0	0	0	0	0.00554529	0.00714286	0	0.00813008	0
ta[agct]{0,2}a	0.00340136	0.00434783	0.0203327	0	0.0175439	0	0.0545455	0.00340136	0	0.00924214	0	0.0350877	0.0162602	0
[agct]{0,1}aggg	0.0102041	0.0130435	0.00739372	0.0214286	0.0350877	0	0	0.0102041	0.00869565	0.00554529	0	0.0175439	0	0
c[agct]{0,1}ccg	0.0272109	0.0347826	0.00369686	0.00714286	0.0175439	0.00813008	0	0.0170068	0	0.00184843	0.0214286	0	0.00813008	0.0181818
[agct]{0,2}gtc	0.0204082	0.026087	0.0147874	0.00714286	0	0.00813008	0	0.00680272	0.0130435	0.00739372	0.00714286	0	0	0.0363636
[agct]{0,1}aggc	0	0	0.00369686	0.00714286	0.0175439	0.0243902	0	0.00340136	0.00869565	0.00184843	0.00714286	0	0	0
c[agct]{0,1}ccc	0.0238095	0.0304348	0.00369686	0.00714286	0	0	0	0.00680272	0.00869565	0.00184843	0.0357143	0.0175439	0	0
[agct]{0,2}gta	0.00340136	0.00434783	0.0110906	0	0.0350877	0.00813008	0	0	0.00434783	0.0166359	0.00714286	0.0175439	0.00813008	0
[agct]{0,1}agga	0.00340136	0.00434783	0.00739372	0	0	0	0.0363636	0.00680272	0.00434783	0	0	0	0	0.0181818
c[agct]{0,1}cca	0.00340136	0.00434783	0.00369686	0	0	0	0	0.00680272	0.00869565	0	0	0	0	0
[agct]{0,2}agt	0.0136054	0.0173913	0.0240296	0.0142857	0.0175439	0.00813008	0.0363636	0.0136054	0.00869565	0.0147874	0	0	0.0243902	0.0181818
caag[agct]{0,1}	0	0	0.00554529	0	0	0.00813008	0	0.00340136	0.00434783	0.00184843	0	0	0	0
actg[agct]{0,1}	0.00680272	0.00869565	0.00184843	0	0	0	0	0.0102041	0	0.00924214	0.0142857	0	0	0.0181818
[agct]{0,2}agg	0.0136054	0.0173913	0.025878	0.0285714	0.0526316	0.0243902	0.0363636	0.0204082	0.026087	0.0110906	0.00714286	0.0175439	0	0.0181818
gcaa[agct]{0,1}	0	0	0.00369686	0	0	0	0	0	0.00869565	0.00554529	0	0	0.00813008	0
[agct]{0,2}agc	0.0204082	0.026087	0.0147874	0.0285714	0	0.00813008	0	0.0136054	0.0217391	0.0166359	0.0214286	0.0175439	0.0162602	0.0181818
[agct]{0,2}aga	0.0102041	0.0130435	0.00554529	0.0214286	0.0350877	0.0162602	0.0181818	0.0102041	0.0304348	0.0203327	0	0	0.00813008	0
acgg[agct]{0,1}	0.00680272	0.00869565	0.00184843	0	0	0	0	0.00340136	0.00869565	0.00184843	0.00714286	0	0	0
gccg[agct]{0,1}	0.0272109	0.0347826	0	0.0142857	0.0175439	0	0	0.0170068	0.00434783	0.00184843	0.00714286	0	0	0
c[agct]{0,1}cat	0	0	0.00554529	0	0.0175439	0.00813008	0	0	0.00434783	0.00184843	0	0	0	0
a[agct]{0,1}tct	0.00340136	0.00434783	0.00184843	0	0	0	0	0.00340136	0	0	0	0.0175439	0	0
cca[agct]{0,2}	0.0238095	0.0304348	0.00739372	0	0	0.0406504	0.0181818	0.0170068	0.026087	0.0184843	0.00714286	0.0350877	0.0243902	0.0545455
c[agct]{0,1}cag	0.0136054	0.0173913	0.00924214	0.0214286	0	0	0	0.00680272	0.0130435	0.00554529	0.00714286	0	0	0
aacc[agct]{0,1}	0.00680272	0.00869565	0.00184843	0	0	0	0	0.00340136	0.00434783	0.00369686	0.0214286	0	0.00813008	0
c[agct]{0,1}cac	0.0102041	0.0130435	0.00739372	0	0	0.0243902	0	0.00340136	0	0.00184843	0	0	0	0
a[agct]{0,1}tcg	0	0	0.00184843	0	0	0	0	0.00340136	0	0.00369686	0	0	0	0
c[agct]{0,1}caa	0.00340136	0.00434783	0.00369686	0	0	0	0	0.00340136	0.00434783	0.00369686	0	0	0.0243902	0
a[agct]{0,1}tcc	0.00680272	0.00869565	0	0	0	0	0	0.00340136	0	0.00554529	0	0	0.0162602	0.0363636
a[agct]{0,1}tca	0.00340136	0.00434783	0.00369686	0.00714286	0	0	0	0.00340136	0	0.00554529	0	0	0	0
caa[agct]{0,1}t	0.00340136	0.00434783	0.0110906	0	0	0	0	0	0.00434783	0.00924214	0	0	0.0162602	0
ggtt[agct]{0,1}	0.00340136	0.00434783	0.00369686	0.0214286	0	0.00813008	0	0.00680272	0	0.00184843	0	0	0	0
tg[agct]{0,3}	0.047619	0.0608696	0.0739372	0.0428571	0.0526316	0.0894309	0.0545455	0.047619	0.0695652	0.0850277	0.0571429	0.0350877	0.0650407	0.0181818
tctt[agct]{0,1}	0.00340136	0.00434783	0.00739372	0	0	0	0	0.00340136	0	0.00184843	0.00714286	0	0.0162602	0
aac[agct]{0,2}	0.0170068	0.0217391	0.0110906	0.00714286	0	0.0162602	0	0.0102041	0.0130435	0.0203327	0.0428571	0	0.0406504	0.0181818
act[agct]{0,1}t	0.00340136	0.00434783	0.00184843	0	0	0.0162602	0	0	0.00434783	0.0110906	0	0.0175439	0	0.0181818
caa[agct]{0,1}g	0	0	0.00554529	0	0	0	0	0.00680272	0.00434783	0.00184843	0.00714286	0	0.0162602	0
acg[agct]{0,1}t	0	0	0.00369686	0	0	0	0	0.00340136	0.00869565	0	0.00714286	0	0	0
caa[agct]{0,1}c	0.00340136	0.00434783	0	0	0	0.00813008	0	0.00340136	0	0.00369686	0	0	0.0325203	0
gcc[agct]{0,1}t	0	0	0.00184843	0	0	0.00813008	0	0.00340136	0.00434783	0.00369686	0.00714286	0.0175439	0	0
caa[agct]{0,1}a	0	0	0	0	0	0	0	0	0.00869565	0.00184843	0	0	0.00813008	0
[agct]{0,1}agct	0.00340136	0.00434783	0.00554529	0.00714286	0	0	0	0.00340136	0.00434783	0.00554529	0.00714286	0	0	0
act[agct]{0,1}g	0	0	0.00184843	0	0	0	0	0.00680272	0	0.00554529	0	0	0	0.0181818
a[agct]{0,1}tat	0	0	0.00369686	0	0	0	0	0	0	0.00184843	0	0	0.00813008	0
act[agct]{0,1}c	0.00340136	0.00434783	0.00554529	0	0	0.00813008	0	0.00340136	0	0.00184843	0	0	0.00813008	0
agca[agct]{0,1}	0	0	0.00739372	0	0	0	0	0	0.0130435	0.0110906	0	0	0.00813008	0.0181818
act[agct]{0,1}a	0.00680272	0.00869565	0.00554529	0	0	0	0.0181818	0.00340136	0	0.00554529	0.0142857	0	0	0
acg[agct]{0,1}g	0.00340136	0.00434783	0.00369686	0.0142857	0	0.00813008	0.0181818	0.00340136	0	0.00369686	0.00714286	0	0.0162602	0
gcc[agct]{0,1}g	0.0340136	0.0434783	0	0.0142857	0	0	0	0.0136054	0.0173913	0.00554529	0.0142857	0	0.00813008	0.0181818
[agct]{0,1}agcg	0.00680272	0.00869565	0.00184843	0.0142857	0	0	0	0.00680272	0	0	0.00714286	0	0	0
acg[agct]{0,1}c	0.00680272	0.00869565	0	0	0.0175439	0.00813008	0	0	0.00869565	0.00184843	0.00714286	0	0	0
gt[agct]{0,2}t	0.0136054	0.0173913	0.00924214	0.0142857	0.0175439	0.0406504	0.0181818	0.0102041	0.00869565	0.0184843	0.00714286	0	0	0.0363636
acg[agct]{0,1}a	0	0	0.00184843	0	0	0	0	0	0.00434783	0.00369686	0.00714286	0	0	0
gcc[agct]{0,1}c	0.0170068	0.0217391	0.00184843	0.00714286	0.0175439	0.00813008	0	0.0238095	0.00434783	0.00184843	0.0142857	0.0175439	0.00813008	0.0181818
[agct]{0,1}agcc	0.0102041	0.0130435	0	0.00714286	0	0.00813008	0	0.00340136	0.00434783	0	0.00714286	0.0175439	0.00813008	0
g[agct]{0,2}tt	0.00680272	0.00869565	0.0147874	0.0357143	0.0175439	0.0487805	0.0545455	0.0136054	0.0130435	0.0110906	0	0.0175439	0.00813008	0
gcc[agct]{0,1}a	0.0170068	0.0217391	0.00184843	0.00714286	0	0.00813008	0	0	0.00869565	0.00184843	0.00714286	0	0.0162602	0
a[agct]{0,1}tag	0	0	0.00184843	0	0.0175439	0	0	0	0	0.00554529	0	0	0	0
[agct]{0,1}agca	0	0	0.00739372	0	0	0	0	0	0.0130435	0.0110906	0	0	0.00813008	0.0181818
gact[agct]{0,1}	0.00680272	0.00869565	0.00184843	0	0	0	0.0181818	0.00680272	0	0.00369686	0.00714286	0	0	0
[agct]{0,1}gcgt	0.00340136	0.00434783	0	0.00714286	0	0	0	0.00340136	0.00869565	0.00184843	0	0.0175439	0	0.0181818
gg[agct]{0,2}t	0.0136054	0.0173913	0.012939	0.0428571	0.0175439	0.0325203	0.0363636	0.0170068	0.026087	0.00924214	0.0142857	0.0350877	0.0162602	0
a[agct]{0,1}tac	0	0	0.00369686	0	0	0	0	0	0	0.00184843	0	0.0175439	0.00813008	0
a[agct]{0,1}taa	0	0	0.00554529	0	0	0	0	0	0.00434783	0.00184843	0	0	0.00813008	0
tgaa[agct]{0,1}	0.00340136	0.00434783	0.00554529	0.00714286	0	0.00813008	0	0.00340136	0	0.00739372	0.00714286	0.0175439	0	0
tt[agct]{0,2}t	0.00340136	0.00434783	0.0406654	0.00714286	0	0.0406504	0.0181818	0	0.00434783	0.025878	0	0	0.0162602	0.0181818
[agct]{0,2}act	0.0136054	0.0173913	0.0147874	0	0	0.0243902	0.0181818	0.0136054	0.00434783	0.0240296	0.0142857	0.0175439	0.00813008	0.0363636
gt[agct]{0,2}g	0.0170068	0.0217391	0.0184843	0.0142857	0.0175439	0.0162602	0.0181818	0.0170068	0.026087	0.0147874	0	0	0.0243902	0
t[agct]{0,2}tt	0.00340136	0.00434783	0.0406654	0.0142857	0	0.0487805	0.0181818	0	0	0.025878	0	0	0.0162602	0
a[agct]{0,1}ggt	0.00340136	0.00434783	0.00554529	0	0	0	0	0.00340136	0.00434783	0.00184843	0	0	0	0
g[agct]{0,2}tg	0.0238095	0.0304348	0.0184843	0.00714286	0.0526316	0.0325203	0	0.0136054	0.0347826	0.0147874	0.0214286	0	0.0243902	0
tgcg[agct]{0,1}	0	0	0	0	0	0	0	0.00340136	0.00869565	0.00184843	0.00714286	0.0175439	0	0
gt[agct]{0,2}c	0.0136054	0.0173913	0.00924214	0.0285714	0.0175439	0.00813008	0.0181818	0.00680272	0	0.012939	0.0142857	0.0175439	0.0162602	0
tg[agct]{0,2}t	0.0136054	0.0173913	0.0240296	0.0142857	0.0350877	0.0325203	0.0363636	0.00340136	0.00869565	0.0166359	0.00714286	0	0.0162602	0
[agct]{0,1}gcgg	0.00680272	0.00869565	0	0.0214286	0.0175439	0	0.0181818	0.0340136	0	0.00184843	0.0142857	0.0175439	0	0
gt[agct]{0,2}a	0.00340136	0.00434783	0.0295749	0.0142857	0	0.00813008	0	0.0102041	0.00434783	0.0184843	0.0142857	0	0.0162602	0
g[agct]{0,2}tc	0.0204082	0.026087	0.012939	0.0357143	0.0175439	0	0	0.0170068	0.00869565	0.00924214	0.00714286	0.0175439	0.0162602	0.0181818
gg[agct]{0,2}g	0.0340136	0.0434783	0.0147874	0.0714286	0.0701754	0.0162602	0.0545455	0.0612245	0.0391304	0.012939	0.0142857	0	0.0162602	0
ttaa[agct]{0,1}	0	0	0.00554529	0	0	0.00813008	0.0181818	0	0	0.00554529	0	0	0.00813008	0.0181818
g[agct]{0,2}ta	0	0	0.012939	0.00714286	0	0.00813008	0.0181818	0.00340136	0.00434783	0.0110906	0.00714286	0.0175439	0.0162602	0
[agct]{0,1}gcgc	0.0102041	0.0130435	0.00184843	0.00714286	0	0	0	0.0102041	0.00434783	0.00184843	0.00714286	0	0	0
tt[agct]{0,2}g	0.00340136	0.00434783	0.012939	0.0285714	0.0350877	0.0569106	0.0181818	0.0102041	0.00869565	0.00924214	0	0.0175439	0.00813008	0.0181818
gg[agct]{0,2}c	0.0680272	0.0869565	0.0184843	0.05	0.0350877	0.00813008	0	0.0646259	0.0173913	0.0110906	0.0285714	0.0175439	0.00813008	0
[agct]{0,2}acg	0.0102041	0.0130435	0.00924214	0.0142857	0.0175439	0.0162602	0.0181818	0.00680272	0.0217391	0.00924214	0.0285714	0	0.0162602	0
[agct]{0,1}gcga	0.00340136	0.00434783	0.00184843	0	0	0	0	0	0.00434783	0	0	0	0	0
gaa[agct]{0,2}	0.0238095	0.0304348	0.0203327	0.0142857	0.0350877	0.0243902	0.0181818	0.00680272	0.026087	0.0221811	0.0285714	0.0175439	0.00813008	0.0181818
gg[agct]{0,2}a	0.0170068	0.0217391	0.012939	0.0142857	0.0526316	0.00813008	0	0.0170068	0.00434783	0.00739372	0	0	0.0243902	0.0181818
t[agct]{0,2}tg	0.00680272	0.00869565	0.00924214	0	0	0.0243902	0.0181818	0.0102041	0.00869565	0.0166359	0	0	0	0.0181818
a[agct]{0,1}ggg	0.0102041	0.0130435	0.00554529	0.00714286	0.0526316	0	0	0.00680272	0	0.00554529	0	0.0175439	0	0
tt[agct]{0,2}c	0.00340136	0.00434783	0.025878	0.00714286	0	0.0162602	0.0181818	0.0102041	0.0347826	0.0203327	0.00714286	0	0	0.0181818
[agct]{0,2}acc	0.0136054	0.0173913	0.012939	0.00714286	0	0	0	0.0170068	0.00434783	0.0147874	0.0214286	0.0175439	0.00813008	0.0181818
ttcg[agct]{0,1}	0.00340136	0.00434783	0	0.0142857	0	0	0	0.00680272	0	0.00184843	0	0	0	0
tt[agct]{0,2}a	0.0102041	0.0130435	0.0147874	0.0142857	0	0.0325203	0.0363636	0.0102041	0.00434783	0.0277264	0	0	0.0243902	0.0545455
[agct]{0,2}aca	0.00680272	0.00869565	0.0277264	0.0142857	0	0.0162602	0	0.0102041	0.00869565	0.0184843	0.00714286	0.0175439	0.0487805	0
tg[agct]{0,2}g	0.0102041	0.0130435	0.00924214	0.0142857	0	0.0162602	0	0.0102041	0.0173913	0.0166359	0.0142857	0.0350877	0.0162602	0
t[agct]{0,2}tc	0.00680272	0.00869565	0.0277264	0.00714286	0	0.00813008	0	0.00340136	0.00869565	0.0147874	0.0214286	0	0.00813008	0.0181818
a[agct]{0,1}ggc	0.00340136	0.00434783	0.00369686	0.00714286	0.0175439	0	0	0	0.0130435	0.00184843	0	0	0.00813008	0
t[agct]{0,2}ta	0.00340136	0.00434783	0.00924214	0	0.0350877	0.0162602	0	0.00340136	0	0.0203327	0	0.0175439	0	0.0545455
a[agct]{0,1}gga	0.00340136	0.00434783	0.00739372	0.00714286	0	0	0.0181818	0.00680272	0.00869565	0.00184843	0.00714286	0.0175439	0	0
gcg[agct]{0,2}	0.0238095	0.0304348	0.00369686	0.0357143	0.0175439	0	0.0181818	0.047619	0.0173913	0.00554529	0.0214286	0.0350877	0	0.0181818
tg[agct]{0,2}c	0.0136054	0.0173913	0.0147874	0.0142857	0	0.0243902	0	0.0272109	0.026087	0.025878	0.0214286	0	0.0243902	0
taa[agct]{0,2}	0	0	0.0147874	0	0	0.00813008	0.0181818	0	0.00434783	0.0147874	0.00714286	0.0175439	0.0243902	0.0545455
tg[agct]{0,2}a	0.0102041	0.0130435	0.025878	0	0.0175439	0.0162602	0.0181818	0.00680272	0.0173913	0.025878	0.0142857	0	0.00813008	0.0181818
tcg[agct]{0,2}	0.00680272	0.00869565	0.00554529	0.0142857	0	0	0	0.0136054	0.00434783	0.00739372	0.00714286	0	0	0
[agct]{0,1}agat	0	0	0.00184843	0	0.0175439	0	0	0	0.00434783	0	0	0	0	0
catg[agct]{0,1}	0	0	0.00554529	0	0.0175439	0	0	0	0.00434783	0.00554529	0	0.0175439	0	0
cagg[agct]{0,1}	0.00340136	0.00434783	0.00554529	0.00714286	0	0.00813008	0.0181818	0.0102041	0.0173913	0.00184843	0	0	0	0.0181818
[agct]{0,2}tgt	0.0102041	0.0130435	0.0166359	0.00714286	0.0175439	0.0487805	0	0.00680272	0.00434783	0.0277264	0.0142857	0	0.0162602	0
gcta[agct]{0,1}	0	0	0.00554529	0	0	0	0	0.00680272	0	0.00369686	0	0	0	0
[agct]{0,1}agag	0	0	0	0.0214286	0.0175439	0.00813008	0	0	0.00869565	0.00184843	0	0	0.00813008	0
[agct]{0,1}agac	0.00340136	0.00434783	0	0	0	0	0	0.0102041	0.00434783	0.00554529	0	0	0	0
gcga[agct]{0,1}	0.00340136	0.00434783	0.00184843	0	0	0	0	0	0.00434783	0	0	0	0	0
g[agct]{0,1}att	0	0	0.00184843	0	0.0175439	0.00813008	0.0181818	0	0	0.00184843	0	0	0	0
[agct]{0,1}agaa	0.00680272	0.00869565	0.00369686	0	0	0.00813008	0.0181818	0	0.0130435	0.012939	0	0	0	0
[agct]{0,2}tgg	0.0170068	0.0217391	0.0184843	0.00714286	0.0350877	0.0243902	0.0545455	0.0238095	0.026087	0.00739372	0	0	0.0406504	0.0181818
[agct]{0,2}tgc	0.00680272	0.00869565	0.0184843	0	0	0.00813008	0.0181818	0.0102041	0.0347826	0.025878	0.00714286	0.0175439	0.00813008	0.0181818
[agct]{0,2}aat	0.00340136	0.00434783	0.0147874	0	0	0	0.0181818	0	0.00869565	0.012939	0	0.0175439	0.0325203	0.0181818
[agct]{0,2}tga	0.0102041	0.0130435	0.0184843	0.0214286	0	0.00813008	0	0.00680272	0.00434783	0.0240296	0.0357143	0.0175439	0	0
g[agct]{0,1}atg	0.00340136	0.00434783	0.00554529	0	0.0175439	0	0	0	0.00434783	0.00554529	0	0	0	0
g[agct]{0,1}atc	0	0	0.00369686	0	0.0175439	0	0	0.00340136	0	0.00369686	0	0.0175439	0	0
g[agct]{0,1}ata	0	0	0.00369686	0	0	0	0	0	0	0.00184843	0	0	0	0
[agct]{0,2}aag	0.0102041	0.0130435	0.025878	0.00714286	0.0175439	0.0243902	0.0181818	0.00680272	0.026087	0.0184843	0	0.0175439	0.0325203	0.0363636
ag[agct]{0,1}gt	0.00680272	0.00869565	0.00554529	0.0142857	0.0175439	0	0	0.00340136	0	0.00184843	0	0	0	0
cgat[agct]{0,1}	0	0	0.00369686	0	0	0	0	0	0.00434783	0.00184843	0	0	0	0
[agct]{0,2}aac	0.0170068	0.0217391	0.0110906	0.00714286	0	0.0162602	0	0.0102041	0.0130435	0.0221811	0.0428571	0	0.0325203	0.0181818
tgc[agct]{0,1}t	0	0	0.00369686	0	0	0	0.0181818	0	0.00869565	0.00554529	0	0	0.00813008	0
[agct]{0,2}aaa	0	0	0.0314233	0	0	0.0162602	0.0727273	0	0.0304348	0.0406654	0.0214286	0	0.0487805	0.0181818
at[agct]{0,1}gt	0	0	0.00184843	0	0	0.00813008	0	0	0.00434783	0.00554529	0	0	0	0
ag[agct]{0,1}gg	0.00680272	0.00869565	0.00369686	0.0214286	0.0526316	0.00813008	0	0.00680272	0	0.00554529	0	0	0	0
ctat[agct]{0,1}	0	0	0.00369686	0	0	0	0	0	0	0.00369686	0	0	0	0
taat[agct]{0,1}	0	0	0	0	0	0	0	0	0	0.00184843	0	0.0175439	0	0
ttc[agct]{0,1}t	0	0	0.00924214	0	0	0	0.0181818	0	0	0.00924214	0	0	0.00813008	0
ag[agct]{0,1}gc	0.00340136	0.00434783	0.00369686	0.00714286	0	0	0.0181818	0.00340136	0.0130435	0.00184843	0.00714286	0	0.00813008	0
tgc[agct]{0,1}g	0	0	0.00184843	0	0	0	0	0.00680272	0.00869565	0.00369686	0.00714286	0.0175439	0	0
aaa[agct]{0,1}t	0	0	0.00739372	0	0	0.0162602	0.0363636	0	0.00434783	0.00739372	0	0	0.0243902	0
ag[agct]{0,1}ga	0.00340136	0.00434783	0.00369686	0.0214286	0	0	0	0.00340136	0.00434783	0	0	0.0175439	0	0
tgc[agct]{0,1}c	0.00340136	0.00434783	0.00554529	0	0	0.00813008	0	0.00340136	0.0130435	0.00554529	0	0	0	0
tgc[agct]{0,1}a	0.00340136	0.00434783	0.00739372	0	0	0	0	0	0.00434783	0.0110906	0	0	0	0.0181818
at[agct]{0,1}gg	0	0	0.00184843	0	0	0.00813008	0	0	0.00434783	0.00369686	0	0	0	0
at[agct]{0,1}gc	0	0	0	0	0	0	0	0	0.00434783	0.00369686	0	0	0.00813008	0
ttc[agct]{0,1}g	0	0	0.00369686	0.0214286	0.0175439	0	0	0.00680272	0	0.00369686	0	0.0175439	0	0
at[agct]{0,1}ga	0	0	0.00554529	0	0	0	0.0181818	0	0.00434783	0.00184843	0	0	0	0
aaa[agct]{0,1}g	0	0	0.00924214	0	0	0	0.0363636	0	0.00869565	0.00739372	0.00714286	0	0	0
cc[agct]{0,1}tt	0.00340136	0.00434783	0.00184843	0.00714286	0.0175439	0	0	0.00680272	0	0.00739372	0	0.0175439	0	0.0181818
ttc[agct]{0,1}c	0.00340136	0.00434783	0.00739372	0	0	0.00813008	0	0.00680272	0.00869565	0.00369686	0.00714286	0	0	0
cat[agct]{0,1}t	0	0	0.00184843	0	0.0175439	0.00813008	0	0	0	0.00739372	0	0	0	0.0181818
ttc[agct]{0,1}a	0.00340136	0.00434783	0.00184843	0	0	0	0	0.0102041	0	0.00369686	0	0	0.00813008	0.0181818
aaa[agct]{0,1}c	0	0	0.00369686	0	0	0	0	0	0.00869565	0.00739372	0.0142857	0	0	0.0181818
aaa[agct]{0,1}a	0	0	0.0110906	0	0	0.00813008	0	0	0.00869565	0.0184843	0.00714286	0	0.0243902	0
cag[agct]{0,1}t	0.00680272	0.00869565	0.00554529	0.00714286	0	0	0	0.00340136	0.00434783	0.00369686	0	0	0	0
[agct]{0,1}gcct	0.00340136	0.00434783	0.00184843	0.00714286	0	0	0	0	0.0173913	0.00369686	0.00714286	0.0175439	0.0243902	0
cc[agct]{0,1}tg	0.00680272	0.00869565	0.00184843	0	0	0	0	0.00340136	0	0.00924214	0	0	0	0
cat[agct]{0,1}g	0	0	0.00554529	0	0	0.00813008	0	0	0	0.00184843	0	0	0	0
cc[agct]{0,1}tc	0	0	0.00554529	0	0.0175439	0	0	0.0102041	0.00869565	0.00184843	0.0214286	0.0350877	0	0
agc[agct]{0,2}	0.0204082	0.026087	0.0147874	0.0285714	0	0.00813008	0	0.0136054	0.0217391	0.0166359	0.0214286	0.0175439	0.0162602	0.0181818
a[agct]{0,1}gct	0	0	0.00554529	0	0	0.00813008	0	0.00340136	0.00869565	0.00184843	0.00714286	0	0	0
cc[agct]{0,1}ta	0.00680272	0.00869565	0.00184843	0	0	0.00813008	0	0	0	0.00369686	0	0.0175439	0	0
cat[agct]{0,1}c	0	0	0.00554529	0	0	0	0	0.00340136	0.00869565	0.00554529	0	0.0175439	0	0
t[agct]{0,1}cgt	0	0	0.00369686	0.00714286	0	0	0	0	0.00434783	0.00184843	0	0	0	0
cat[agct]{0,1}a	0	0	0.00369686	0	0	0	0	0	0	0.00369686	0	0	0	0
cag[agct]{0,1}g	0	0	0.00554529	0.0214286	0.0175439	0	0.0181818	0.00340136	0.0173913	0.00369686	0	0	0	0
[agct]{0,1}gccg	0.0272109	0.0347826	0	0.0142857	0.0175439	0	0	0.0170068	0.00434783	0.00184843	0.00714286	0	0	0
cag[agct]{0,1}c	0.00680272	0.00869565	0.00184843	0.0142857	0	0.00813008	0	0.0102041	0.0173913	0.00739372	0.00714286	0.0175439	0	0
[agct]{0,1}gccc	0.0306122	0.0391304	0.00184843	0.00714286	0	0.00813008	0	0.0170068	0.00869565	0.00184843	0.0285714	0	0	0
cag[agct]{0,1}a	0.00680272	0.00869565	0.00924214	0	0	0	0.0181818	0.00340136	0	0.00369686	0	0	0	0.0181818
[agct]{0,1}gcca	0.00680272	0.00869565	0.00184843	0	0	0.0162602	0	0.00680272	0.00434783	0.00554529	0	0.0175439	0.00813008	0.0181818
a[agct]{0,1}gcg	0	0	0.00369686	0.00714286	0.0175439	0	0.0181818	0.00340136	0	0.00369686	0	0.0175439	0	0
t[agct]{0,1}cgg	0.00680272	0.00869565	0	0.0142857	0	0.00813008	0	0.00340136	0	0.00184843	0.00714286	0.0175439	0.00813008	0
a[agct]{0,1}gcc	0.00680272	0.00869565	0	0	0.0175439	0.0162602	0	0	0.00434783	0	0.00714286	0	0.00813008	0
t[agct]{0,1}cgc	0.00680272	0.00869565	0.00184843	0	0.0175439	0	0	0.00340136	0	0	0	0.0175439	0	0
a[agct]{0,1}gca	0	0	0.00554529	0	0	0.00813008	0	0	0.0173913	0.00369686	0	0	0	0.0181818
ggtg[agct]{0,1}	0.00340136	0.00434783	0.00554529	0	0	0	0.0181818	0.00680272	0.00869565	0.00739372	0.00714286	0	0	0
t[agct]{0,1}cga	0.00680272	0.00869565	0	0	0	0	0	0.00340136	0.00434783	0	0	0	0	0
tctg[agct]{0,1}	0.00340136	0.00434783	0.00924214	0	0	0	0	0.00340136	0.00434783	0.00184843	0	0.0175439	0	0
gggg[agct]{0,1}	0.0170068	0.0217391	0.00184843	0.05	0.0350877	0	0	0.0102041	0.00869565	0.00554529	0	0	0	0
gttg[agct]{0,1}	0.00680272	0.00869565	0.00739372	0.00714286	0	0.00813008	0	0.00680272	0	0.00369686	0	0	0	0
tcgg[agct]{0,1}	0	0	0.00184843	0.0142857	0	0	0	0.00340136	0	0.00369686	0.00714286	0	0	0
tgga[agct]{0,1}	0.00340136	0.00434783	0.00924214	0	0	0	0.0181818	0.00340136	0.00869565	0.00184843	0	0	0.00813008	0
ttta[agct]{0,1}	0	0	0.00554529	0.00714286	0	0.00813008	0	0	0	0.00554529	0	0	0.00813008	0.0181818
[agct]{0,2}tct	0.0102041	0.0130435	0.0203327	0	0	0.00813008	0	0.0102041	0.00434783	0.00554529	0.0214286	0.0175439	0.0162602	0.0181818
gta[agct]{0,2}	0.00340136	0.00434783	0.0110906	0	0.0350877	0.00813008	0	0	0.00434783	0.0166359	0.00714286	0.0175439	0.00813008	0
ttga[agct]{0,1}	0	0	0.00554529	0.00714286	0	0.00813008	0	0	0	0.00924214	0	0	0	0
a[agct]{0,3}t	0.0204082	0.026087	0.064695	0.0142857	0.0175439	0.0894309	0.0545455	0.0204082	0.0478261	0.064695	0.0142857	0.0175439	0.0894309	0.0545455
gaaa[agct]{0,1}	0	0	0.00924214	0	0	0.0162602	0.0181818	0	0.0173913	0.00924214	0.0214286	0	0	0.0181818
gga[agct]{0,2}	0.0170068	0.0217391	0.0184843	0.0142857	0.0526316	0.0162602	0.0545455	0.0306122	0.0173913	0.00739372	0.00714286	0.0175439	0.0243902	0.0181818
cgcc[agct]{0,1}	0.0272109	0.0347826	0.00369686	0	0.0175439	0	0	0.00680272	0.00434783	0.00184843	0.0142857	0.0175439	0	0
[agct]{0,2}tcg	0.00680272	0.00869565	0.00554529	0.0142857	0	0	0	0.0136054	0.00434783	0.00739372	0.00714286	0	0	0
[agct]{0,1}gcat	0	0	0.00554529	0	0.0175439	0	0	0	0	0.00369686	0	0	0	0
tta[agct]{0,2}	0	0	0.0147874	0.00714286	0.0175439	0.0243902	0.0545455	0	0	0.0147874	0	0	0.00813008	0.0181818
[agct]{0,2}tcc	0.0306122	0.0391304	0.00739372	0.00714286	0.0175439	0.0243902	0.0181818	0.0170068	0.0217391	0.0184843	0.0142857	0.0526316	0.0162602	0.0545455
[agct]{0,2}tca	0.00680272	0.00869565	0.0240296	0.0357143	0.0175439	0	0	0.0102041	0.0130435	0.0184843	0.0285714	0	0.00813008	0
a[agct]{0,1}gat	0	0	0.00184843	0	0	0	0	0	0.00869565	0.00184843	0	0	0	0
a[agct]{0,3}g	0.0442177	0.0565217	0.0720887	0.0642857	0.105263	0.0569106	0.0727273	0.047619	0.0434783	0.0739372	0.0357143	0.0701754	0.0406504	0.0181818
tga[agct]{0,2}	0.0102041	0.0130435	0.0184843	0.0285714	0	0.00813008	0	0.00680272	0.00434783	0.0240296	0.0357143	0.0175439	0	0
ctcc[agct]{0,1}	0.0170068	0.0217391	0.00184843	0.00714286	0	0.00813008	0	0.0102041	0.00434783	0.00184843	0.00714286	0.0175439	0.00813008	0
a[agct]{0,3}c	0.0544218	0.0695652	0.051756	0.0428571	0.0526316	0.0325203	0.0727273	0.037415	0.0565217	0.0406654	0.0785714	0.0526316	0.097561	0.109091
[agct]{0,1}gcag	0.00340136	0.00434783	0.00554529	0.00714286	0	0.00813008	0.0181818	0.00340136	0.0173913	0.00369686	0	0	0	0
a[agct]{0,3}a	0.0136054	0.0173913	0.0831793	0.0285714	0.0175439	0.0406504	0.0727273	0.0238095	0.0913043	0.0961183	0.05	0.0526316	0.097561	0.0545455
[agct]{0,1}gcac	0.00680272	0.00869565	0.0110906	0	0	0	0	0.00340136	0.00869565	0.00554529	0	0	0	0.0181818
[agct]{0,1}gcaa	0	0	0.00369686	0	0	0	0	0	0.00869565	0.00554529	0	0	0.00813008	0
ag[agct]{0,1}ct	0.00680272	0.00869565	0	0	0	0.00813008	0	0.00680272	0.00434783	0	0	0	0.00813008	0
a[agct]{0,1}gag	0.00340136	0.00434783	0.00369686	0.00714286	0	0.00813008	0	0	0	0.00369686	0	0	0	0
a[agct]{0,1}gac	0.00340136	0.00434783	0.00369686	0	0	0	0.0363636	0.0102041	0	0.00184843	0	0	0	0
a[agct]{0,1}gaa	0	0	0.00924214	0	0	0.00813008	0	0	0.0130435	0.00924214	0	0	0	0.0181818
at[agct]{0,1}ct	0	0	0.00554529	0	0	0	0	0	0	0.00369686	0	0	0	0
ag[agct]{0,1}cg	0.0102041	0.0130435	0.00369686	0.00714286	0.0175439	0	0	0.00680272	0.00434783	0.00184843	0	0	0	0
ag[agct]{0,1}cc	0.00340136	0.00434783	0	0.00714286	0	0.00813008	0	0.00680272	0.00434783	0.00184843	0.0142857	0	0	0.0181818
[agct]{0,1}actt	0	0	0.00739372	0	0	0.0243902	0.0181818	0	0.00434783	0.00924214	0	0	0	0.0181818
ag[agct]{0,1}ca	0	0	0.00369686	0.00714286	0	0.0162602	0	0.00340136	0.00434783	0.00554529	0	0.0175439	0	0
g[agct]{0,1}ttt	0	0	0.00739372	0.0142857	0	0	0.0181818	0	0.00434783	0.00369686	0	0	0	0
at[agct]{0,1}cg	0.00340136	0.00434783	0	0	0	0	0	0	0	0.00184843	0	0.0175439	0	0
tct[agct]{0,1}t	0	0	0.00554529	0	0	0	0	0.00340136	0.00434783	0.00184843	0.0142857	0	0.00813008	0
at[agct]{0,1}cc	0	0	0.00554529	0	0.0175439	0	0	0.00340136	0.00434783	0.00369686	0	0.0175439	0.00813008	0
[agct]{0,2}tat	0	0	0.012939	0	0.0175439	0.0162602	0	0	0	0.0166359	0	0	0.00813008	0
at[agct]{0,1}ca	0	0	0.00184843	0	0	0	0	0	0.00869565	0.00554529	0	0.0175439	0	0.0181818
[agct]{0,1}actg	0.00680272	0.00869565	0.00184843	0	0	0	0	0.0102041	0	0.00924214	0.0142857	0	0	0.0181818
g[agct]{0,1}ttg	0.00340136	0.00434783	0.00369686	0	0	0.0325203	0	0.00340136	0.00869565	0	0	0	0.00813008	0
[agct]{0,1}actc	0.00680272	0.00869565	0.00184843	0	0	0	0	0.00340136	0	0.00369686	0	0.0175439	0.00813008	0
[agct]{0,1}acta	0	0	0.00369686	0	0	0	0	0	0	0.00184843	0	0	0	0
g[agct]{0,1}ttc	0	0	0.00369686	0.0285714	0	0	0	0.00680272	0	0.00369686	0	0	0.00813008	0
tct[agct]{0,1}g	0.00340136	0.00434783	0.00554529	0	0	0	0	0.00340136	0	0	0	0	0	0
g[agct]{0,1}tta	0	0	0.00369686	0.00714286	0	0.00813008	0.0181818	0	0	0.00184843	0	0	0.00813008	0
[agct]{0,2}tag	0.0102041	0.0130435	0.0110906	0	0.0175439	0.00813008	0.0363636	0.00680272	0.00434783	0.012939	0	0	0	0
tct[agct]{0,1}c	0.00680272	0.00869565	0.00369686	0	0	0.00813008	0	0.00340136	0	0.00184843	0.00714286	0.0175439	0.00813008	0
tct[agct]{0,1}a	0	0	0.00554529	0	0	0	0	0	0	0.00184843	0	0.0175439	0	0.0181818
[agct]{0,2}tac	0	0	0.0166359	0.00714286	0.0175439	0.00813008	0	0.00340136	0	0.0110906	0	0.0350877	0.00813008	0
tatt[agct]{0,1}	0	0	0.00184843	0	0.0175439	0.0162602	0	0	0	0.00369686	0	0	0	0
[agct]{0,2}taa	0	0	0.0147874	0	0	0.00813008	0.0181818	0	0.00434783	0.0147874	0.00714286	0.0175439	0.0243902	0.0545455
[agct]{0,2}ggt	0.0170068	0.0217391	0.0147874	0.0214286	0.0175439	0.00813008	0.0181818	0.0136054	0.0130435	0.012939	0.00714286	0	0	0
t[agct]{0,1}cct	0.00340136	0.00434783	0	0	0.0175439	0	0.0181818	0.00340136	0.00434783	0.00924214	0.00714286	0	0.00813008	0
ctgt[agct]{0,1}	0.00680272	0.00869565	0.00369686	0	0	0	0	0.00340136	0.00434783	0.012939	0.00714286	0	0	0
tagt[agct]{0,1}	0	0	0.00184843	0	0	0	0	0	0	0.00369686	0	0	0	0
aag[agct]{0,1}t	0	0	0.00554529	0	0	0	0.0181818	0	0.00434783	0.00184843	0	0	0.0162602	0
gac[agct]{0,1}t	0	0	0	0.00714286	0	0	0.0181818	0	0	0.00184843	0	0	0.00813008	0
ag[agct]{0,1}at	0	0	0.00369686	0	0	0	0	0	0.00434783	0.00554529	0	0	0	0
att[agct]{0,2}	0	0	0.012939	0	0.0175439	0.0325203	0.0181818	0.00340136	0.00434783	0.0147874	0	0	0	0.0181818
t[agct]{0,1}ccg	0	0	0.00369686	0	0	0	0	0.00680272	0.00434783	0	0	0.0175439	0	0
[agct]{0,2}ggg	0.0578231	0.073913	0.012939	0.1	0.0701754	0.00813008	0	0.047619	0.0217391	0.0147874	0.0142857	0.0175439	0.0162602	0
[agct]{0,2}ggc	0.0408163	0.0521739	0.012939	0.0428571	0.0350877	0.0325203	0.0363636	0.0680272	0.0347826	0.00554529	0.0285714	0.0175439	0.0243902	0
t[agct]{0,1}ccc	0.00340136	0.00434783	0.00184843	0	0	0.00813008	0	0.0102041	0.0217391	0.00369686	0.0142857	0.0350877	0	0
[agct]{0,2}gga	0.0170068	0.0217391	0.0184843	0.0142857	0.0526316	0.0162602	0.0545455	0.0306122	0.0173913	0.00739372	0.00714286	0.0175439	0.0243902	0.0181818
t[agct]{0,1}cca	0.00340136	0.00434783	0.00184843	0	0	0.00813008	0	0.00340136	0.00434783	0.00924214	0	0.0175439	0.00813008	0.0181818
aag[agct]{0,1}g	0.00340136	0.00434783	0.00924214	0.00714286	0.0175439	0.00813008	0	0	0	0.00369686	0	0.0175439	0	0
gac[agct]{0,1}g	0.00340136	0.00434783	0.00369686	0	0	0	0	0.0102041	0.00434783	0.00369686	0.00714286	0	0	0
at[agct]{0,1}at	0	0	0.00184843	0	0	0	0	0	0	0.00184843	0	0	0	0
aag[agct]{0,1}c	0.00680272	0.00869565	0.00369686	0	0.0175439	0.00813008	0	0.00340136	0	0	0	0	0.00813008	0.0181818
ag[agct]{0,1}ag	0.00680272	0.00869565	0.00369686	0	0	0	0	0	0.00869565	0.00924214	0	0	0	0
aag[agct]{0,1}a	0	0	0.00739372	0	0	0.00813008	0	0.00340136	0.0217391	0.012939	0	0	0.00813008	0.0181818
gac[agct]{0,1}c	0.00340136	0.00434783	0.00184843	0	0	0	0.0181818	0.0102041	0.00434783	0.00554529	0	0	0	0
gac[agct]{0,1}a	0	0	0.00184843	0	0	0	0	0	0	0.00369686	0	0	0	0
ag[agct]{0,1}ac	0.00340136	0.00434783	0.00924214	0	0	0	0.0363636	0.00680272	0	0.00369686	0	0	0.00813008	0.0181818
ctag[agct]{0,1}	0.00680272	0.00869565	0.00184843	0	0	0	0	0.00680272	0	0.00184843	0	0	0	0
taag[agct]{0,1}	0	0	0.00739372	0	0	0	0	0	0.00434783	0.00554529	0	0	0.00813008	0.0363636
ag[agct]{0,1}aa	0	0	0.00739372	0	0	0.00813008	0.0181818	0	0.0217391	0.012939	0	0	0.00813008	0.0181818
at[agct]{0,1}ag	0	0	0.00554529	0	0.0175439	0	0	0	0	0.00369686	0	0	0	0
at[agct]{0,1}ac	0	0	0.00369686	0.00714286	0	0	0	0.00340136	0	0	0	0	0.00813008	0
at[agct]{0,1}aa	0	0	0.00554529	0	0	0	0	0	0	0.00554529	0.00714286	0	0	0
acac[agct]{0,1}	0	0	0.00739372	0.00714286	0	0.00813008	0	0	0.00434783	0.00554529	0.00714286	0	0.0243902	0
t[agct]{0,1}cat	0	0	0.00369686	0	0	0	0	0	0	0.00924214	0	0.0175439	0	0.0181818
cctc[agct]{0,1}	0	0	0.00369686	0.00714286	0	0	0	0.00680272	0.00434783	0.00739372	0.0214286	0	0.00813008	0
t[agct]{0,1}cag	0.00340136	0.00434783	0.00184843	0.00714286	0.0175439	0	0	0.00340136	0.00434783	0.00184843	0	0	0	0
t[agct]{0,1}cac	0.00340136	0.00434783	0.00924214	0.00714286	0	0	0	0	0.0130435	0.0110906	0	0	0	0
t[agct]{0,3}t	0.0238095	0.0304348	0.0961183	0.05	0.0526316	0.097561	0.0545455	0.0136054	0.0217391	0.0831793	0.0285714	0.0175439	0.0406504	0.0727273
t[agct]{0,1}caa	0	0	0.00554529	0	0	0.00813008	0	0.00680272	0	0.00369686	0	0	0.0162602	0
g[agct]{0,3}t	0.037415	0.0478261	0.0406654	0.0785714	0.0526316	0.097561	0.109091	0.0544218	0.0608696	0.051756	0.0428571	0.0526316	0.0325203	0.0727273
t[agct]{0,3}g	0.0340136	0.0434783	0.0443623	0.0571429	0.0526316	0.0813008	0.0363636	0.0442177	0.0434783	0.0443623	0.0214286	0.0526316	0.0487805	0.0363636
cga[agct]{0,1}t	0.00340136	0.00434783	0.00369686	0	0	0	0	0	0.00434783	0.00184843	0	0	0	0
t[agct]{0,3}c	0.0408163	0.0521739	0.0665434	0.0428571	0.0175439	0.0650407	0.0181818	0.047619	0.0826087	0.0720887	0.0714286	0.0701754	0.0406504	0.0363636
t[agct]{0,3}a	0.0340136	0.0434783	0.0739372	0.0142857	0.0526316	0.0650407	0.109091	0.0340136	0.026087	0.0739372	0.0142857	0.0526316	0.0650407	0.109091
g[agct]{0,3}g	0.122449	0.156522	0.0591497	0.157143	0.175439	0.0569106	0.0909091	0.139456	0.130435	0.0425139	0.0571429	0.0175439	0.0650407	0.0181818
cta[agct]{0,1}t	0	0	0.00554529	0	0	0	0	0	0	0.00184843	0	0.0175439	0	0
g[agct]{0,3}c	0.139456	0.178261	0.0536044	0.107143	0.0877193	0.0406504	0.0363636	0.139456	0.0521739	0.0536044	0.107143	0.0877193	0.0406504	0.0363636
taa[agct]{0,1}t	0	0	0.00184843	0	0	0	0	0	0	0.00554529	0	0	0	0.0363636
g[agct]{0,3}a	0.047619	0.0608696	0.0720887	0.0714286	0.0701754	0.0406504	0.0363636	0.0408163	0.0565217	0.0665434	0.0428571	0.0175439	0.0650407	0.0181818
cga[agct]{0,1}g	0.00340136	0.00434783	0.00184843	0.00714286	0	0	0	0.00340136	0	0.00184843	0	0	0	0
cga[agct]{0,1}c	0.00680272	0.00869565	0	0	0	0	0	0.00340136	0.00434783	0	0.00714286	0	0	0
cga[agct]{0,1}a	0	0	0.00184843	0	0	0	0	0	0.00869565	0.00184843	0.00714286	0	0	0
cta[agct]{0,1}g	0	0	0.00369686	0	0	0	0	0.00680272	0	0.00184843	0	0	0	0.0181818
taa[agct]{0,1}g	0	0	0.00369686	0	0	0	0	0	0	0.00369686	0	0	0.00813008	0
gcat[agct]{0,1}	0	0	0.00554529	0	0.0175439	0	0	0	0	0.00369686	0	0	0	0
a[agct]{0,1}ctt	0	0	0.00184843	0	0	0.0162602	0	0	0.00434783	0.00554529	0	0	0	0.0181818
cta[agct]{0,1}c	0.00340136	0.00434783	0	0	0	0	0	0	0	0.00554529	0	0	0	0.0181818
taa[agct]{0,1}c	0	0	0.00184843	0	0	0.00813008	0	0	0.00434783	0.00369686	0.00714286	0	0.00813008	0.0181818
cta[agct]{0,1}a	0.00340136	0.00434783	0.00369686	0	0	0	0	0.00340136	0	0.00184843	0	0	0.00813008	0
taa[agct]{0,1}a	0	0	0.00739372	0	0	0	0.0181818	0	0	0.00184843	0	0.0175439	0.00813008	0
[agct]{0,2}gct	0.0136054	0.0173913	0.0166359	0.0214286	0.0175439	0.0162602	0.0181818	0.0204082	0.0173913	0.0147874	0.0285714	0	0.00813008	0
a[agct]{0,1}ctg	0.00340136	0.00434783	0.00369686	0	0	0	0	0.00680272	0	0.00554529	0.00714286	0	0	0
[agct]{0,2}gcg	0.0238095	0.0304348	0.00369686	0.0357143	0.0175439	0	0.0181818	0.047619	0.0173913	0.00554529	0.0214286	0.0350877	0	0.0181818
a[agct]{0,1}ctc	0.00680272	0.00869565	0.00184843	0.00714286	0	0	0	0	0	0.00554529	0	0.0175439	0.00813008	0
a[agct]{0,1}cta	0	0	0.00554529	0	0	0	0	0	0	0.00369686	0	0	0	0
[agct]{0,2}gcc	0.0680272	0.0869565	0.00554529	0.0285714	0.0175439	0.0243902	0	0.0408163	0.0347826	0.012939	0.0428571	0.0350877	0.0325203	0.0181818
[agct]{0,2}gca	0.0102041	0.0130435	0.025878	0.00714286	0.0175439	0.00813008	0.0181818	0.00680272	0.0347826	0.0184843	0	0	0.00813008	0.0181818
g[agct]{0,2}gt	0.00340136	0.00434783	0.00924214	0.0214286	0	0.00813008	0.0181818	0.0238095	0.0130435	0.012939	0.0142857	0.0175439	0.0162602	0
t[agct]{0,2}gt	0.0136054	0.0173913	0.0203327	0.0285714	0	0.0406504	0	0.0102041	0.0130435	0.0166359	0	0	0	0.0181818
g[agct]{0,2}gg	0.047619	0.0608696	0.012939	0.0857143	0.0701754	0.00813008	0.0363636	0.0544218	0.0347826	0.0166359	0.0142857	0.0175439	0.0162602	0
g[agct]{0,2}gc	0.047619	0.0608696	0.0166359	0.0285714	0.0350877	0.0162602	0.0363636	0.0408163	0.0130435	0.0166359	0.0214286	0.0175439	0.00813008	0
aata[agct]{0,1}	0	0	0.00369686	0	0	0	0	0	0	0.00184843	0	0.0175439	0.0162602	0
g[agct]{0,2}ga	0.0102041	0.0130435	0.012939	0.0357143	0.0701754	0.00813008	0	0.0204082	0.0173913	0.0147874	0.0142857	0	0.00813008	0
ccca[agct]{0,1}	0.0136054	0.0173913	0.00184843	0	0	0.0162602	0	0.00680272	0.0130435	0.00369686	0	0	0.00813008	0
t[agct]{0,2}gg	0.0136054	0.0173913	0.0147874	0.0214286	0.0350877	0.0406504	0.0181818	0.0136054	0.0130435	0.00924214	0.0142857	0.0175439	0.0325203	0
t[agct]{0,2}gc	0.00680272	0.00869565	0.012939	0.0214286	0.0175439	0.0162602	0	0.0238095	0.026087	0.0147874	0.0214286	0.0175439	0.0162602	0.0181818
t[agct]{0,2}ga	0.0136054	0.0173913	0.0110906	0	0.0175439	0.0162602	0.0363636	0.0102041	0.00869565	0.012939	0	0.0175439	0.0162602	0
g[agct]{0,1}gtt	0.00340136	0.00434783	0.00554529	0.0214286	0	0.0325203	0	0.00680272	0	0.00184843	0	0	0	0
tatg[agct]{0,1}	0	0	0.00369686	0	0	0	0	0	0	0.00369686	0	0	0.00813008	0
[agct]{0,2}gat	0.00340136	0.00434783	0.0110906	0.00714286	0.0350877	0.00813008	0.0181818	0.00340136	0.0173913	0.00739372	0.00714286	0.0175439	0	0
g[agct]{0,1}gtg	0.00680272	0.00869565	0.00184843	0	0.0175439	0	0	0.00340136	0.00869565	0.00739372	0.00714286	0	0.00813008	0
tagg[agct]{0,1}	0	0	0.00369686	0	0.0175439	0.00813008	0.0181818	0.00680272	0.00434783	0.00369686	0	0	0	0
g[agct]{0,1}gtc	0.0102041	0.0130435	0.00554529	0	0	0	0	0.00340136	0.00434783	0.00184843	0	0	0	0.0181818
g[agct]{0,1}gta	0	0	0.00369686	0	0	0	0	0	0.00434783	0.00554529	0.00714286	0.0175439	0	0
[agct]{0,2}gag	0.0170068	0.0217391	0.0110906	0.0428571	0.0350877	0.0162602	0	0.0238095	0.0173913	0.012939	0.0214286	0	0.0162602	0
atg[agct]{0,2}	0	0	0.0184843	0	0.0175439	0	0.0181818	0	0.0130435	0.0166359	0	0.0175439	0.0162602	0
caac[agct]{0,1}	0.00680272	0.00869565	0.00369686	0	0	0	0	0.00680272	0.00434783	0.00739372	0.00714286	0	0.0162602	0
[agct]{0,2}gac	0.00680272	0.00869565	0.00739372	0.00714286	0	0	0.0363636	0.0204082	0.00869565	0.0147874	0.00714286	0	0.00813008	0
[agct]{0,2}gaa	0.0238095	0.0304348	0.0203327	0.00714286	0.0175439	0.0162602	0.0181818	0.00680272	0.026087	0.0221811	0.0214286	0.0175439	0.00813008	0.0181818
g[agct]{0,1}agt	0.00340136	0.00434783	0.00184843	0	0	0.00813008	0	0.00340136	0.00434783	0.00554529	0	0	0.00813008	0
agg[agct]{0,2}	0.0136054	0.0173913	0.0240296	0.0285714	0.0526316	0.0243902	0.0363636	0.0204082	0.026087	0.0110906	0.00714286	0.0175439	0	0.0181818
agct[agct]{0,1}	0.00340136	0.00434783	0.00554529	0.00714286	0	0	0	0.00340136	0.00434783	0.00554529	0.00714286	0	0	0
actc[agct]{0,1}	0.00680272	0.00869565	0.00184843	0	0	0	0	0.00340136	0	0.00369686	0	0.0175439	0.00813008	0
acgc[agct]{0,1}	0.00340136	0.00434783	0.00184843	0	0.0175439	0	0.0181818	0.00340136	0.00434783	0	0.00714286	0	0	0
g[agct]{0,1}agg	0.0102041	0.0130435	0.00554529	0.00714286	0.0350877	0.00813008	0.0181818	0.00340136	0.0130435	0.00184843	0	0.0175439	0	0
gccc[agct]{0,1}	0.0306122	0.0391304	0.00184843	0.00714286	0	0.00813008	0	0.0170068	0.00869565	0.00184843	0.0285714	0	0	0
atct[agct]{0,1}	0	0	0	0	0	0	0	0	0	0.00184843	0	0.0175439	0	0
g[agct]{0,1}agc	0.0102041	0.0130435	0.00369686	0.00714286	0	0	0	0.0102041	0	0.00554529	0.00714286	0	0	0
g[agct]{0,1}aga	0.00340136	0.00434783	0.00184843	0.00714286	0.0175439	0.00813008	0	0.00680272	0.00434783	0.00369686	0	0	0.00813008	0
tgat[agct]{0,1}	0.00340136	0.00434783	0.00184843	0.00714286	0	0	0	0	0.00434783	0.00369686	0.00714286	0	0	0
ttat[agct]{0,1}	0	0	0.00369686	0	0	0.00813008	0	0	0	0.00369686	0	0	0	0
gat[agct]{0,2}	0.00340136	0.00434783	0.0110906	0.00714286	0.0175439	0.00813008	0.0181818	0.00340136	0.0173913	0.00739372	0.00714286	0.0175439	0	0
gg[agct]{0,1}tt	0.00340136	0.00434783	0.00554529	0.0214286	0	0.0162602	0.0181818	0.00680272	0.00434783	0	0	0	0.00813008	0
cgg[agct]{0,1}t	0.00340136	0.00434783	0	0.00714286	0	0	0	0.0170068	0.00434783	0	0.00714286	0	0	0
tat[agct]{0,2}	0	0	0.012939	0	0.0175439	0.0162602	0	0	0	0.0166359	0	0	0.00813008	0
tc[agct]{0,1}tt	0.00340136	0.00434783	0.00924214	0	0	0	0	0	0	0.00554529	0	0	0.00813008	0
cc[agct]{0,1}gt	0.0136054	0.0173913	0.00184843	0	0	0	0.0181818	0.00340136	0	0.00554529	0	0	0	0
tat[agct]{0,1}t	0	0	0.00369686	0	0	0.0162602	0	0	0	0.00739372	0	0	0	0
gt[agct]{0,1}tt	0.00340136	0.00434783	0.00369686	0.00714286	0.0175439	0.0243902	0	0.00340136	0	0.00369686	0	0	0	0
gg[agct]{0,1}tg	0.00340136	0.00434783	0.00369686	0.00714286	0.0175439	0.00813008	0	0.00340136	0.00869565	0.00554529	0.00714286	0	0	0
ctg[agct]{0,1}t	0	0	0.00369686	0	0.0175439	0	0	0	0	0.00369686	0.00714286	0	0	0
g[agct]{0,2}ct	0.0204082	0.026087	0.00739372	0.0214286	0	0.0162602	0.0363636	0.0170068	0.0173913	0.0147874	0.0214286	0	0.00813008	0.0545455
tag[agct]{0,1}t	0	0	0.00369686	0	0	0	0	0	0.00434783	0.00554529	0	0	0	0
cgg[agct]{0,1}g	0.0170068	0.0217391	0.00184843	0.0214286	0	0.00813008	0.0181818	0.0272109	0	0.00369686	0.00714286	0.0175439	0.00813008	0
gg[agct]{0,1}tc	0.0136054	0.0173913	0.00369686	0.00714286	0.0175439	0	0	0.0102041	0	0.00184843	0.00714286	0.0175439	0	0
tc[agct]{0,1}tg	0.00340136	0.00434783	0.00184843	0	0	0	0.0181818	0.00340136	0.00434783	0.00739372	0	0	0	0.0181818
gg[agct]{0,1}ta	0	0	0.00184843	0	0	0	0	0.00340136	0	0.00184843	0	0	0	0
cc[agct]{0,1}gg	0.0272109	0.0347826	0	0.00714286	0	0	0.0181818	0.0272109	0.0130435	0	0.00714286	0	0	0.0181818
cgg[agct]{0,1}c	0.0136054	0.0173913	0.00184843	0.0142857	0	0	0	0.0238095	0.00869565	0	0.0214286	0	0	0
tat[agct]{0,1}g	0	0	0.00184843	0	0	0	0	0	0	0.00369686	0	0	0.00813008	0
tc[agct]{0,1}tc	0.00340136	0.00434783	0.00369686	0	0	0	0	0.00340136	0	0.00184843	0.00714286	0	0.00813008	0
cgg[agct]{0,1}a	0.00680272	0.00869565	0	0	0.0175439	0	0	0	0	0.00369686	0	0	0	0
cc[agct]{0,1}gc	0.0204082	0.026087	0.00184843	0.0142857	0	0	0	0.0170068	0.00869565	0.00369686	0.0285714	0.0175439	0.00813008	0.0181818
tc[agct]{0,1}ta	0	0	0.00184843	0	0	0	0	0	0	0.00369686	0	0	0	0.0181818
gctt[agct]{0,1}	0	0	0.00184843	0	0	0.00813008	0.0181818	0.00340136	0.00869565	0.00554529	0	0	0.00813008	0
gt[agct]{0,1}tg	0.00340136	0.00434783	0.00924214	0	0	0.0162602	0	0	0.00869565	0.00739372	0	0	0.00813008	0
tat[agct]{0,1}c	0	0	0.00184843	0	0	0	0	0	0	0.00369686	0	0	0	0
t[agct]{0,2}ct	0.00680272	0.00869565	0.0184843	0	0.0350877	0.00813008	0.0181818	0.00340136	0.00869565	0.0184843	0.0285714	0	0.0243902	0.0363636
cc[agct]{0,1}ga	0.00340136	0.00434783	0.00184843	0	0	0.00813008	0	0.0102041	0.0130435	0.00369686	0.00714286	0	0.00813008	0
tat[agct]{0,1}a	0	0	0.00554529	0	0.0175439	0	0	0	0	0.00184843	0	0	0	0
g[agct]{0,2}cg	0.037415	0.0478261	0.00554529	0.0357143	0.0175439	0	0.0181818	0.0510204	0.026087	0.00184843	0.0214286	0	0.00813008	0
ctg[agct]{0,1}g	0.00680272	0.00869565	0.00554529	0.00714286	0	0	0	0.0136054	0.00434783	0.00924214	0.0214286	0	0	0
tag[agct]{0,1}g	0.00340136	0.00434783	0.00184843	0	0.0175439	0	0	0.00680272	0	0	0	0	0	0
gt[agct]{0,1}tc	0.00340136	0.00434783	0.00554529	0.0214286	0	0	0	0	0	0.00184843	0	0	0.00813008	0
gt[agct]{0,1}ta	0	0	0.00184843	0.00714286	0	0	0	0	0	0.00184843	0.00714286	0	0.00813008	0
g[agct]{0,2}cc	0.0646259	0.0826087	0.0110906	0.0285714	0.0175439	0.00813008	0	0.0680272	0.026087	0.0184843	0.05	0.0350877	0.00813008	0
gcgt[agct]{0,1}	0.00340136	0.00434783	0	0.00714286	0	0	0	0.00340136	0.00869565	0.00184843	0	0.0175439	0	0.0181818
ctg[agct]{0,1}c	0.0102041	0.0130435	0.00739372	0	0	0	0.0181818	0.00340136	0.00869565	0.00739372	0.00714286	0	0.00813008	0.0181818
tag[agct]{0,1}c	0.00340136	0.00434783	0.00184843	0	0	0.00813008	0	0	0	0.00184843	0	0	0	0
g[agct]{0,2}ca	0.0272109	0.0347826	0.025878	0.0214286	0	0.0243902	0	0.0136054	0.0173913	0.0147874	0.0142857	0	0.0243902	0
ctg[agct]{0,1}a	0.00340136	0.00434783	0.00184843	0	0	0	0	0.00340136	0.00434783	0.00184843	0.00714286	0.0175439	0	0
tag[agct]{0,1}a	0.00340136	0.00434783	0.00369686	0	0	0	0.0363636	0	0	0.00554529	0	0	0	0
t[agct]{0,2}cg	0.00680272	0.00869565	0.00554529	0.0214286	0	0	0	0.00680272	0.0130435	0.00739372	0.00714286	0.0175439	0	0
t[agct]{0,2}cc	0.0170068	0.0217391	0.00739372	0	0	0.0243902	0.0181818	0.0170068	0.0347826	0.012939	0.0142857	0.0526316	0.00813008	0
t[agct]{0,2}ca	0.00680272	0.00869565	0.025878	0.0142857	0	0.00813008	0.0181818	0.0102041	0.0130435	0.025878	0	0.0175439	0.0162602	0.0181818
acca[agct]{0,1}	0	0	0.00184843	0	0	0	0	0.00340136	0.00434783	0	0.00714286	0.0175439	0.00813008	0
gcag[agct]{0,1}	0.00340136	0.00434783	0.00554529	0.00714286	0	0.00813008	0.0181818	0.00340136	0.0173913	0.00369686	0	0	0	0
tgcc[agct]{0,1}	0.00680272	0.00869565	0	0	0	0	0	0.00680272	0.00869565	0.00924214	0	0	0.00813008	0.0181818
g[agct]{0,2}at	0.00680272	0.00869565	0.00924214	0	0.0350877	0.0243902	0	0	0.0173913	0.012939	0.00714286	0.0175439	0	0.0181818
g[agct]{0,1}act	0.00340136	0.00434783	0.00369686	0	0	0.00813008	0.0181818	0.0102041	0.00434783	0.00554529	0	0	0	0.0181818
t[agct]{0,2}at	0	0	0.0166359	0.00714286	0.0175439	0	0.0181818	0	0	0.0221811	0	0.0175439	0	0.0181818
ttcc[agct]{0,1}	0	0	0.00184843	0	0	0.00813008	0.0181818	0.00680272	0.00869565	0.00924214	0.00714286	0.0175439	0	0
g[agct]{0,2}ag	0.0136054	0.0173913	0.0221811	0.0285714	0.0350877	0.0162602	0.0363636	0.0204082	0.0347826	0.00924214	0	0	0.0162602	0.0181818
aaac[agct]{0,1}	0	0	0.00184843	0	0	0.0162602	0	0	0	0.00739372	0.0285714	0	0.0162602	0
g[agct]{0,1}acg	0.00680272	0.00869565	0.00554529	0	0.0175439	0	0.0181818	0	0.00434783	0	0	0	0.00813008	0
gcc[agct]{0,2}	0.0680272	0.0869565	0.00554529	0.0285714	0.0175439	0.0243902	0	0.0408163	0.0347826	0.012939	0.0428571	0.0350877	0.0325203	0.0363636
g[agct]{0,2}ac	0.00680272	0.00869565	0.012939	0.0142857	0.0175439	0.0162602	0	0.0136054	0.00434783	0.00924214	0.0285714	0.0175439	0.00813008	0.0181818
g[agct]{0,1}acc	0.00340136	0.00434783	0.00184843	0	0	0	0	0.00680272	0.00434783	0.00554529	0.00714286	0.0175439	0	0
g[agct]{0,2}aa	0.0102041	0.0130435	0.0203327	0.00714286	0	0	0.0181818	0.00340136	0.0173913	0.025878	0.00714286	0	0.0162602	0.0181818
g[agct]{0,1}aca	0.00340136	0.00434783	0.0110906	0.00714286	0	0	0	0	0.00869565	0.00554529	0	0	0.00813008	0
t[agct]{0,2}ag	0.00680272	0.00869565	0.0147874	0.0142857	0.0175439	0.0162602	0	0.0136054	0.00869565	0.0110906	0	0.0175439	0.0162602	0.0181818
t[agct]{0,2}ac	0.0102041	0.0130435	0.0184843	0.0142857	0	0.0162602	0	0.00340136	0.0130435	0.0295749	0.0142857	0	0.00813008	0
t[agct]{0,2}aa	0.0102041	0.0130435	0.0277264	0	0	0.0243902	0.0545455	0.0102041	0.00434783	0.0147874	0.0142857	0	0.0325203	0.0363636
catc[agct]{0,1}	0	0	0.00554529	0	0	0	0	0	0.00434783	0.00184843	0	0	0	0
cagc[agct]{0,1}	0.00340136	0.00434783	0.00554529	0.0214286	0	0	0	0	0.00434783	0.00554529	0.00714286	0.0175439	0	0
[agct]{0,2}ctt	0.00680272	0.00869565	0.0184843	0	0.0175439	0.0325203	0.0363636	0.0102041	0.0173913	0.025878	0.00714286	0.0350877	0.0243902	0.0181818
ca[agct]{0,3}	0.047619	0.0608696	0.0850277	0.0571429	0.0350877	0.0650407	0.0363636	0.047619	0.0826087	0.0720887	0.0357143	0.0526316	0.097561	0.0727273
[agct]{0,1}acgt	0	0	0.00369686	0.0142857	0	0.0162602	0	0	0.00434783	0.00369686	0.0142857	0	0.0162602	0
g[agct]{0,1}tgt	0	0	0.00184843	0	0	0	0	0.00340136	0	0.00184843	0.0142857	0	0	0
[agct]{0,2}ctg	0.0204082	0.026087	0.0184843	0.00714286	0.0175439	0	0.0181818	0.0204082	0.0173913	0.0221811	0.0428571	0.0175439	0.00813008	0.0363636
cc[agct]{0,1}ct	0.00680272	0.00869565	0.00554529	0	0	0	0	0.00680272	0	0.00369686	0.0214286	0.0526316	0.00813008	0
[agct]{0,1}acgg	0.00680272	0.00869565	0.00184843	0	0	0	0	0.00340136	0.00869565	0.00184843	0.00714286	0	0	0
g[agct]{0,1}tgg	0.0102041	0.0130435	0.00554529	0	0.0175439	0	0.0181818	0.0102041	0.00869565	0.00739372	0	0	0	0
[agct]{0,2}ctc	0.0238095	0.0304348	0.012939	0.0214286	0	0.0162602	0	0.0170068	0.00869565	0.00924214	0.0428571	0.0350877	0.0162602	0
gca[agct]{0,1}t	0.00340136	0.00434783	0.00369686	0	0	0	0	0.00340136	0.00869565	0.00554529	0	0	0	0.0181818
[agct]{0,1}acgc	0.00340136	0.00434783	0.00184843	0	0.0175439	0	0.0181818	0.00340136	0.00434783	0	0.00714286	0	0	0
[agct]{0,2}cta	0.00680272	0.00869565	0.012939	0	0	0	0	0.0102041	0	0.0110906	0	0.0175439	0.00813008	0.0363636
[agct]{0,1}acga	0	0	0.00184843	0	0	0	0	0	0.00434783	0.00369686	0	0	0	0
g[agct]{0,1}tgc	0	0	0.00924214	0	0	0.00813008	0	0	0.00869565	0.00739372	0.00714286	0	0	0
tggt[agct]{0,1}	0.00340136	0.00434783	0	0.00714286	0.0175439	0.00813008	0	0	0.00434783	0.00184843	0	0	0	0
g[agct]{0,1}aat	0.00340136	0.00434783	0.00554529	0	0	0	0	0	0.00434783	0.00184843	0	0	0	0.0181818
g[agct]{0,1}tga	0	0	0.00369686	0.0142857	0	0	0	0.00340136	0	0.00554529	0.00714286	0	0	0
agaa[agct]{0,1}	0.00680272	0.00869565	0.00369686	0	0	0.00813008	0.0181818	0	0.0130435	0.012939	0	0	0	0
cc[agct]{0,1}cg	0.0170068	0.0217391	0	0.00714286	0	0.00813008	0	0.0204082	0.00434783	0.00184843	0.0428571	0	0	0.0181818
cc[agct]{0,1}cc	0.0238095	0.0304348	0.00554529	0	0	0	0	0.0102041	0.00434783	0.00184843	0.0357143	0.0175439	0	0.0181818
gca[agct]{0,1}g	0.00340136	0.00434783	0.00554529	0	0.0175439	0.00813008	0.0181818	0.00340136	0.00869565	0	0	0	0	0
gtt[agct]{0,2}	0.0102041	0.0130435	0.0221811	0.0428571	0	0.0325203	0.0181818	0.0170068	0.00434783	0.0110906	0.00714286	0	0.0162602	0
cc[agct]{0,1}ca	0.00340136	0.00434783	0.00369686	0.0142857	0.0175439	0.0162602	0	0	0.00869565	0.00739372	0	0	0	0
agcg[agct]{0,1}	0.00680272	0.00869565	0.00184843	0.0142857	0	0	0	0.00680272	0	0	0.00714286	0	0	0
ttgt[agct]{0,1}	0.00340136	0.00434783	0.00369686	0	0	0.0243902	0	0.00340136	0	0.00369686	0	0	0	0
gca[agct]{0,1}c	0	0	0.00739372	0.00714286	0	0	0	0	0	0.00924214	0	0	0.00813008	0
g[agct]{0,1}aag	0.00340136	0.00434783	0.00739372	0	0.0175439	0.00813008	0	0	0.0173913	0	0	0	0.00813008	0
ataa[agct]{0,1}	0	0	0.00369686	0	0	0	0	0	0	0.00369686	0	0	0.00813008	0
gca[agct]{0,1}a	0.00340136	0.00434783	0.00924214	0	0	0	0	0	0.0173913	0.00369686	0	0	0	0
ggt[agct]{0,2}	0.0170068	0.0217391	0.0147874	0.0214286	0.0175439	0.00813008	0.0181818	0.0136054	0.0130435	0.012939	0.00714286	0	0	0
g[agct]{0,1}aac	0	0	0.00369686	0.00714286	0	0.00813008	0	0	0.00434783	0.00739372	0.0214286	0	0.00813008	0
cgta[agct]{0,1}	0	0	0	0	0	0	0	0	0	0.00184843	0	0.0175439	0	0
g[agct]{0,1}aaa	0	0	0.00924214	0	0	0	0.0181818	0	0.00869565	0.00924214	0.00714286	0	0	0.0181818
ttt[agct]{0,2}	0	0	0.0406654	0.0214286	0	0.0487805	0.0181818	0	0.0217391	0.0314233	0	0	0.0162602	0.0727273
atcg[agct]{0,1}	0	0	0.00184843	0	0	0	0	0	0.00434783	0.00369686	0	0	0	0
tgt[agct]{0,2}	0.0102041	0.0130435	0.0184843	0.00714286	0.0175439	0.0487805	0	0.00680272	0.00434783	0.0277264	0.0142857	0	0.0162602	0
tgag[agct]{0,1}	0.00340136	0.00434783	0.00739372	0.00714286	0	0	0	0.00340136	0	0.00739372	0.0142857	0	0	0
ctta[agct]{0,1}	0	0	0.00554529	0	0	0.00813008	0.0363636	0	0	0.00739372	0	0	0	0
ttag[agct]{0,1}	0	0	0.00369686	0	0.0175439	0.00813008	0.0363636	0	0	0.00184843	0	0	0	0
gag[agct]{0,2}	0.0170068	0.0217391	0.00924214	0.0428571	0.0350877	0.0162602	0	0.0238095	0.0173913	0.012939	0.0214286	0	0.0162602	0
cc[agct]{0,1}at	0	0	0.00369686	0	0	0	0	0	0.00434783	0.00184843	0	0	0.00813008	0
tag[agct]{0,2}	0.0102041	0.0130435	0.0110906	0	0.0175439	0.00813008	0.0363636	0.00680272	0.00434783	0.012939	0	0	0	0
caca[agct]{0,1}	0.00680272	0.00869565	0.0147874	0	0	0.0162602	0	0.00340136	0.00434783	0.00184843	0	0	0.0162602	0
cc[agct]{0,1}ag	0.0170068	0.0217391	0	0.00714286	0	0.00813008	0	0	0.0130435	0.00369686	0	0	0	0
cc[agct]{0,1}ac	0.0102041	0.0130435	0.00369686	0	0	0.0162602	0	0.0102041	0.00434783	0.00554529	0	0	0	0
cc[agct]{0,1}aa	0	0	0.00184843	0	0	0	0	0.00340136	0.00434783	0	0.0142857	0.0175439	0.0325203	0.0181818
ggtc[agct]{0,1}	0.0102041	0.0130435	0.00369686	0	0	0	0	0	0.00434783	0	0	0	0	0
tctc[agct]{0,1}	0.00340136	0.00434783	0.00369686	0	0	0.00813008	0	0	0	0	0.0142857	0.0175439	0	0
gcgg[agct]{0,1}	0.00680272	0.00869565	0	0.0214286	0.0175439	0	0.0181818	0.0340136	0	0.00184843	0.0142857	0.0175439	0	0
agc[agct]{0,1}t	0.00340136	0.00434783	0.00184843	0.00714286	0	0	0	0	0.00869565	0.00554529	0	0	0.00813008	0
atc[agct]{0,1}t	0	0	0.00184843	0	0	0	0	0	0	0.00184843	0	0	0	0
agc[agct]{0,1}g	0.0136054	0.0173913	0.00369686	0.00714286	0	0	0	0.00680272	0.00869565	0.00554529	0.00714286	0	0	0
agc[agct]{0,1}c	0.00340136	0.00434783	0.00739372	0.0142857	0	0	0	0.00680272	0	0.00184843	0.0142857	0	0	0.0181818
tga[agct]{0,1}t	0.00340136	0.00434783	0.00554529	0	0	0	0	0.00340136	0	0.00369686	0.00714286	0	0	0
[agct]{0,1}acct	0	0	0.00369686	0	0	0	0	0	0	0.00554529	0	0	0	0
agc[agct]{0,1}a	0	0	0.00184843	0	0	0.00813008	0	0	0.00434783	0.00369686	0	0.0175439	0.00813008	0
g[agct]{0,1}tct	0.00340136	0.00434783	0.00184843	0	0	0.00813008	0	0.00340136	0.00434783	0	0	0	0	0
atc[agct]{0,1}g	0.00340136	0.00434783	0.00184843	0	0	0	0	0	0	0.00184843	0	0	0	0
atc[agct]{0,1}c	0	0	0.00369686	0.00714286	0.0175439	0	0	0.00340136	0.00869565	0	0	0.0350877	0.00813008	0
tta[agct]{0,1}t	0	0	0.00184843	0	0	0.00813008	0	0	0	0.00554529	0	0	0	0
atc[agct]{0,1}a	0	0	0	0	0	0	0	0	0.00434783	0.00739372	0.00714286	0	0	0.0181818
tga[agct]{0,1}g	0	0	0.00554529	0.0142857	0	0.00813008	0	0	0	0.00739372	0.00714286	0.0175439	0	0
gacc[agct]{0,1}	0	0	0	0	0	0	0	0.0102041	0	0.00369686	0	0	0	0
[agct]{0,1}accg	0.0102041	0.0130435	0.00184843	0	0	0	0	0	0	0.00184843	0.00714286	0	0	0.0181818
g[agct]{0,1}tcg	0.00340136	0.00434783	0	0.00714286	0	0	0	0.00680272	0.00434783	0	0	0	0	0
tga[agct]{0,1}c	0.00680272	0.00869565	0.00184843	0.0142857	0	0	0	0.00340136	0.00434783	0.00739372	0.0142857	0	0	0
[agct]{0,1}accc	0.00340136	0.00434783	0.00554529	0.00714286	0	0	0	0.0136054	0	0.00739372	0.00714286	0	0	0
tga[agct]{0,1}a	0	0	0.00554529	0	0	0	0	0	0	0.00554529	0.00714286	0	0	0
g[agct]{0,1}tcc	0.0204082	0.026087	0.00369686	0.00714286	0.0175439	0	0	0.00340136	0.00869565	0.00184843	0.00714286	0.0175439	0	0
[agct]{0,1}acca	0	0	0.00184843	0	0	0	0	0.00340136	0.00434783	0	0.00714286	0.0175439	0.00813008	0
g[agct]{0,1}tca	0.00340136	0.00434783	0.00739372	0.0142857	0	0	0	0.00680272	0	0.00184843	0.0142857	0	0	0
tta[agct]{0,1}g	0	0	0.00369686	0	0.0175439	0.00813008	0.0181818	0	0	0.00184843	0	0	0.00813008	0.0181818
tta[agct]{0,1}c	0	0	0.00739372	0	0	0	0	0	0	0	0	0	0	0
a[agct]{0,1}cgt	0.00340136	0.00434783	0	0.00714286	0	0	0	0	0	0.00369686	0	0	0	0
tta[agct]{0,1}a	0	0	0.00184843	0.00714286	0	0.00813008	0.0363636	0	0	0.00739372	0	0	0	0
a[agct]{0,1}cgg	0.00680272	0.00869565	0.00184843	0.00714286	0	0	0	0.00680272	0	0.00184843	0.00714286	0	0	0
a[agct]{0,1}cgc	0.0102041	0.0130435	0.00184843	0	0	0	0	0.00340136	0.00434783	0	0.0142857	0	0	0.0181818
a[agct]{0,1}cga	0	0	0.00184843	0	0	0	0	0	0.00434783	0.00369686	0.00714286	0	0	0
gct[agct]{0,1}t	0	0	0.00184843	0	0	0.00813008	0	0	0.00434783	0.00369686	0.00714286	0	0	0
gcg[agct]{0,1}t	0.00340136	0.00434783	0	0.0142857	0	0	0.0181818	0.0102041	0	0.00184843	0	0	0	0
agta[agct]{0,1}	0	0	0.00554529	0	0	0	0	0	0.00434783	0.00739372	0	0	0.00813008	0
gct[agct]{0,1}g	0.00340136	0.00434783	0.00554529	0	0.0175439	0	0	0.0102041	0.00434783	0.00184843	0	0	0.00813008	0
[agct]{0,1}acat	0	0	0.00369686	0	0	0.00813008	0	0	0	0.00369686	0	0.0175439	0	0
agga[agct]{0,1}	0.00340136	0.00434783	0.00739372	0	0	0	0.0363636	0.00680272	0.00434783	0	0	0	0	0.0181818
g[agct]{0,1}tat	0	0	0.00184843	0	0	0.00813008	0	0	0	0.00369686	0	0	0	0
gct[agct]{0,1}c	0.0102041	0.0130435	0.00554529	0.00714286	0	0	0	0.0102041	0.00869565	0.00369686	0.00714286	0	0	0
ggca[agct]{0,1}	0.00680272	0.00869565	0.00924214	0	0	0.00813008	0.0181818	0.00680272	0.00869565	0	0	0	0	0
atta[agct]{0,1}	0	0	0.00184843	0	0.0175439	0	0	0	0	0	0	0	0	0
gct[agct]{0,1}a	0	0	0.00369686	0.0142857	0	0.00813008	0.0181818	0	0	0.00554529	0.0142857	0	0	0
gcg[agct]{0,1}g	0.00340136	0.00434783	0.00184843	0.0214286	0	0	0	0.0170068	0.00434783	0	0.0142857	0	0	0
tcca[agct]{0,1}	0.00340136	0.00434783	0.00184843	0	0	0.00813008	0	0.00340136	0.00434783	0.00924214	0	0	0	0.0181818
gcg[agct]{0,1}c	0.0136054	0.0173913	0.00184843	0	0	0	0	0.0136054	0.00869565	0.00184843	0.00714286	0.0175439	0	0.0181818
atga[agct]{0,1}	0	0	0.00739372	0	0	0	0	0	0	0.00554529	0	0	0	0
gcg[agct]{0,1}a	0.00340136	0.00434783	0	0	0.0175439	0	0	0.00680272	0.00434783	0.00184843	0	0.0175439	0	0
[agct]{0,1}acag	0.00340136	0.00434783	0.012939	0.00714286	0	0	0	0.00680272	0	0.00369686	0	0	0	0
gtca[agct]{0,1}	0	0	0.00554529	0.00714286	0	0	0	0	0.00869565	0.00369686	0.00714286	0	0	0
g[agct]{0,1}tag	0	0	0.00554529	0	0	0	0.0181818	0.00340136	0.00434783	0	0	0	0	0
[agct]{0,1}acac	0	0	0.00739372	0.00714286	0	0.00813008	0	0	0.00434783	0.00554529	0.00714286	0	0.0243902	0
g[agct]{0,1}tac	0	0	0.00554529	0	0.0175439	0	0	0.00340136	0	0	0	0	0	0
[agct]{0,1}acaa	0.00340136	0.00434783	0.00369686	0	0	0	0	0.00340136	0.00434783	0.00369686	0	0	0.0243902	0
g[agct]{0,1}taa	0	0	0	0	0	0	0	0	0	0.00739372	0	0	0	0
g[agct]{0,1}ggt	0	0	0.00369686	0.0142857	0	0	0.0181818	0.0102041	0.00434783	0.00554529	0	0	0	0
gtg[agct]{0,2}	0.0136054	0.0173913	0.0184843	0.0214286	0.0175439	0.0243902	0.0363636	0.0204082	0.0173913	0.0295749	0.0142857	0	0.0325203	0
cgac[agct]{0,1}	0.00340136	0.00434783	0	0	0	0	0	0	0	0.00184843	0	0	0	0
g[agct]{0,1}ggg	0.0102041	0.0130435	0.00184843	0.0642857	0	0	0	0.0170068	0.00869565	0.00369686	0.0142857	0	0.0162602	0
g[agct]{0,1}ggc	0.0238095	0.0304348	0.00184843	0.0142857	0.0175439	0.00813008	0.0181818	0.0170068	0	0.00184843	0.00714286	0.0175439	0.00813008	0
ggg[agct]{0,2}	0.0578231	0.073913	0.012939	0.1	0.0701754	0.00813008	0	0.047619	0.0217391	0.0147874	0.0142857	0.0175439	0.0162602	0
g[agct]{0,1}gga	0.00340136	0.00434783	0.00554529	0.00714286	0.0526316	0	0	0.00680272	0.00869565	0.00369686	0	0	0	0
ttg[agct]{0,2}	0.0136054	0.0173913	0.0166359	0.00714286	0	0.0650407	0	0.00680272	0.0217391	0.0166359	0	0	0.00813008	0
ctac[agct]{0,1}	0	0	0.00554529	0	0	0	0	0.00340136	0	0.00184843	0	0	0	0
taac[agct]{0,1}	0	0	0.00184843	0	0	0	0	0	0	0.00184843	0	0	0.00813008	0.0181818
tgg[agct]{0,2}	0.0204082	0.026087	0.0184843	0.00714286	0.0350877	0.0243902	0.0363636	0.0238095	0.026087	0.00739372	0	0	0.0406504	0
aatt[agct]{0,1}	0	0	0.00369686	0	0	0	0	0	0.00434783	0.00369686	0	0	0	0
ccct[agct]{0,1}	0.0102041	0.0130435	0.00554529	0	0.0175439	0	0	0.0102041	0	0.00739372	0.0214286	0.0350877	0	0
a[agct]{0,1}cct	0.00340136	0.00434783	0.00369686	0	0	0	0	0.00340136	0.00434783	0.00554529	0	0	0.00813008	0
aagt[agct]{0,1}	0	0	0.00924214	0	0	0	0.0181818	0	0	0.00739372	0	0	0.0243902	0.0181818
gg[agct]{0,1}gt	0	0	0.00184843	0.00714286	0	0.00813008	0	0.00680272	0.00869565	0.00369686	0.00714286	0.0175439	0	0
[agct]{0,1}catt	0	0	0.00184843	0	0	0.00813008	0	0	0	0.00739372	0	0	0	0.0181818
tgg[agct]{0,1}t	0.00680272	0.00869565	0.00739372	0.00714286	0.0175439	0.00813008	0.0181818	0	0	0	0	0	0.00813008	0
a[agct]{0,1}ccg	0.0170068	0.0217391	0	0.00714286	0	0	0	0.00340136	0	0	0.00714286	0	0	0
tc[agct]{0,1}gt	0	0	0.00554529	0.0285714	0	0	0	0.00680272	0.00434783	0.00184843	0	0	0	0
a[agct]{0,1}ccc	0.00340136	0.00434783	0.00554529	0.00714286	0.0175439	0	0	0.00680272	0.00434783	0.00184843	0.0214286	0.0175439	0.00813008	0
a[agct]{0,1}cca	0	0	0	0	0	0.00813008	0	0.00680272	0.00869565	0.00739372	0.00714286	0.0175439	0.00813008	0.0181818
gt[agct]{0,1}gt	0	0	0.00184843	0.00714286	0	0	0	0.00340136	0	0.00184843	0	0	0	0
gg[agct]{0,1}gg	0.0102041	0.0130435	0.00184843	0.0357143	0.0175439	0	0.0181818	0.0238095	0.0130435	0.00554529	0	0	0	0
ttg[agct]{0,1}t	0.00340136	0.00434783	0.00739372	0.00714286	0	0.0162602	0	0	0.00434783	0	0	0	0	0
[agct]{0,1}catg	0	0	0.00554529	0	0.0175439	0	0	0	0.00434783	0.00554529	0	0.0175439	0	0
tgg[agct]{0,1}g	0.00680272	0.00869565	0	0	0	0	0	0.00340136	0.00869565	0.00369686	0	0	0	0
gg[agct]{0,1}gc	0.0204082	0.026087	0.00554529	0.0214286	0	0	0	0.0238095	0.00434783	0.00554529	0.00714286	0	0	0
tc[agct]{0,1}gg	0.0102041	0.0130435	0.00369686	0.00714286	0	0.00813008	0	0.00340136	0.00434783	0.00184843	0	0	0.00813008	0
[agct]{0,1}catc	0	0	0.00554529	0	0	0	0	0	0.00434783	0.00184843	0	0	0	0
gg[agct]{0,1}ga	0.00680272	0.00869565	0.00184843	0.00714286	0.0526316	0	0	0.00680272	0	0.00369686	0	0	0.00813008	0
tgg[agct]{0,1}c	0.00340136	0.00434783	0.00184843	0	0	0.00813008	0	0.0170068	0.00869565	0.00184843	0	0	0.0243902	0
[agct]{0,1}cata	0	0	0.00369686	0	0	0.00813008	0	0	0	0.00369686	0	0	0	0
tgg[agct]{0,1}a	0.00340136	0.00434783	0.00924214	0	0.0175439	0.00813008	0.0181818	0.00340136	0.00869565	0.00184843	0	0	0.00813008	0
aaag[agct]{0,1}	0	0	0.00924214	0	0	0.00813008	0.0181818	0	0.0173913	0.00554529	0	0	0.0162602	0
tc[agct]{0,1}gc	0.00680272	0.00869565	0.00369686	0.0142857	0	0	0	0	0.00434783	0.00184843	0.0142857	0.0175439	0	0
tc[agct]{0,1}ga	0.00340136	0.00434783	0.00369686	0	0.0175439	0	0	0.00340136	0	0.00369686	0	0.0175439	0	0
gt[agct]{0,1}gg	0.0102041	0.0130435	0.00554529	0	0	0	0	0.0102041	0.00434783	0.00369686	0	0	0.0162602	0
ttg[agct]{0,1}g	0.00340136	0.00434783	0.00369686	0	0	0.0243902	0	0.00340136	0.00434783	0.00369686	0	0	0	0
gt[agct]{0,1}gc	0.00680272	0.00869565	0.00184843	0	0.0175439	0.00813008	0.0181818	0	0	0.00369686	0	0	0.00813008	0
ttg[agct]{0,1}c	0	0	0.00184843	0	0	0.00813008	0	0.00340136	0.00869565	0.00739372	0	0	0	0
ac[agct]{0,2}t	0.00680272	0.00869565	0.0166359	0	0	0.0243902	0	0.0102041	0.0130435	0.0203327	0.0142857	0.0175439	0.00813008	0.0181818
gt[agct]{0,1}ga	0	0	0.00739372	0.00714286	0	0	0	0.00340136	0.00434783	0.00369686	0	0	0	0
ttg[agct]{0,1}a	0.00680272	0.00869565	0.00369686	0	0	0.0162602	0	0	0.00434783	0.00554529	0	0	0.00813008	0
ac[agct]{0,2}g	0.00340136	0.00434783	0.0184843	0.0214286	0	0.0162602	0.0181818	0.0204082	0.00869565	0.0147874	0.00714286	0.0350877	0.0243902	0.0181818
ac[agct]{0,2}c	0.0238095	0.0304348	0.012939	0.0142857	0.0175439	0.0162602	0	0.00340136	0.00869565	0.00924214	0.0214286	0	0.00813008	0.0181818
ac[agct]{0,2}a	0.0102041	0.0130435	0.0166359	0	0	0	0.0181818	0.0136054	0.00869565	0.0203327	0.0285714	0	0.0406504	0
g[agct]{0,1}gct	0.00680272	0.00869565	0.00184843	0.0142857	0	0	0.0181818	0.00340136	0	0.00739372	0.0142857	0	0	0
a[agct]{0,1}cat	0	0	0.00554529	0	0	0	0	0	0	0.00369686	0	0	0	0
g[agct]{0,1}gcg	0.00340136	0.00434783	0	0.00714286	0	0	0	0.0306122	0.00869565	0	0.00714286	0	0	0
a[agct]{0,1}cag	0	0	0.00369686	0.00714286	0	0	0	0	0.00869565	0.00369686	0	0.0175439	0	0
g[agct]{0,1}gcc	0.0238095	0.0304348	0.00184843	0.0214286	0	0	0	0.0238095	0.00869565	0.00554529	0.00714286	0	0.00813008	0
g[agct]{0,1}gca	0.00340136	0.00434783	0.00554529	0	0	0	0	0.00340136	0.00434783	0.00554529	0	0	0.00813008	0
a[agct]{0,1}cac	0	0	0.00924214	0.00714286	0	0	0	0.00340136	0.00434783	0.00369686	0.0142857	0	0.0243902	0.0181818
a[agct]{0,1}caa	0	0	0	0	0	0	0	0.00340136	0.00869565	0.00739372	0.00714286	0	0.0162602	0
cggc[agct]{0,1}	0.0170068	0.0217391	0.00184843	0.00714286	0	0	0	0.0272109	0.00869565	0	0.0142857	0.0175439	0	0
tatc[agct]{0,1}	0	0	0.00184843	0	0	0	0	0	0	0.00369686	0	0	0	0
ctgc[agct]{0,1}	0.00340136	0.00434783	0.00369686	0	0	0	0	0.00340136	0.00869565	0.00554529	0.00714286	0	0.00813008	0.0181818
g[agct]{0,1}gat	0.00340136	0.00434783	0	0	0.0350877	0.00813008	0	0	0.00869565	0.00369686	0.00714286	0.0175439	0	0
tagc[agct]{0,1}	0.00680272	0.00869565	0.00369686	0	0	0	0	0	0	0.00554529	0	0	0	0
[agct]{0,2}cgt	0.00680272	0.00869565	0.00924214	0.0285714	0	0.0162602	0	0.0102041	0.0130435	0.00924214	0.0142857	0.0175439	0.0162602	0.0181818
atc[agct]{0,2}	0.00340136	0.00434783	0.00739372	0.00714286	0.0175439	0	0	0.00340136	0.0130435	0.0110906	0.00714286	0.0350877	0.00813008	0.0181818
gg[agct]{0,1}ct	0.00680272	0.00869565	0.00184843	0.0142857	0	0	0.0181818	0.00340136	0.0130435	0	0.00714286	0	0.00813008	0
g[agct]{0,1}gag	0.00680272	0.00869565	0.00184843	0.0214286	0.0175439	0	0	0.00680272	0	0.00184843	0	0	0.00813008	0
g[agct]{0,1}gac	0	0	0	0.00714286	0	0	0	0.00340136	0	0	0	0	0	0
tc[agct]{0,1}ct	0.00340136	0.00434783	0	0	0.0175439	0	0	0.00340136	0	0.00369686	0.0214286	0	0	0
[agct]{0,2}cgg	0.0408163	0.0521739	0.00369686	0.0428571	0.0175439	0.00813008	0.0181818	0.0680272	0.0130435	0.00739372	0.0357143	0.0175439	0.00813008	0
g[agct]{0,1}gaa	0.00680272	0.00869565	0.00369686	0.00714286	0	0	0	0.00340136	0.00434783	0.00739372	0	0	0.00813008	0
[agct]{0,2}cgc	0.047619	0.0608696	0.00554529	0.0214286	0.0350877	0	0.0181818	0.0238095	0.0130435	0.00369686	0.0357143	0.0175439	0	0.0181818
gt[agct]{0,1}ct	0.00680272	0.00869565	0.00369686	0	0	0.00813008	0.0181818	0.00340136	0	0.00924214	0	0	0	0.0363636
[agct]{0,2}cga	0.0136054	0.0173913	0.00739372	0.00714286	0	0	0	0.00680272	0.0173913	0.00554529	0.0142857	0	0	0
gg[agct]{0,1}cg	0.0102041	0.0130435	0.00184843	0.0214286	0	0	0.0181818	0.0272109	0.0130435	0.00184843	0.00714286	0	0.00813008	0
gg[agct]{0,1}cc	0.0272109	0.0347826	0.00184843	0.0142857	0	0.00813008	0	0.0272109	0.00869565	0.00184843	0.0142857	0	0.00813008	0
tc[agct]{0,1}cg	0	0	0.00369686	0.00714286	0	0	0	0.00340136	0.00869565	0	0.00714286	0	0	0
gg[agct]{0,1}ca	0.00680272	0.00869565	0.00554529	0	0	0.00813008	0	0.00680272	0	0.00184843	0	0	0.00813008	0
tc[agct]{0,1}cc	0.00680272	0.00869565	0.00369686	0	0	0.00813008	0	0.00680272	0.00869565	0.00184843	0.00714286	0.0526316	0	0
tc[agct]{0,1}ca	0.00340136	0.00434783	0.00554529	0	0	0.00813008	0	0.00340136	0.00434783	0	0	0	0.00813008	0
gt[agct]{0,1}cg	0.00340136	0.00434783	0.00184843	0.00714286	0.0175439	0	0	0.00340136	0.00434783	0	0	0	0	0
gt[agct]{0,1}cc	0.00340136	0.00434783	0.00184843	0	0	0	0	0.00680272	0	0.00739372	0.00714286	0.0175439	0	0
gt[agct]{0,1}ca	0.00340136	0.00434783	0.00924214	0	0	0.00813008	0	0.00340136	0	0.00554529	0	0	0.00813008	0
tgta[agct]{0,1}	0.00340136	0.00434783	0.00369686	0	0.0175439	0.00813008	0	0	0	0.00369686	0.00714286	0	0	0
[agct]{0,1}cttt	0	0	0.00554529	0	0	0.0162602	0	0	0.00869565	0.00924214	0	0	0.00813008	0.0181818
ccaa[agct]{0,1}	0.00340136	0.00434783	0	0	0	0.00813008	0	0.00680272	0.00434783	0.00184843	0	0	0.0243902	0
aatg[agct]{0,1}	0	0	0.00739372	0	0	0	0.0181818	0	0.00434783	0.00184843	0	0	0.00813008	0
cccg[agct]{0,1}	0.0136054	0.0173913	0.00184843	0.0142857	0	0	0	0.0238095	0.00869565	0	0.0285714	0	0	0
[agct]{0,1}cttg	0.00340136	0.00434783	0.00184843	0	0	0	0	0	0.00434783	0.00554529	0	0	0.00813008	0
aagg[agct]{0,1}	0.00340136	0.00434783	0.00924214	0	0.0350877	0	0	0.00340136	0	0.00184843	0	0.0175439	0	0
[agct]{0,1}cttc	0.00340136	0.00434783	0.00554529	0	0.0175439	0.00813008	0	0.0102041	0.00434783	0.00369686	0.00714286	0.0350877	0.00813008	0
gg[agct]{0,1}at	0.00340136	0.00434783	0.00369686	0	0.0175439	0.00813008	0	0	0	0.00554529	0	0.0175439	0	0
[agct]{0,1}ctta	0	0	0.00554529	0	0	0.00813008	0.0363636	0	0	0.00739372	0	0	0	0
gacg[agct]{0,1}	0	0	0.00184843	0.00714286	0	0	0.0181818	0	0.00869565	0.00184843	0	0	0.00813008	0
tc[agct]{0,1}at	0	0	0.00184843	0	0	0	0	0	0	0.00554529	0	0	0	0.0181818
taca[agct]{0,1}	0	0	0.00369686	0.00714286	0	0	0	0.00340136	0	0.00369686	0	0.0175439	0.00813008	0
ct[agct]{0,3}	0.0578231	0.073913	0.0628466	0.0285714	0.0350877	0.0487805	0.0545455	0.0578231	0.0434783	0.0702403	0.0928571	0.0877193	0.0569106	0.0727273
gt[agct]{0,1}at	0.00340136	0.00434783	0	0	0	0.00813008	0	0	0.00869565	0.00369686	0.00714286	0	0	0
gg[agct]{0,1}ag	0.0102041	0.0130435	0.00739372	0.00714286	0.0350877	0.00813008	0.0181818	0.00680272	0.00434783	0	0	0	0.00813008	0
gg[agct]{0,1}ac	0.00680272	0.00869565	0.00739372	0.00714286	0.0175439	0	0	0.00340136	0.00434783	0.00184843	0	0	0	0
tc[agct]{0,1}ag	0.00340136	0.00434783	0.00369686	0	0	0	0	0.00680272	0	0	0	0	0	0
gg[agct]{0,1}aa	0.00340136	0.00434783	0.00369686	0.00714286	0	0	0	0	0.00434783	0	0	0	0.00813008	0.0181818
tc[agct]{0,1}ac	0.00340136	0.00434783	0.00369686	0	0	0	0	0	0.00434783	0.00739372	0.00714286	0	0	0
gt[agct]{0,1}ag	0	0	0.00184843	0.00714286	0	0	0.0181818	0.00340136	0.00869565	0.00369686	0	0	0	0
tc[agct]{0,1}aa	0.00340136	0.00434783	0.00184843	0	0	0.00813008	0	0.00680272	0	0.00369686	0	0	0.00813008	0.0181818
aca[agct]{0,2}	0.00680272	0.00869565	0.0277264	0.0142857	0	0.0162602	0	0.0102041	0.00869565	0.0166359	0.00714286	0.0175439	0.0487805	0
gt[agct]{0,1}ac	0	0	0	0.00714286	0	0	0	0	0	0	0.00714286	0	0	0
gt[agct]{0,1}aa	0	0	0.0110906	0	0	0	0	0.00340136	0	0.00739372	0.00714286	0	0	0
agat[agct]{0,1}	0	0	0.00184843	0	0	0	0	0	0.00434783	0	0	0	0	0
gcac[agct]{0,1}	0.00680272	0.00869565	0.0110906	0	0	0	0	0.00340136	0.00869565	0.00554529	0	0	0	0.0181818
atat[agct]{0,1}	0	0	0.00369686	0	0	0.00813008	0	0	0	0.00369686	0	0	0.00813008	0
cgtt[agct]{0,1}	0.00340136	0.00434783	0.00369686	0.0142857	0	0	0	0.00340136	0	0	0	0	0	0
[agct]{0,2}cct	0.0204082	0.026087	0.0110906	0.00714286	0.0175439	0	0.0181818	0.0136054	0.0173913	0.0240296	0.0285714	0.0526316	0.0243902	0.0363636
cggt[agct]{0,1}	0	0	0.00184843	0.00714286	0	0	0.0181818	0.0102041	0	0.00184843	0	0	0	0
cttt[agct]{0,1}	0	0	0.00554529	0	0	0.0162602	0	0	0.00869565	0.00924214	0	0	0.00813008	0.0181818
ac[agct]{0,1}tt	0	0	0.00184843	0	0	0.0243902	0	0	0.00434783	0.00554529	0	0	0	0.0181818
aat[agct]{0,1}t	0	0	0.00739372	0	0	0	0	0	0.00434783	0	0	0	0.0162602	0
[agct]{0,2}ccg	0.0680272	0.0869565	0.00739372	0.0357143	0.0175439	0.00813008	0	0.0408163	0.0130435	0.00369686	0.0428571	0.0175439	0.00813008	0.0181818
ccc[agct]{0,1}t	0.00680272	0.00869565	0.00554529	0	0.0175439	0	0	0.0102041	0.00434783	0.00554529	0.00714286	0.0526316	0	0
[agct]{0,2}ccc	0.047619	0.0608696	0.0147874	0.0142857	0.0175439	0.0162602	0	0.0578231	0.0391304	0.012939	0.1	0.0701754	0.00813008	0
[agct]{0,2}cca	0.0238095	0.0304348	0.00739372	0	0	0.0406504	0	0.0204082	0.026087	0.0184843	0.00714286	0.0350877	0.0243902	0.0363636
ccc[agct]{0,2}	0.047619	0.0608696	0.0147874	0.0142857	0.0175439	0.0162602	0	0.0578231	0.0304348	0.012939	0.1	0.0701754	0.00813008	0
ac[agct]{0,1}tg	0	0	0.00739372	0.0142857	0	0.00813008	0	0	0	0.00554529	0.00714286	0.0175439	0.0162602	0
aat[agct]{0,1}g	0	0	0	0	0	0	0.0181818	0	0.00434783	0.00739372	0	0	0	0
ac[agct]{0,1}tc	0	0	0.00369686	0	0	0.0162602	0	0	0.00434783	0.00369686	0.00714286	0	0	0
ccc[agct]{0,1}g	0.0170068	0.0217391	0.00184843	0	0	0	0	0.0340136	0.0130435	0.00369686	0.0285714	0	0	0
[agct]{0,1}tatt	0	0	0.00184843	0	0.0175439	0.0162602	0	0	0	0.00369686	0	0	0	0
ac[agct]{0,1}ta	0	0	0.00554529	0	0	0	0.0181818	0	0	0.00739372	0	0	0	0
aat[agct]{0,1}c	0	0	0.00184843	0	0	0	0	0	0	0.00184843	0	0.0175439	0.00813008	0.0181818
aat[agct]{0,1}a	0	0	0.00554529	0	0	0	0	0	0	0.00369686	0	0	0.00813008	0
cgag[agct]{0,1}	0.00340136	0.00434783	0.00184843	0.00714286	0	0	0	0.00340136	0.00434783	0.00184843	0	0	0	0
ccc[agct]{0,1}c	0.0170068	0.0217391	0.00369686	0.0142857	0	0.0162602	0	0.0102041	0.00434783	0.00184843	0.0642857	0	0	0
ccc[agct]{0,1}a	0.00680272	0.00869565	0.00369686	0	0	0	0	0.00340136	0.00869565	0.00184843	0	0.0175439	0.00813008	0
cact[agct]{0,1}	0	0	0.00184843	0	0	0	0	0.00340136	0.00434783	0.00739372	0.00714286	0.0175439	0	0.0181818
[agct]{0,1}tatg	0	0	0.00369686	0	0	0	0	0	0	0.00369686	0	0	0.00813008	0
[agct]{0,1}tatc	0	0	0.00184843	0	0	0	0	0	0	0.00369686	0	0	0	0
[agct]{0,1}tata	0	0	0.00554529	0	0	0	0	0	0	0.00554529	0	0	0	0
g[agct]{0,1}ctt	0.00340136	0.00434783	0	0	0	0.00813008	0.0181818	0.00680272	0.00869565	0.00369686	0	0.0175439	0.00813008	0
[agct]{0,2}cat	0	0	0.0166359	0	0.0175439	0.0162602	0	0	0.00869565	0.0184843	0	0.0175439	0	0.0181818
g[agct]{0,1}ctg	0.0102041	0.0130435	0.00739372	0.00714286	0.0175439	0	0	0.00680272	0.0130435	0.00184843	0.0142857	0	0.00813008	0
g[agct]{0,1}ctc	0.0102041	0.0130435	0	0.00714286	0	0	0	0.00340136	0.00434783	0	0.00714286	0	0.00813008	0
g[agct]{0,1}cta	0	0	0.00184843	0	0	0	0	0.00340136	0	0.00184843	0	0	0.00813008	0
[agct]{0,2}cag	0.0204082	0.026087	0.0221811	0.0428571	0.0175439	0.00813008	0.0181818	0.0204082	0.0391304	0.0184843	0.00714286	0.0175439	0	0.0181818
[agct]{0,2}cac	0.0204082	0.026087	0.0295749	0.0142857	0	0.0325203	0	0.0136054	0.0173913	0.0184843	0.0214286	0.0175439	0.0243902	0.0363636
agcc[agct]{0,1}	0.0102041	0.0130435	0	0.00714286	0	0.00813008	0	0.00340136	0.00434783	0	0.00714286	0.0175439	0.00813008	0
[agct]{0,2}caa	0.00680272	0.00869565	0.0166359	0	0	0.00813008	0	0.0136054	0.0173913	0.0166359	0.00714286	0	0.0650407	0
atcc[agct]{0,1}	0.00340136	0.00434783	0.00184843	0	0.0175439	0	0	0	0.00869565	0.00369686	0	0.0175439	0.00813008	0.0181818
gata[agct]{0,1}	0	0	0.00369686	0	0	0	0	0	0.00434783	0.00184843	0	0	0	0
ccga[agct]{0,1}	0.00340136	0.00434783	0.00369686	0.00714286	0	0	0	0	0.00869565	0.00184843	0.0142857	0	0	0
c[agct]{0,1}att	0	0	0.00739372	0	0	0	0	0	0	0	0	0	0	0.0181818
tgac[agct]{0,1}	0	0	0.00369686	0.00714286	0	0	0	0	0	0.00554529	0.00714286	0	0	0
gaga[agct]{0,1}	0	0	0	0.0142857	0.0175439	0	0	0.00340136	0.00434783	0.00369686	0	0	0.00813008	0
c[agct]{0,1}atg	0	0	0.00184843	0	0	0	0	0	0	0.00554529	0	0	0.00813008	0
ttac[agct]{0,1}	0	0	0.00184843	0.00714286	0	0	0	0	0	0.00369686	0	0	0	0
c[agct]{0,1}atc	0	0	0.00184843	0	0	0	0	0	0.00434783	0.00184843	0	0	0.00813008	0
gac[agct]{0,2}	0.00680272	0.00869565	0.00739372	0.00714286	0	0	0.0363636	0.0204082	0.00869565	0.0147874	0.00714286	0	0.00813008	0
c[agct]{0,1}ata	0	0	0.00369686	0	0	0.00813008	0	0	0.00434783	0.00184843	0	0	0	0
tac[agct]{0,2}	0	0	0.0166359	0.00714286	0.0175439	0.00813008	0	0.00340136	0	0.0110906	0	0.0350877	0.00813008	0
agtt[agct]{0,1}	0.00340136	0.00434783	0.00739372	0	0	0.00813008	0.0181818	0.00680272	0.00434783	0.00369686	0	0	0.0162602	0
[agct]{0,1}cgtt	0.00340136	0.00434783	0.00369686	0.0142857	0	0	0	0.00340136	0	0	0	0	0	0
aa[agct]{0,3}	0.0272109	0.0347826	0.0831793	0.0142857	0.0350877	0.0650407	0.109091	0.0170068	0.0782609	0.0924214	0.0714286	0.0350877	0.154472	0.0909091
aggt[agct]{0,1}	0	0	0.00554529	0	0	0	0	0	0.00434783	0.00369686	0	0	0	0
ggct[agct]{0,1}	0.00340136	0.00434783	0	0.00714286	0.0175439	0.00813008	0	0.0102041	0.00434783	0	0.00714286	0	0.00813008	0
cg[agct]{0,3}	0.108844	0.13913	0.025878	0.1	0.0526316	0.0243902	0.0363636	0.108844	0.0565217	0.025878	0.1	0.0526316	0.0243902	0.0363636
gctc[agct]{0,1}	0.0136054	0.0173913	0.00369686	0.0142857	0	0.00813008	0	0.00680272	0.00434783	0	0.00714286	0	0	0
attt[agct]{0,1}	0	0	0.00924214	0	0	0.0162602	0.0181818	0	0.00434783	0.00554529	0	0	0	0.0181818
[agct]{0,1}cgtg	0.00340136	0.00434783	0.00369686	0.0142857	0	0.00813008	0	0.00680272	0.00434783	0.00554529	0.00714286	0	0.0162602	0
tcct[agct]{0,1}	0.00680272	0.00869565	0	0	0	0	0.0181818	0.00340136	0	0.00739372	0	0	0	0.0363636
gcgc[agct]{0,1}	0.0102041	0.0130435	0.00184843	0.00714286	0	0	0	0.0102041	0.00434783	0.00184843	0.00714286	0	0	0
[agct]{0,1}cgtc	0	0	0.00184843	0	0	0.00813008	0	0	0.00869565	0.00184843	0.00714286	0	0	0.0181818
atgt[agct]{0,1}	0	0	0.00369686	0	0.0175439	0	0	0	0	0.00369686	0	0	0.00813008	0
[agct]{0,1}cgta	0	0	0	0	0	0	0	0	0	0.00184843	0	0.0175439	0	0
ca[agct]{0,1}tt	0.00340136	0.00434783	0.00924214	0	0	0	0	0.00340136	0.00869565	0.00739372	0	0	0	0.0181818
gtct[agct]{0,1}	0.0102041	0.0130435	0.00554529	0	0	0	0	0.00340136	0.00434783	0	0	0	0	0
[agct]{0,1}cagt	0.0102041	0.0130435	0.00924214	0.0142857	0	0	0.0181818	0.00680272	0.00434783	0.00184843	0	0	0	0
cct[agct]{0,2}	0.0204082	0.026087	0.0110906	0.00714286	0.0175439	0	0.0181818	0.0136054	0.0173913	0.025878	0.0285714	0.0526316	0.0243902	0.0363636
ca[agct]{0,2}t	0.0102041	0.0130435	0.025878	0.0142857	0.0175439	0.0325203	0	0.00340136	0.0173913	0.0295749	0.0142857	0	0.0243902	0.0181818
ca[agct]{0,1}tg	0	0	0.00554529	0.00714286	0	0.00813008	0.0181818	0	0	0.00554529	0.00714286	0	0.00813008	0.0181818
agag[agct]{0,1}	0	0	0	0.0214286	0.0175439	0.00813008	0	0	0.00869565	0.00184843	0	0	0.00813008	0
ca[agct]{0,1}tc	0.00680272	0.00869565	0.00184843	0.00714286	0	0	0	0.0102041	0	0.00369686	0	0.0175439	0.00813008	0
ca[agct]{0,1}ta	0	0	0.00184843	0	0	0	0	0	0	0	0	0	0	0
[agct]{0,1}cagg	0.00340136	0.00434783	0.00554529	0.00714286	0	0.00813008	0.0181818	0.0102041	0.0173913	0.00184843	0	0	0	0.0181818
[agct]{0,1}cagc	0.00340136	0.00434783	0.00554529	0.0214286	0	0	0	0	0.00434783	0.00554529	0.00714286	0.0175439	0	0
ca[agct]{0,2}g	0.0136054	0.0173913	0.0277264	0.0214286	0.0175439	0.00813008	0.0181818	0.0136054	0.026087	0.0147874	0.0142857	0	0.0162602	0.0363636
atag[agct]{0,1}	0	0	0.00369686	0	0	0	0	0	0.00434783	0.00369686	0	0	0	0
[agct]{0,1}caga	0.00340136	0.00434783	0.00184843	0	0.0175439	0	0	0.00340136	0.0130435	0.00924214	0	0	0	0
ca[agct]{0,2}c	0.0136054	0.0173913	0.0147874	0.0214286	0	0.0243902	0	0.0238095	0.026087	0.0184843	0.00714286	0.0526316	0.0325203	0
ca[agct]{0,2}a	0.0102041	0.0130435	0.0166359	0	0	0	0.0181818	0.00680272	0.0130435	0.00924214	0	0	0.0243902	0.0181818
cgtg[agct]{0,1}	0.00340136	0.00434783	0.00369686	0.0142857	0	0.00813008	0	0.00680272	0.00434783	0.00554529	0.00714286	0	0.0162602	0
tc[agct]{0,2}t	0.00680272	0.00869565	0.0166359	0.0285714	0.0175439	0	0	0.0102041	0.00434783	0.0166359	0.0214286	0	0.00813008	0.0181818
cggg[agct]{0,1}	0.0238095	0.0304348	0	0.0285714	0	0	0	0.0136054	0	0.00184843	0.0142857	0	0	0
[agct]{0,1}tttt	0	0	0.0184843	0	0	0	0	0	0	0.0147874	0	0	0	0.0363636
cttg[agct]{0,1}	0.00340136	0.00434783	0.00184843	0	0	0	0	0	0.00434783	0.00554529	0	0	0.00813008	0
tc[agct]{0,2}g	0.0170068	0.0217391	0.012939	0.0142857	0	0.00813008	0.0181818	0.0170068	0.0173913	0.00924214	0.00714286	0	0.00813008	0.0181818
ctgg[agct]{0,1}	0.00340136	0.00434783	0.00739372	0	0.0175439	0	0.0181818	0.0136054	0.00434783	0.00184843	0	0	0	0
tc[agct]{0,2}c	0.0204082	0.026087	0.0147874	0.0142857	0	0.00813008	0	0.0102041	0.0173913	0.012939	0.0357143	0.0701754	0.00813008	0
[agct]{0,1}tttg	0	0	0.00739372	0	0	0.0406504	0	0	0.0130435	0.00184843	0	0	0	0
tc[agct]{0,2}a	0.0102041	0.0130435	0.012939	0	0.0175439	0.0162602	0	0.0136054	0.00434783	0.0110906	0	0.0175439	0.0162602	0.0363636
[agct]{0,1}tttc	0	0	0.00924214	0.0214286	0	0	0.0181818	0	0.00434783	0.00924214	0	0	0.0162602	0.0181818
[agct]{0,1}ttta	0	0	0.00554529	0.00714286	0	0.00813008	0	0	0	0.00554529	0	0	0.00813008	0.0181818
aga[agct]{0,1}t	0.00340136	0.00434783	0	0	0.0175439	0	0	0.00340136	0	0.00184843	0	0	0	0
ata[agct]{0,1}t	0	0	0.00184843	0	0	0.00813008	0	0	0	0.00369686	0	0	0	0
aga[agct]{0,1}g	0.00340136	0.00434783	0.00184843	0.00714286	0	0.00813008	0	0	0.00434783	0.00554529	0	0	0	0
tggc[agct]{0,1}	0.00680272	0.00869565	0.00554529	0	0.0175439	0.00813008	0.0181818	0.00680272	0.00869565	0.00184843	0	0	0.0162602	0
cgt[agct]{0,1}t	0	0	0.00369686	0.00714286	0	0.00813008	0	0	0	0.00369686	0	0	0.00813008	0
aga[agct]{0,1}c	0.00340136	0.00434783	0	0	0	0	0	0.00340136	0.00869565	0.00184843	0	0	0.00813008	0
c[agct]{0,1}ttt	0	0	0.00739372	0.00714286	0	0	0	0	0	0.00924214	0	0	0	0.0363636
aga[agct]{0,1}a	0	0	0.00369686	0.0142857	0	0.00813008	0.0181818	0.00340136	0.0173913	0.0110906	0	0	0	0
ata[agct]{0,1}g	0	0	0.00369686	0	0	0	0	0	0.00434783	0.00369686	0	0	0.00813008	0
gtc[agct]{0,2}	0.0204082	0.026087	0.0147874	0.00714286	0	0.00813008	0	0.00680272	0.0130435	0.00739372	0.00714286	0	0	0.0363636
ttgc[agct]{0,1}	0	0	0.00554529	0	0	0.00813008	0	0	0.0173913	0.00369686	0	0	0	0
ctt[agct]{0,1}t	0.00340136	0.00434783	0.0110906	0	0	0	0	0.00340136	0	0.00554529	0	0	0	0.0181818
ata[agct]{0,1}c	0	0	0.00369686	0	0	0	0	0	0	0.00184843	0	0	0.00813008	0
cgt[agct]{0,1}g	0.00680272	0.00869565	0.00184843	0.0142857	0	0	0	0.00340136	0.00434783	0	0	0	0.00813008	0
ata[agct]{0,1}a	0	0	0.00739372	0	0	0	0	0	0	0.00369686	0	0.0175439	0	0
c[agct]{0,1}ttg	0.00680272	0.00869565	0.00184843	0.00714286	0	0.0162602	0	0	0.00869565	0.00554529	0	0	0	0
ggc[agct]{0,2}	0.0408163	0.0521739	0.012939	0.0428571	0.0350877	0.0325203	0.0181818	0.0680272	0.0347826	0.00554529	0.0285714	0.0175439	0.0243902	0
cgt[agct]{0,1}c	0	0	0	0	0	0.00813008	0	0.00680272	0	0.00554529	0	0.0175439	0	0.0181818
c[agct]{0,1}ttc	0	0	0	0	0.0175439	0	0	0.0102041	0.00434783	0.00739372	0	0.0350877	0.00813008	0
cgt[agct]{0,1}a	0	0	0.00369686	0.00714286	0	0	0	0	0.00869565	0	0.0142857	0	0	0
ttc[agct]{0,2}	0.00680272	0.00869565	0.0221811	0.0214286	0.0175439	0.00813008	0.0181818	0.0238095	0.00869565	0.0203327	0.00714286	0.0175439	0.0162602	0.0181818
c[agct]{0,1}tta	0	0	0.00369686	0	0	0.00813008	0	0	0	0.00369686	0	0	0	0
ctt[agct]{0,1}g	0.00340136	0.00434783	0.00369686	0	0	0.00813008	0.0181818	0.00340136	0.00869565	0.00554529	0	0	0.00813008	0
[agct]{0,1}cact	0	0	0.00184843	0	0	0	0	0.00340136	0.00434783	0.00739372	0.00714286	0.0175439	0	0.0181818
tgc[agct]{0,2}	0.00680272	0.00869565	0.0184843	0	0	0.00813008	0.0181818	0.0102041	0.0347826	0.025878	0.00714286	0.0175439	0.00813008	0.0181818
ctt[agct]{0,1}c	0	0	0	0	0	0.00813008	0	0.00340136	0.00869565	0.00739372	0	0.0175439	0.00813008	0
ctt[agct]{0,1}a	0	0	0.00369686	0	0.0175439	0.0162602	0.0181818	0	0	0.00739372	0.00714286	0	0.00813008	0
ta[agct]{0,3}	0.0102041	0.0130435	0.0554529	0.00714286	0.0526316	0.0406504	0.0545455	0.0102041	0.00869565	0.0554529	0.00714286	0.0526316	0.0406504	0.0545455
aa[agct]{0,1}tt	0	0	0.00924214	0	0	0.0162602	0.0181818	0	0.00869565	0.00924214	0	0	0.0162602	0.0181818
[agct]{0,1}cacg	0.00680272	0.00869565	0.00554529	0.00714286	0	0.0162602	0	0.00340136	0.00869565	0.00369686	0.0142857	0	0.00813008	0
cac[agct]{0,1}t	0	0	0.00739372	0.00714286	0	0.0243902	0	0	0.00869565	0.00924214	0.0142857	0	0.00813008	0
ga[agct]{0,3}	0.0510204	0.0652174	0.0480591	0.0714286	0.0877193	0.0487805	0.0727273	0.0544218	0.0695652	0.0573013	0.0642857	0.0350877	0.0325203	0.0181818
[agct]{0,1}cacc	0.00680272	0.00869565	0.00739372	0.00714286	0	0	0	0.00340136	0	0.00554529	0	0	0	0.0181818
[agct]{0,1}caca	0.00680272	0.00869565	0.0147874	0	0	0.0162602	0	0.00340136	0.00434783	0.00184843	0	0	0.0162602	0
aa[agct]{0,1}tg	0.00340136	0.00434783	0.00739372	0	0	0	0.0181818	0.00340136	0.00434783	0.00924214	0	0	0	0
aa[agct]{0,1}tc	0.00340136	0.00434783	0	0	0	0	0	0	0	0.00554529	0	0	0.00813008	0.0363636
cac[agct]{0,1}g	0.0136054	0.0173913	0.0110906	0	0	0	0	0.00340136	0.00434783	0.00739372	0.00714286	0	0	0.0363636
aa[agct]{0,1}ta	0	0	0.00554529	0	0	0	0	0	0	0.00369686	0	0	0.0243902	0
cac[agct]{0,1}c	0.00340136	0.00434783	0.00739372	0.00714286	0	0.00813008	0	0.00680272	0	0.00184843	0	0.0175439	0	0
cac[agct]{0,1}a	0.00340136	0.00434783	0.00369686	0	0	0	0	0.00340136	0.00434783	0	0	0	0.0162602	0
ct[agct]{0,2}t	0.00340136	0.00434783	0.0240296	0	0.0175439	0	0	0.00680272	0	0.0147874	0.0142857	0.0175439	0.00813008	0.0181818
c[agct]{0,2}tt	0.00680272	0.00869565	0.0221811	0.0214286	0.0175439	0	0	0.0136054	0.00869565	0.0203327	0.0142857	0.0175439	0.00813008	0.0545455
ggaa[agct]{0,1}	0.00680272	0.00869565	0.00924214	0.00714286	0.0175439	0	0	0	0.00434783	0.00184843	0	0	0.00813008	0.0181818
[agct]{0,1}ctgt	0.00680272	0.00869565	0.00369686	0	0	0	0	0.00340136	0.00434783	0.012939	0.00714286	0	0	0
cg[agct]{0,2}t	0.0102041	0.0130435	0.0110906	0.0142857	0.0175439	0.00813008	0	0.0170068	0.00869565	0.00924214	0.0142857	0.0175439	0.00813008	0.0181818
tcaa[agct]{0,1}	0	0	0.00924214	0	0	0	0	0	0	0.00554529	0.00714286	0	0.00813008	0
aggg[agct]{0,1}	0.0102041	0.0130435	0.00739372	0.0214286	0.0350877	0	0	0.0102041	0.00869565	0.00554529	0	0.0175439	0	0
ggcg[agct]{0,1}	0.00680272	0.00869565	0.00184843	0.0142857	0.0175439	0	0	0.0272109	0.00434783	0.00369686	0	0.0175439	0	0
ct[agct]{0,2}g	0.0204082	0.026087	0.0184843	0.0285714	0	0.0162602	0.0181818	0.0306122	0.0173913	0.0184843	0.0357143	0.0175439	0.0162602	0.0181818
attg[agct]{0,1}	0	0	0	0	0	0.0162602	0	0	0	0.00554529	0	0	0	0
gtaa[agct]{0,1}	0	0	0.00369686	0	0	0	0	0	0.00434783	0.00184843	0.00714286	0	0	0
c[agct]{0,2}tg	0.0136054	0.0173913	0.0147874	0.0142857	0	0.0162602	0.0363636	0.0136054	0.0130435	0.0277264	0.0214286	0.0175439	0.00813008	0.0181818
ct[agct]{0,2}c	0.0204082	0.026087	0.00924214	0	0	0.0162602	0.0181818	0.0136054	0.0217391	0.0221811	0.0285714	0.0350877	0.0162602	0.0363636
tccg[agct]{0,1}	0.0170068	0.0217391	0.00369686	0.00714286	0	0.00813008	0	0	0	0	0	0.0175439	0.00813008	0
ct[agct]{0,2}a	0.0136054	0.0173913	0.0110906	0	0.0175439	0.0162602	0.0181818	0.00680272	0.00434783	0.0147874	0.0142857	0.0175439	0.0162602	0
[agct]{0,1}ctgg	0.00340136	0.00434783	0.00739372	0	0.0175439	0	0.0181818	0.0136054	0.00434783	0.00184843	0	0	0	0.0181818
cg[agct]{0,2}g	0.0408163	0.0521739	0.00554529	0.0571429	0.0175439	0.00813008	0.0363636	0.047619	0.00434783	0.00554529	0.0285714	0.0175439	0.0162602	0
c[agct]{0,2}tc	0.0170068	0.0217391	0.00739372	0.0142857	0.0175439	0.00813008	0	0.0272109	0.0130435	0.012939	0.0357143	0.0526316	0.0162602	0
atgg[agct]{0,1}	0	0	0.00369686	0	0	0	0.0181818	0	0.00869565	0.00184843	0	0	0.00813008	0
c[agct]{0,2}ta	0.00680272	0.00869565	0.00924214	0	0	0.0162602	0	0.00340136	0.00434783	0.00924214	0	0.0175439	0	0
gtcg[agct]{0,1}	0	0	0.00184843	0	0	0	0	0.00340136	0	0	0	0	0	0
[agct]{0,1}ctgc	0.00340136	0.00434783	0.00369686	0	0	0	0	0.00340136	0.00869565	0.00554529	0.00714286	0	0.00813008	0.0181818
cg[agct]{0,2}c	0.0510204	0.0652174	0.00184843	0.0214286	0	0.00813008	0	0.037415	0.0217391	0.00554529	0.0357143	0.0175439	0	0.0181818
[agct]{0,1}caat	0	0	0.00554529	0	0	0	0	0	0	0	0	0	0.0162602	0
[agct]{0,1}ctga	0.00680272	0.00869565	0.00369686	0.00714286	0	0	0	0	0	0.00184843	0.0285714	0.0175439	0	0
cg[agct]{0,2}a	0.00680272	0.00869565	0.00739372	0.00714286	0.0175439	0	0	0.00680272	0.0217391	0.00554529	0.0214286	0	0	0
caa[agct]{0,2}	0.00680272	0.00869565	0.0166359	0	0	0.00813008	0	0.0102041	0.0173913	0.0166359	0.00714286	0	0.0731707	0
ccg[agct]{0,2}	0.0680272	0.0869565	0.00739372	0.0357143	0.0175439	0.00813008	0	0.0408163	0.0130435	0.00369686	0.0428571	0.0175439	0.00813008	0.0181818
gca[agct]{0,2}	0.0102041	0.0130435	0.025878	0.00714286	0.0175439	0.00813008	0.0181818	0.00680272	0.0347826	0.0184843	0	0	0.00813008	0.0181818
[agct]{0,1}caag	0	0	0.00554529	0	0	0.00813008	0	0.00340136	0.00434783	0.00184843	0	0	0	0
[agct]{0,1}gatt	0	0	0.00554529	0	0	0.00813008	0.0181818	0	0	0	0	0	0	0
[agct]{0,1}caac	0.00680272	0.00869565	0.00369686	0	0	0	0	0.00680272	0.00434783	0.00739372	0.00714286	0	0.00813008	0
[agct]{0,1}caaa	0	0	0.00184843	0	0	0	0	0	0.00869565	0.00739372	0	0	0.0406504	0
tca[agct]{0,2}	0.00680272	0.00869565	0.0240296	0.0357143	0.0175439	0	0	0.0102041	0.0130435	0.0184843	0.0214286	0	0.00813008	0
[agct]{0,1}gatg	0	0	0.00184843	0	0	0	0	0	0.00434783	0.00554529	0	0	0	0
[agct]{0,1}gatc	0.00340136	0.00434783	0	0.00714286	0.0175439	0	0	0.00340136	0.00869565	0	0.00714286	0.0175439	0	0
[agct]{0,1}gata	0	0	0.00369686	0	0	0	0	0	0.00434783	0.00184843	0	0	0	0
tgtt[agct]{0,1}	0	0	0.00739372	0.00714286	0	0.0243902	0	0	0	0.00554529	0.00714286	0	0	0
agt[agct]{0,1}t	0.00340136	0.00434783	0.00369686	0.00714286	0	0.00813008	0	0.00340136	0.00434783	0	0	0	0.0162602	0
[agct]{0,1}tgtt	0	0	0.00554529	0.00714286	0	0.0243902	0	0	0	0.00554529	0.00714286	0	0	0
tttt[agct]{0,1}	0	0	0.0184843	0	0	0	0	0	0	0.0147874	0	0	0	0.0363636
agg[agct]{0,1}t	0.00340136	0.00434783	0.00554529	0	0	0.00813008	0	0.00340136	0.00434783	0.00369686	0	0	0	0
ggc[agct]{0,1}t	0	0	0	0.00714286	0	0.00813008	0	0.00680272	0.0173913	0	0	0.0175439	0.0162602	0
ac[agct]{0,1}gt	0.00340136	0.00434783	0.00739372	0	0	0	0	0.00340136	0	0.00739372	0	0	0	0
att[agct]{0,1}t	0	0	0.00369686	0	0	0.00813008	0	0	0	0.00739372	0	0	0	0.0181818
ccat[agct]{0,1}	0	0	0.00184843	0	0	0.00813008	0	0	0.00434783	0.00369686	0	0	0	0.0181818
agt[agct]{0,1}g	0	0	0.0110906	0	0.0175439	0	0	0.00680272	0	0.00739372	0	0	0	0
tcc[agct]{0,1}t	0.00680272	0.00869565	0.00184843	0.00714286	0.0175439	0	0	0.00340136	0	0.00739372	0.00714286	0	0	0.0181818
[agct]{0,1}tgtg	0.00340136	0.00434783	0.00184843	0	0	0.0162602	0	0.00680272	0.00434783	0.0147874	0	0	0.0162602	0
agt[agct]{0,1}c	0.0102041	0.0130435	0.00554529	0	0	0	0.0181818	0.00340136	0	0.00369686	0	0	0.00813008	0.0181818
atg[agct]{0,1}t	0	0	0.00369686	0	0	0	0	0	0.00434783	0.00554529	0	0	0	0
agt[agct]{0,1}a	0	0	0.00369686	0.00714286	0	0	0.0181818	0	0.00434783	0.00369686	0	0	0	0
[agct]{0,1}tgtc	0.00340136	0.00434783	0.00554529	0	0	0	0	0	0	0.00369686	0	0	0	0
gaat[agct]{0,1}	0.00340136	0.00434783	0.00369686	0	0	0	0	0	0	0.00184843	0	0	0	0
gtc[agct]{0,1}t	0.0102041	0.0130435	0.00184843	0	0	0	0	0.00340136	0.00434783	0.00369686	0	0	0	0.0363636
agg[agct]{0,1}g	0.00680272	0.00869565	0.00739372	0.0142857	0.0526316	0	0	0.00680272	0.00434783	0.00739372	0	0	0	0
[agct]{0,1}tgta	0.00340136	0.00434783	0.00369686	0	0.0175439	0.00813008	0	0	0	0.00369686	0.00714286	0	0	0
ggc[agct]{0,1}g	0.0102041	0.0130435	0.00554529	0.0285714	0.0350877	0.00813008	0.0181818	0.0306122	0.00869565	0.00369686	0.00714286	0	0	0
ac[agct]{0,1}gg	0.00340136	0.00434783	0.00554529	0	0	0	0	0.0136054	0	0.00184843	0	0	0	0.0181818
att[agct]{0,1}g	0	0	0.00184843	0	0.0175439	0.0243902	0	0	0	0	0	0	0	0
agg[agct]{0,1}c	0	0	0.00184843	0.00714286	0	0.00813008	0.0363636	0.00680272	0.0130435	0	0.00714286	0	0	0
agg[agct]{0,1}a	0.00340136	0.00434783	0.00924214	0.00714286	0	0.00813008	0	0.00340136	0.00434783	0	0	0.0175439	0	0.0181818
ggc[agct]{0,1}c	0.0238095	0.0304348	0.00554529	0.00714286	0	0.00813008	0	0.0238095	0.00434783	0.00184843	0.0214286	0	0	0
ac[agct]{0,1}gc	0.0136054	0.0173913	0.00369686	0.00714286	0	0	0	0.00340136	0.00434783	0.00184843	0	0	0	0.0181818
tcc[agct]{0,1}g	0.0136054	0.0173913	0.00184843	0	0	0.00813008	0.0181818	0.00680272	0.00434783	0.00369686	0	0	0.00813008	0.0181818
att[agct]{0,1}c	0	0	0.00184843	0	0	0	0.0181818	0.00340136	0.00434783	0.00554529	0	0	0	0
ggc[agct]{0,1}a	0.00680272	0.00869565	0.00184843	0	0	0.00813008	0	0.00680272	0.00434783	0	0	0	0.00813008	0
[agct]{0,1}tagt	0	0	0.00184843	0	0	0	0	0	0	0.00369686	0	0	0	0
ac[agct]{0,1}ga	0.00680272	0.00869565	0.00184843	0	0	0	0	0	0.00434783	0.00554529	0.0285714	0	0	0
att[agct]{0,1}a	0	0	0.00554529	0	0	0	0	0	0	0.00184843	0	0	0	0
atg[agct]{0,1}g	0	0	0.00184843	0	0	0	0	0	0	0.00554529	0	0.0175439	0.00813008	0
tcc[agct]{0,1}c	0.00680272	0.00869565	0.00369686	0	0	0	0	0.00340136	0.0130435	0.00554529	0.00714286	0.0526316	0	0
gtc[agct]{0,1}g	0.00680272	0.00869565	0.00554529	0.00714286	0	0	0	0	0.00869565	0.00184843	0	0	0	0
tcc[agct]{0,1}a	0.00340136	0.00434783	0	0	0	0.0162602	0	0.00340136	0.00434783	0.00184843	0	0	0.00813008	0.0181818
tact[agct]{0,1}	0	0	0.00739372	0	0	0.00813008	0	0	0	0.00554529	0	0	0	0
atg[agct]{0,1}c	0	0	0.00369686	0	0	0	0	0	0	0.00184843	0	0	0.00813008	0
atg[agct]{0,1}a	0	0	0.00924214	0	0.0175439	0	0.0181818	0	0.00869565	0.00369686	0	0	0	0
gtc[agct]{0,1}c	0.00340136	0.00434783	0	0	0	0	0	0	0	0	0.00714286	0	0	0
gtc[agct]{0,1}a	0	0	0.00739372	0	0	0.00813008	0	0.00340136	0	0.00184843	0	0	0	0
[agct]{0,1}tagg	0	0	0.00369686	0	0.0175439	0.00813008	0.0181818	0.00680272	0.00434783	0.00369686	0	0	0	0
[agct]{0,1}tagc	0.00680272	0.00869565	0.00369686	0	0	0	0	0	0	0.00554529	0	0	0	0
[agct]{0,1}taga	0.00340136	0.00434783	0.00184843	0	0	0	0.0181818	0	0	0	0	0	0	0
act[agct]{0,2}	0.0136054	0.0173913	0.0147874	0	0	0.0243902	0.0181818	0.0136054	0.00434783	0.0240296	0.0142857	0.0175439	0.00813008	0.0363636
[agct]{0,1}ctct	0	0	0.00184843	0	0	0.00813008	0	0	0	0	0.0214286	0.0175439	0.00813008	0
aa[agct]{0,2}t	0	0	0.025878	0	0	0.0325203	0.0545455	0	0.0130435	0.0147874	0	0	0.0569106	0.0181818
g[agct]{0,1}cgt	0	0	0.00184843	0.00714286	0	0	0	0.00680272	0.00434783	0	0	0.0175439	0.00813008	0
[agct]{0,1}ctcg	0.00340136	0.00434783	0.00184843	0	0	0	0	0.00340136	0	0.00184843	0.00714286	0	0	0
aa[agct]{0,2}g	0.0136054	0.0173913	0.0203327	0.0142857	0.0175439	0.00813008	0.0545455	0.00680272	0.0130435	0.0221811	0.0214286	0.0175439	0	0
g[agct]{0,1}cgg	0.0170068	0.0217391	0	0.0142857	0.0175439	0	0	0.0238095	0.00434783	0.00369686	0	0	0	0
[agct]{0,1}ctcc	0.0170068	0.0217391	0.00184843	0.00714286	0	0.00813008	0	0.0102041	0.00434783	0.00184843	0.00714286	0.0175439	0.00813008	0
aa[agct]{0,2}c	0.0136054	0.0173913	0.0110906	0	0.0175439	0.00813008	0	0.00680272	0.0130435	0.0147874	0.0357143	0.0175439	0.0487805	0.0545455
c[agct]{0,1}gtt	0.00680272	0.00869565	0.00369686	0.0142857	0	0	0	0.0102041	0.00434783	0.00184843	0.00714286	0	0	0
[agct]{0,1}ctca	0.00340136	0.00434783	0.00739372	0.0142857	0	0	0	0.00340136	0.00434783	0.00739372	0.00714286	0	0	0
aa[agct]{0,2}a	0	0	0.025878	0	0	0.0162602	0	0.00340136	0.0391304	0.0406654	0.0142857	0	0.0487805	0.0181818
g[agct]{0,1}cgc	0.0136054	0.0173913	0.00184843	0.00714286	0.0175439	0	0.0181818	0.0136054	0.00434783	0.00184843	0	0	0	0
g[agct]{0,1}cga	0.00340136	0.00434783	0.00184843	0.00714286	0	0	0	0.00340136	0.00434783	0.00184843	0.00714286	0	0	0
gctg[agct]{0,1}	0	0	0.00554529	0.00714286	0.0175439	0	0	0.00340136	0.00434783	0.00554529	0.0214286	0	0	0
ggta[agct]{0,1}	0	0	0.00184843	0	0.0175439	0	0	0	0	0.00369686	0	0	0	0
c[agct]{0,1}gtg	0.00340136	0.00434783	0.00739372	0.00714286	0	0	0.0363636	0.0136054	0.00434783	0.0110906	0	0	0	0
c[agct]{0,1}gtc	0.0102041	0.0130435	0.00369686	0.00714286	0	0	0	0.00340136	0	0.00369686	0	0	0	0
tcta[agct]{0,1}	0	0	0	0	0	0	0	0.00340136	0	0.00184843	0	0	0	0.0181818
c[agct]{0,1}gta	0	0	0.00184843	0	0	0	0	0	0	0.00184843	0	0	0	0
ggga[agct]{0,1}	0.0102041	0.0130435	0.00184843	0.0142857	0.0350877	0.00813008	0	0.00340136	0	0.00184843	0	0.0175439	0.00813008	0
gtta[agct]{0,1}	0	0	0.00184843	0	0	0.00813008	0.0181818	0	0	0.00184843	0	0	0	0
tcga[agct]{0,1}	0.00680272	0.00869565	0	0	0	0	0	0.00680272	0	0	0	0	0	0
t[agct]{0,1}att	0	0	0.00369686	0	0	0.00813008	0	0	0	0.00554529	0	0	0	0
c[agct]{0,1}agt	0.00680272	0.00869565	0.00554529	0	0	0	0.0181818	0	0.00434783	0.00184843	0	0	0	0
gtga[agct]{0,1}	0.00340136	0.00434783	0.00184843	0.00714286	0	0	0	0.00680272	0.00434783	0.00739372	0.00714286	0	0	0
cta[agct]{0,2}	0.00680272	0.00869565	0.012939	0	0	0	0	0.0102041	0	0.0110906	0	0.0175439	0.00813008	0.0363636
t[agct]{0,1}atg	0	0	0.00369686	0	0	0	0	0	0.00434783	0.00369686	0	0	0	0
aatc[agct]{0,1}	0	0	0	0	0	0	0	0	0	0.00554529	0	0	0.00813008	0.0181818
c[agct]{0,1}agg	0.00340136	0.00434783	0.00369686	0.00714286	0	0	0	0.0102041	0.00434783	0	0	0	0	0.0181818
cga[agct]{0,2}	0.0136054	0.0173913	0.00739372	0.00714286	0	0	0	0.00680272	0.0173913	0.00554529	0.0142857	0	0	0
cccc[agct]{0,1}	0.0102041	0.0130435	0.00554529	0	0	0	0	0.0170068	0.00869565	0.00184843	0.05	0.0350877	0	0
t[agct]{0,1}atc	0.00340136	0.00434783	0.00184843	0.00714286	0	0	0	0	0.00434783	0.00184843	0.00714286	0	0	0
[agct]{0,1}ctat	0	0	0.00369686	0	0	0	0	0	0	0.00369686	0	0	0	0
c[agct]{0,1}agc	0.0102041	0.0130435	0.00184843	0	0	0.00813008	0	0.00340136	0	0.00554529	0	0.0175439	0	0
t[agct]{0,1}ata	0	0	0.00184843	0	0	0	0	0	0	0.00554529	0	0.0175439	0	0
c[agct]{0,1}aga	0.00340136	0.00434783	0	0	0	0	0	0.00340136	0.0130435	0.00554529	0	0	0	0
aagc[agct]{0,1}	0.00340136	0.00434783	0.00554529	0	0	0.00813008	0	0	0.0130435	0.00184843	0	0	0.00813008	0.0181818
[agct]{0,1}ctag	0.00680272	0.00869565	0.00184843	0	0	0	0	0.00680272	0	0.00184843	0	0	0	0
[agct]{0,1}gttt	0	0	0.00739372	0.0285714	0	0.0162602	0	0	0.00434783	0.00184843	0	0	0.0162602	0
[agct]{0,1}ctac	0	0	0.00554529	0	0	0	0	0.00340136	0	0.00184843	0	0	0	0
[agct]{0,1}ctaa	0	0	0.00184843	0	0	0	0	0	0	0.00369686	0	0.0175439	0.00813008	0.0363636
ac[agct]{0,1}ct	0.00340136	0.00434783	0.00184843	0	0	0	0	0.00680272	0.00434783	0.00554529	0.0142857	0.0175439	0	0
[agct]{0,1}cggt	0	0	0.00184843	0.00714286	0	0	0.0181818	0.0102041	0	0.00184843	0	0	0	0
[agct]{0,1}gttg	0.00680272	0.00869565	0.00739372	0.00714286	0	0.0162602	0	0.00680272	0	0.00369686	0	0	0	0
cg[agct]{0,1}tt	0	0	0.00369686	0.0142857	0	0	0	0.00340136	0	0.00184843	0	0	0	0
ac[agct]{0,1}cg	0	0	0.00369686	0.00714286	0	0.00813008	0.0181818	0.00340136	0.00434783	0.00369686	0	0	0.00813008	0
[agct]{0,1}gttc	0.00340136	0.00434783	0.00554529	0.00714286	0	0	0	0.0102041	0	0.00369686	0.00714286	0	0	0
[agct]{0,1}gtta	0	0	0.00184843	0	0	0.00813008	0.0181818	0	0	0.00184843	0	0	0	0
[agct]{0,1}cggg	0.0238095	0.0304348	0	0.0285714	0	0	0	0.0136054	0	0.00184843	0.0142857	0	0	0
ac[agct]{0,1}cc	0.00680272	0.00869565	0.00369686	0.00714286	0.0175439	0	0	0	0	0.00184843	0.00714286	0	0.00813008	0
[agct]{0,1}tact	0	0	0.00739372	0	0	0.00813008	0	0	0	0.00554529	0	0	0	0
ac[agct]{0,1}ca	0.00340136	0.00434783	0.00739372	0	0	0	0	0.0102041	0	0.00554529	0	0	0.0162602	0
[agct]{0,1}cggc	0.0170068	0.0217391	0.00184843	0.00714286	0	0	0	0.0272109	0.00869565	0	0.0142857	0.0175439	0	0
ct[agct]{0,1}tt	0	0	0.00739372	0	0	0	0	0	0	0.00369686	0.0142857	0	0.00813008	0.0181818
[agct]{0,1}cgga	0	0	0	0	0.0175439	0.00813008	0	0.0170068	0.00434783	0.00369686	0.00714286	0	0.00813008	0
ta[agct]{0,1}tt	0	0	0.00369686	0	0	0.0243902	0	0	0	0.00554529	0	0	0	0
ca[agct]{0,1}gt	0	0	0.00554529	0.00714286	0.0175439	0.0162602	0	0	0.00434783	0.00739372	0.0142857	0	0.00813008	0
cg[agct]{0,1}tg	0.00340136	0.00434783	0.00184843	0.00714286	0	0	0.0181818	0.00680272	0	0.00369686	0.0142857	0	0	0
cg[agct]{0,1}tc	0.00680272	0.00869565	0	0.00714286	0	0	0	0.00680272	0.00434783	0	0	0	0	0
cg[agct]{0,1}ta	0	0	0.00369686	0	0	0	0	0.00340136	0.00434783	0	0	0	0	0
[agct]{0,1}tacg	0	0	0.00184843	0	0.0175439	0	0	0	0	0	0	0	0	0
ct[agct]{0,1}tg	0.00340136	0.00434783	0.00554529	0	0	0.00813008	0	0.00340136	0.0130435	0.00924214	0	0.0175439	0	0
ta[agct]{0,1}tg	0	0	0	0	0	0	0	0	0	0.00184843	0	0	0	0
[agct]{0,1}tacc	0	0	0.00369686	0	0	0	0	0	0	0.00184843	0	0.0175439	0	0
ca[agct]{0,1}gg	0.00340136	0.00434783	0.00924214	0	0	0	0	0.00680272	0.0130435	0.00184843	0	0	0	0
[agct]{0,1}taca	0	0	0.00369686	0.00714286	0	0	0	0.00340136	0	0.00369686	0	0.0175439	0.00813008	0
ct[agct]{0,1}tc	0.00340136	0.00434783	0	0	0	0.00813008	0	0	0	0.00739372	0.0142857	0	0.00813008	0
ta[agct]{0,1}tc	0	0	0.00554529	0	0	0	0	0	0	0.00554529	0	0	0	0
ct[agct]{0,1}ta	0	0	0.00184843	0	0	0.00813008	0	0	0	0.00554529	0	0	0	0
ca[agct]{0,1}gc	0.00340136	0.00434783	0	0.00714286	0	0.0162602	0	0.00680272	0.0130435	0.00184843	0	0.0175439	0	0
ta[agct]{0,1}ta	0	0	0.00184843	0	0.0175439	0	0	0	0	0.00184843	0	0.0175439	0	0
gatt[agct]{0,1}	0	0	0.00554529	0	0	0.00813008	0.0181818	0	0	0	0	0	0	0
ccgt[agct]{0,1}	0.00340136	0.00434783	0.00184843	0.00714286	0	0	0	0.00680272	0	0.00184843	0	0	0	0
ca[agct]{0,1}ga	0.00340136	0.00434783	0.00739372	0	0	0	0.0181818	0.00340136	0.00434783	0.00184843	0	0	0	0.0181818
g[agct]{0,1}cct	0.00680272	0.00869565	0	0.00714286	0	0	0	0	0.00869565	0.00184843	0.00714286	0	0.00813008	0.0363636
gagt[agct]{0,1}	0.00340136	0.00434783	0.00369686	0	0.0175439	0.00813008	0	0.00680272	0.00434783	0.00184843	0	0	0	0
tgtg[agct]{0,1}	0.00340136	0.00434783	0.00184843	0	0	0.0162602	0	0.00680272	0.00434783	0.0147874	0	0	0.0162602	0
g[agct]{0,1}ccg	0.0238095	0.0304348	0	0.0214286	0	0	0	0.0136054	0.00869565	0.00184843	0.0142857	0	0	0
tggg[agct]{0,1}	0.00680272	0.00869565	0.00369686	0	0	0.00813008	0	0.0136054	0.00434783	0.00184843	0	0	0.0162602	0
[agct]{0,1}ttgt	0.00340136	0.00434783	0.00369686	0	0	0.0243902	0	0.00340136	0	0.00369686	0	0	0	0
ac[agct]{0,1}at	0	0	0.00554529	0	0	0	0	0	0.00434783	0.00184843	0	0	0.00813008	0
g[agct]{0,1}ccc	0.0170068	0.0217391	0.00369686	0	0	0.00813008	0	0.0340136	0.00434783	0.00554529	0.0285714	0	0	0
tttg[agct]{0,1}	0	0	0.00739372	0	0	0.0406504	0	0	0.0173913	0.00184843	0	0	0	0
g[agct]{0,1}cca	0.0170068	0.0217391	0.00184843	0	0	0.0243902	0	0.00340136	0.00434783	0.00184843	0	0	0.00813008	0
aaca[agct]{0,1}	0	0	0.00554529	0.00714286	0	0	0	0	0.00434783	0.00554529	0.00714286	0	0.0243902	0
ccag[agct]{0,1}	0.0136054	0.0173913	0.00184843	0	0	0	0.0181818	0.00340136	0.0130435	0.00739372	0	0.0175439	0	0.0181818
ttgg[agct]{0,1}	0.0102041	0.0130435	0.00184843	0	0	0.0243902	0	0.00340136	0.00434783	0	0	0	0.00813008	0
ac[agct]{0,1}ag	0	0	0.00184843	0	0	0	0	0.00340136	0.00434783	0.00369686	0	0.0175439	0	0
[agct]{0,1}ttgg	0.00680272	0.00869565	0.00184843	0	0	0.0243902	0	0.00340136	0.00434783	0	0	0	0.00813008	0
gaag[agct]{0,1}	0.0102041	0.0130435	0.00369686	0.00714286	0.0350877	0.00813008	0	0.00340136	0	0.00554529	0	0.0175439	0.00813008	0
a[agct]{0,2}tt	0	0	0.0147874	0	0	0.0569106	0.0181818	0	0.0217391	0.025878	0	0	0.0325203	0.0545455
[agct]{0,1}ttgc	0	0	0.00554529	0	0	0.00813008	0	0	0.0173913	0.00369686	0	0	0	0
ac[agct]{0,1}ac	0.00340136	0.00434783	0.00184843	0	0	0	0	0	0	0.00184843	0.00714286	0	0	0
[agct]{0,1}taat	0	0	0	0	0	0	0	0	0	0.00184843	0	0.0175439	0	0
ac[agct]{0,1}aa	0	0	0.00184843	0	0	0	0	0.00340136	0.00434783	0.00184843	0	0	0.0243902	0
[agct]{0,1}ttga	0	0	0.00554529	0.00714286	0	0.00813008	0	0	0	0.00924214	0	0	0	0
ag[agct]{0,2}t	0.0136054	0.0173913	0.0110906	0.0142857	0.0175439	0.0162602	0	0.0102041	0.0173913	0.0110906	0	0	0.0243902	0
at[agct]{0,3}	0.00340136	0.00434783	0.0554529	0.00714286	0.0526316	0.0406504	0.0363636	0.00680272	0.0347826	0.0554529	0.00714286	0.0701754	0.0406504	0.0363636
c[agct]{0,1}act	0.00680272	0.00869565	0.00739372	0	0	0	0	0	0	0.0110906	0	0.0175439	0	0
a[agct]{0,2}tg	0.00340136	0.00434783	0.0295749	0.0142857	0	0.0243902	0.0181818	0.0102041	0.00869565	0.025878	0.0142857	0.0175439	0.0325203	0
[agct]{0,1}taag	0	0	0.00739372	0	0	0	0	0	0.00434783	0.00554529	0	0	0.00813008	0.0363636
ag[agct]{0,2}g	0.0238095	0.0304348	0.0240296	0.0285714	0.0701754	0.00813008	0	0.0204082	0.0173913	0.025878	0.00714286	0	0	0
a[agct]{0,2}tc	0.0102041	0.0130435	0.00924214	0.00714286	0	0.0162602	0.0181818	0.00340136	0.0130435	0.0110906	0.00714286	0.0175439	0.00813008	0.0363636
a[agct]{0,2}ta	0	0	0.0240296	0	0.0175439	0	0.0363636	0	0	0.0147874	0	0	0.0243902	0
[agct]{0,1}taac	0	0	0.00184843	0	0	0	0	0	0	0.00184843	0	0	0.00813008	0.0181818
ag[agct]{0,2}c	0.0170068	0.0217391	0.0147874	0.0214286	0	0.00813008	0.0545455	0.0204082	0.0217391	0.00739372	0.0214286	0	0.0162602	0.0363636
[agct]{0,1}taaa	0	0	0.00554529	0	0	0.00813008	0.0181818	0	0	0.00554529	0.00714286	0	0.00813008	0
c[agct]{0,1}acg	0.00340136	0.00434783	0	0	0	0.00813008	0	0.00680272	0.00869565	0.00184843	0.0142857	0	0	0
ag[agct]{0,2}a	0.00340136	0.00434783	0.0184843	0.0285714	0	0.0243902	0.0363636	0.00680272	0.0304348	0.0184843	0	0.0350877	0.00813008	0.0181818
aaa[agct]{0,2}	0	0	0.0314233	0	0	0.0243902	0.0727273	0	0.0304348	0.0406654	0.0285714	0	0.0487805	0.0181818
c[agct]{0,1}acc	0.00680272	0.00869565	0.00369686	0	0	0	0	0.00680272	0	0.00184843	0	0	0.00813008	0.0181818
c[agct]{0,1}aca	0	0	0.00184843	0	0	0.0162602	0	0.00340136	0	0.00184843	0	0	0.00813008	0
g[agct]{0,1}cat	0	0	0.00184843	0	0	0.00813008	0	0	0.00434783	0.00369686	0	0	0	0
acg[agct]{0,2}	0.0102041	0.0130435	0.00924214	0.0142857	0.0175439	0.0162602	0.0181818	0.00680272	0.0217391	0.00924214	0.0285714	0	0.0162602	0
g[agct]{0,1}cag	0.00340136	0.00434783	0.00739372	0.00714286	0	0.00813008	0.0181818	0.0102041	0.0130435	0.00739372	0	0	0	0.0181818
g[agct]{0,1}cac	0.00680272	0.00869565	0.00369686	0	0	0.00813008	0	0.00680272	0	0.00184843	0.00714286	0.0175439	0	0.0181818
g[agct]{0,1}caa	0.00340136	0.00434783	0.00739372	0	0	0	0	0	0.00434783	0.00184843	0	0	0.00813008	0
[agct]{0,1}cgct	0.00680272	0.00869565	0	0.00714286	0	0	0	0.00680272	0.00434783	0.00184843	0.0142857	0	0	0
tgt[agct]{0,1}t	0.00340136	0.00434783	0.00739372	0.00714286	0.0175439	0.0243902	0	0	0	0.00739372	0	0	0	0
t[agct]{0,1}ttt	0	0	0.0184843	0.00714286	0	0.0243902	0	0	0	0.0110906	0	0	0.00813008	0
c[agct]{0,1}tgt	0.00680272	0.00869565	0.00554529	0	0.0175439	0.00813008	0	0	0	0.0110906	0	0	0.00813008	0
ttt[agct]{0,1}t	0	0	0.0221811	0	0	0.0162602	0	0	0	0.0110906	0	0	0.00813008	0.0181818
[agct]{0,1}cgcg	0.0102041	0.0130435	0	0.00714286	0	0	0.0181818	0.0102041	0.00434783	0	0.00714286	0	0	0.0181818
tgt[agct]{0,1}g	0.00340136	0.00434783	0.00184843	0	0	0.00813008	0	0	0	0.00184843	0	0	0.0162602	0
t[agct]{0,1}ttg	0	0	0.00184843	0	0	0.00813008	0	0	0	0	0	0	0	0
c[agct]{0,1}tgg	0.00340136	0.00434783	0.00554529	0.00714286	0	0	0.0181818	0.00680272	0.00869565	0	0	0	0.0162602	0
[agct]{0,1}cgcc	0.0272109	0.0347826	0.00369686	0	0.0175439	0	0	0.00680272	0.00434783	0.00184843	0.0142857	0.0175439	0	0
cca[agct]{0,1}t	0.00680272	0.00869565	0	0	0	0	0.0181818	0	0	0.00184843	0	0.0175439	0.00813008	0.0181818
tgt[agct]{0,1}c	0	0	0.00554529	0	0	0.00813008	0	0.00340136	0	0.0110906	0.00714286	0	0	0
[agct]{0,1}cgca	0.00340136	0.00434783	0.00184843	0.00714286	0.0175439	0	0	0	0	0	0	0	0	0
t[agct]{0,1}ttc	0.00340136	0.00434783	0.012939	0	0	0	0	0.00340136	0	0.00739372	0.0142857	0	0.00813008	0.0181818
tgt[agct]{0,1}a	0.00340136	0.00434783	0.00369686	0	0	0.00813008	0	0.00340136	0.00434783	0.00739372	0.00714286	0	0	0
ca[agct]{0,1}ct	0.00680272	0.00869565	0.00924214	0.00714286	0	0	0	0	0	0.012939	0	0	0	0
c[agct]{0,1}tgc	0.00340136	0.00434783	0	0	0	0	0	0.00340136	0.0130435	0.00554529	0	0.0175439	0.00813008	0.0181818
t[agct]{0,1}tta	0	0	0.00184843	0	0.0175439	0.00813008	0	0	0	0.00739372	0	0	0	0.0181818
c[agct]{0,1}aat	0	0	0	0	0	0	0	0	0.00434783	0.00184843	0	0.0175439	0.0243902	0
c[agct]{0,1}tga	0.00340136	0.00434783	0.00184843	0.00714286	0	0	0	0	0	0.00554529	0.0142857	0	0	0
gaa[agct]{0,1}t	0.00340136	0.00434783	0.00184843	0	0	0	0	0.00340136	0.00434783	0.00554529	0	0	0.00813008	0.0181818
ttt[agct]{0,1}g	0	0	0.00184843	0.00714286	0	0.0243902	0	0	0.00434783	0	0	0	0	0
ttt[agct]{0,1}c	0	0	0.00924214	0.00714286	0	0	0.0181818	0	0.0173913	0.00924214	0	0	0	0.0181818
cca[agct]{0,1}g	0.00680272	0.00869565	0	0	0	0.0162602	0	0.00340136	0.00869565	0.00554529	0.00714286	0	0	0.0181818
ttt[agct]{0,1}a	0	0	0.00739372	0.00714286	0	0.00813008	0	0	0	0.0110906	0	0	0.00813008	0.0363636
ca[agct]{0,1}cg	0.00680272	0.00869565	0.00369686	0.0142857	0	0	0	0.00340136	0.00434783	0.00184843	0.00714286	0	0	0.0181818
cca[agct]{0,1}c	0.0102041	0.0130435	0.00739372	0	0	0	0	0.0102041	0.00869565	0.00554529	0	0.0175439	0	0.0181818
c[agct]{0,1}aag	0.00340136	0.00434783	0.00554529	0	0	0.00813008	0	0.00340136	0	0.00369686	0	0	0.00813008	0.0181818
cca[agct]{0,1}a	0	0	0	0	0	0.0243902	0	0.00340136	0.00869565	0.00554529	0	0	0.0162602	0
aa[agct]{0,1}gt	0	0	0.00554529	0	0	0	0.0181818	0	0	0.00184843	0	0	0.0243902	0
ca[agct]{0,1}cc	0.00340136	0.00434783	0.00554529	0.00714286	0	0	0	0.00340136	0.00869565	0.00369686	0.00714286	0.0175439	0.00813008	0
gaa[agct]{0,1}g	0.0102041	0.0130435	0.00739372	0	0.0350877	0.00813008	0	0	0.0130435	0	0	0.0175439	0	0
ca[agct]{0,1}ca	0	0	0.00369686	0	0	0	0	0.00340136	0	0.00184843	0	0	0.00813008	0
c[agct]{0,1}aac	0.00680272	0.00869565	0	0	0	0	0	0.00680272	0.00869565	0.00554529	0.00714286	0	0.0162602	0.0181818
tac[agct]{0,1}t	0	0	0.00554529	0	0	0.00813008	0	0	0	0.00554529	0	0.0175439	0	0
c[agct]{0,1}aaa	0	0	0	0	0	0	0	0	0.00869565	0.00184843	0.00714286	0	0.0243902	0
gaa[agct]{0,1}c	0.00680272	0.00869565	0.00369686	0	0	0.00813008	0	0	0.00434783	0.00369686	0.0285714	0	0	0
gaa[agct]{0,1}a	0.00340136	0.00434783	0.00739372	0.0142857	0	0.00813008	0.0181818	0.00340136	0.00434783	0.012939	0	0	0	0
aa[agct]{0,1}gg	0.00680272	0.00869565	0.00739372	0	0.0175439	0	0.0181818	0.00340136	0.00434783	0.00184843	0.00714286	0.0175439	0	0
tac[agct]{0,1}g	0	0	0.00184843	0	0	0	0	0	0	0.00184843	0	0	0	0
aa[agct]{0,1}gc	0	0	0.00739372	0	0.0175439	0	0	0	0.00869565	0	0.00714286	0	0	0
aa[agct]{0,1}ga	0	0	0.00554529	0	0	0.00813008	0	0.00340136	0.0130435	0.00924214	0	0	0	0
tac[agct]{0,1}c	0	0	0.00554529	0.00714286	0.0175439	0	0	0	0	0.00369686	0	0	0	0
cc[agct]{0,3}	0.159864	0.204348	0.0406654	0.0571429	0.0526316	0.0650407	0.0363636	0.129252	0.0869565	0.0609982	0.178571	0.175439	0.0650407	0.109091
tac[agct]{0,1}a	0	0	0.00369686	0	0	0	0	0.00340136	0	0	0	0.0175439	0.00813008	0
[agct]{0,1}ttct	0	0	0.012939	0	0	0	0	0.00680272	0	0.00369686	0	0	0.00813008	0.0181818
[agct]{0,1}cgat	0	0	0.00369686	0	0	0	0	0	0.00434783	0.00184843	0	0	0	0
c[agct]{0,2}gt	0.0204082	0.026087	0.0147874	0.00714286	0.0350877	0.0243902	0.0181818	0.00340136	0.00869565	0.0184843	0.0214286	0	0.0162602	0.0181818
[agct]{0,1}ttcg	0.00340136	0.00434783	0	0.0142857	0	0	0	0.00680272	0	0.00184843	0	0	0	0
[agct]{0,1}cgag	0.00340136	0.00434783	0.00184843	0.00714286	0	0	0	0.00340136	0.00434783	0.00184843	0	0	0	0
[agct]{0,1}ttcc	0	0	0.00184843	0	0	0.00813008	0.0181818	0.00680272	0.00869565	0.00924214	0.00714286	0.0175439	0	0
[agct]{0,1}ggtt	0.00340136	0.00434783	0.00369686	0.0214286	0	0.00813008	0	0.00680272	0	0.00184843	0	0	0	0
[agct]{0,1}ttca	0.00340136	0.00434783	0.00739372	0.00714286	0.0175439	0	0	0.00340136	0	0.00554529	0.00714286	0	0.00813008	0
[agct]{0,1}cgac	0.00340136	0.00434783	0	0	0	0	0	0	0	0.00184843	0	0	0	0
c[agct]{0,2}gg	0.0510204	0.0652174	0.0147874	0.05	0	0	0.0363636	0.0680272	0.0304348	0.00184843	0.0214286	0	0.0162602	0.0181818
[agct]{0,1}cgaa	0.00680272	0.00869565	0.00184843	0	0	0	0	0.00340136	0.00869565	0	0.0142857	0	0	0
ca[agct]{0,1}at	0	0	0.00184843	0	0	0.0162602	0	0	0.00434783	0.00184843	0	0	0.0162602	0
agac[agct]{0,1}	0.00340136	0.00434783	0	0	0	0	0	0.0102041	0.00434783	0.00554529	0	0	0	0
c[agct]{0,2}gc	0.0442177	0.0565217	0.00739372	0.0285714	0	0.0162602	0.0181818	0.0442177	0.0347826	0.012939	0.0357143	0.0350877	0.00813008	0.0181818
c[agct]{0,2}ga	0.0170068	0.0217391	0.00924214	0.00714286	0	0.00813008	0.0181818	0.0170068	0.0173913	0.012939	0.0142857	0	0.00813008	0.0181818
[agct]{0,1}ggtg	0.00340136	0.00434783	0.00554529	0	0	0	0.0181818	0.00680272	0.00869565	0.00739372	0.00714286	0	0	0
atac[agct]{0,1}	0	0	0.00554529	0	0	0	0	0	0	0.00184843	0	0.0175439	0	0
[agct]{0,1}ggtc	0.0102041	0.0130435	0.00369686	0	0	0	0	0	0.00434783	0	0	0	0	0
ca[agct]{0,1}ag	0.00340136	0.00434783	0.00924214	0	0.0175439	0	0	0.00340136	0.00869565	0.00554529	0	0	0.00813008	0
[agct]{0,1}ggta	0	0	0.00184843	0	0.0175439	0	0	0	0	0.00369686	0	0	0	0
ca[agct]{0,1}ac	0	0	0.00739372	0	0	0.00813008	0	0.00340136	0.00434783	0.00924214	0	0	0.0162602	0
cgtc[agct]{0,1}	0	0	0.00184843	0	0	0.00813008	0	0	0.00869565	0.00184843	0.00714286	0	0	0.0181818
ca[agct]{0,1}aa	0.00680272	0.00869565	0.00369686	0	0	0	0	0	0.00869565	0.00554529	0	0	0.0162602	0
[agct]{0,1}gagt	0.00340136	0.00434783	0.00369686	0	0.0175439	0.00813008	0	0.00680272	0.00434783	0.00184843	0	0	0	0
gatg[agct]{0,1}	0	0	0.00184843	0	0	0	0	0	0.00434783	0.00554529	0	0	0	0
cttc[agct]{0,1}	0.00340136	0.00434783	0.00554529	0	0.0175439	0.00813008	0	0.0102041	0.00434783	0.00369686	0.00714286	0.0175439	0.00813008	0
gagg[agct]{0,1}	0.00680272	0.00869565	0.00554529	0.0214286	0	0.00813008	0	0	0.00434783	0.00369686	0.00714286	0	0	0
tt[agct]{0,3}	0.0204082	0.026087	0.0942699	0.0571429	0.0350877	0.146341	0.0909091	0.0306122	0.0521739	0.0831793	0.00714286	0.0175439	0.0487805	0.109091
[agct]{0,1}gagg	0.00680272	0.00869565	0.00739372	0.0214286	0	0.00813008	0	0	0.00434783	0.00369686	0.00714286	0	0	0
[agct]{0,1}ttat	0	0	0.00369686	0	0	0.00813008	0	0	0	0.00369686	0	0	0	0
gt[agct]{0,3}	0.047619	0.0608696	0.0665434	0.0714286	0.0526316	0.0731707	0.0545455	0.0442177	0.0391304	0.064695	0.0357143	0.0175439	0.0569106	0.0363636
[agct]{0,1}gagc	0.00680272	0.00869565	0	0.00714286	0	0	0	0.0136054	0.00434783	0.00369686	0.0142857	0	0.00813008	0
[agct]{0,1}gaga	0	0	0	0.0142857	0.0175439	0	0	0.00340136	0.00434783	0.00369686	0	0	0.00813008	0
c[agct]{0,1}tct	0	0	0.00554529	0	0	0	0	0.00340136	0	0.00184843	0.00714286	0	0.00813008	0
[agct]{0,1}ttag	0	0	0.00369686	0	0.0175439	0.00813008	0.0363636	0	0	0.00184843	0	0	0	0
acct[agct]{0,1}	0	0	0.00369686	0	0	0	0	0	0	0.00554529	0	0	0	0
aga[agct]{0,2}	0.0102041	0.0130435	0.00554529	0.0214286	0.0175439	0.0162602	0.0181818	0.0102041	0.0304348	0.0203327	0	0	0.00813008	0
[agct]{0,1}ttac	0	0	0.00184843	0.00714286	0	0	0	0	0	0.00369686	0	0	0	0
cacc[agct]{0,1}	0.00680272	0.00869565	0.00739372	0.00714286	0	0	0	0.00340136	0	0.00554529	0	0	0	0.0181818
[agct]{0,1}ttaa	0	0	0.00554529	0	0	0.00813008	0.0181818	0	0	0.00554529	0	0	0.00813008	0.0181818
c[agct]{0,1}tcg	0.00340136	0.00434783	0.00184843	0	0	0	0	0.00340136	0	0.00184843	0.00714286	0	0	0
[agct]{0,1}tggt	0.00340136	0.00434783	0	0.00714286	0.0175439	0.00813008	0	0	0.00434783	0.00184843	0	0	0	0
c[agct]{0,1}tcc	0	0	0.00184843	0	0	0.0162602	0	0.0102041	0.00869565	0.00554529	0.00714286	0.0175439	0	0.0181818
c[agct]{0,1}tca	0	0	0.00739372	0.00714286	0.0175439	0	0	0	0.0130435	0.00554529	0.0142857	0	0.00813008	0
ggat[agct]{0,1}	0	0	0.00369686	0	0.0175439	0.00813008	0.0181818	0.00340136	0.00434783	0.00184843	0	0.0175439	0	0
ag[agct]{0,3}	0.0578231	0.073913	0.0683919	0.0928571	0.0877193	0.0569106	0.0909091	0.0578231	0.0869565	0.0628466	0.0285714	0.0350877	0.0487805	0.0545455
tcat[agct]{0,1}	0	0	0.00554529	0	0	0	0	0	0.00434783	0.00739372	0	0	0	0
[agct]{0,1}tggg	0.00680272	0.00869565	0.00369686	0	0	0.00813008	0	0.0136054	0.00434783	0.00184843	0	0	0.0162602	0
gtat[agct]{0,1}	0	0	0.00184843	0	0.0175439	0	0	0	0	0.00554529	0	0	0	0
aa[agct]{0,1}ct	0	0	0.00369686	0	0	0.0162602	0	0	0.00434783	0.00184843	0	0	0.00813008	0
[agct]{0,1}tggc	0.00680272	0.00869565	0.00554529	0	0.0175439	0.00813008	0.0363636	0.00680272	0.00869565	0.00184843	0	0	0.0162602	0
[agct]{0,1}tgga	0.00340136	0.00434783	0.00924214	0	0	0	0.0181818	0.00340136	0.00869565	0.00184843	0	0	0.00813008	0
cat[agct]{0,2}	0	0	0.0166359	0	0.0175439	0.0162602	0	0.00340136	0.00869565	0.0184843	0	0.0175439	0	0.0181818
aa[agct]{0,1}cg	0.00340136	0.00434783	0.00184843	0	0	0	0	0	0	0.00369686	0.0142857	0	0	0
gc[agct]{0,1}tt	0	0	0	0.00714286	0	0	0	0	0.00869565	0.00739372	0	0.0175439	0	0
aa[agct]{0,1}cc	0.00680272	0.00869565	0	0	0	0.00813008	0	0.00340136	0	0.00554529	0.0214286	0	0.0162602	0.0181818
aa[agct]{0,1}ca	0	0	0.00369686	0	0	0	0	0	0.0130435	0.00739372	0.0142857	0	0.0162602	0.0181818
gat[agct]{0,1}t	0	0	0.00369686	0	0	0	0.0181818	0	0	0	0	0	0	0
ccg[agct]{0,1}t	0.00680272	0.00869565	0.00184843	0.00714286	0	0	0	0.00680272	0	0.00184843	0.00714286	0	0	0
gag[agct]{0,1}t	0	0	0.00554529	0	0.0175439	0.00813008	0	0.00680272	0.00434783	0.00184843	0.00714286	0	0	0
c[agct]{0,1}tat	0	0	0.00369686	0	0	0.00813008	0	0	0	0.00369686	0	0	0	0
cgca[agct]{0,1}	0.00340136	0.00434783	0.00184843	0.00714286	0.0175439	0	0	0	0	0	0	0	0	0
gc[agct]{0,1}tg	0.00680272	0.00869565	0.00184843	0	0.0175439	0	0	0.00340136	0.0173913	0	0.00714286	0	0.0162602	0
c[agct]{0,2}ct	0.0204082	0.026087	0.025878	0.00714286	0	0	0	0.0238095	0.00434783	0.0240296	0.0285714	0.0701754	0.00813008	0
gat[agct]{0,1}g	0	0	0.00184843	0	0	0.00813008	0	0	0.0130435	0.00184843	0	0	0	0
ccg[agct]{0,1}g	0.0340136	0.0434783	0	0.0214286	0	0	0	0.0102041	0.00434783	0.00184843	0.00714286	0	0	0.0181818
gc[agct]{0,1}tc	0	0	0.00369686	0.00714286	0	0	0	0.00340136	0.00869565	0.00554529	0	0	0.00813008	0.0181818
gc[agct]{0,1}ta	0	0	0.00369686	0	0	0.00813008	0.0181818	0	0	0.00184843	0	0.0175439	0.00813008	0
gat[agct]{0,1}c	0.00340136	0.00434783	0.00369686	0	0.0175439	0	0	0	0.00434783	0.00369686	0	0.0175439	0	0
ccg[agct]{0,1}c	0.0238095	0.0304348	0.00369686	0	0	0	0	0.0170068	0.00434783	0	0.0142857	0.0175439	0	0
gat[agct]{0,1}a	0	0	0.00184843	0.00714286	0	0	0	0.00340136	0	0.00184843	0.00714286	0	0	0
ccg[agct]{0,1}a	0.00340136	0.00434783	0.00184843	0.00714286	0.0175439	0.00813008	0	0.00680272	0.00434783	0	0.0142857	0	0.00813008	0
gag[agct]{0,1}g	0.0136054	0.0173913	0	0.0357143	0.0175439	0	0	0.00680272	0	0.00184843	0.00714286	0	0.00813008	0
ctca[agct]{0,1}	0.00340136	0.00434783	0.00739372	0.0142857	0	0	0	0.00340136	0.00434783	0.00739372	0.00714286	0	0	0
c[agct]{0,1}tag	0.00680272	0.00869565	0.00184843	0	0	0	0.0181818	0	0	0.00369686	0	0	0	0
c[agct]{0,2}cg	0.047619	0.0608696	0.00554529	0.0285714	0.0175439	0.0162602	0	0.0408163	0.00869565	0.00554529	0.0571429	0.0175439	0.00813008	0.0363636
gag[agct]{0,1}c	0.00340136	0.00434783	0	0.00714286	0	0.00813008	0	0.0102041	0	0	0.00714286	0	0	0
gag[agct]{0,1}a	0	0	0.00369686	0	0	0	0	0	0.0130435	0.00924214	0	0	0.00813008	0
c[agct]{0,1}tac	0	0	0.00554529	0	0	0	0	0	0	0.00554529	0	0.0175439	0	0
c[agct]{0,1}taa	0	0	0.00184843	0	0	0.00813008	0.0181818	0	0	0.00369686	0	0.0175439	0.00813008	0.0181818
c[agct]{0,2}cc	0.0612245	0.0782609	0.012939	0.0142857	0	0.0162602	0	0.0340136	0.0304348	0.0147874	0.0714286	0.0701754	0.0162602	0.0545455
c[agct]{0,2}ca	0.0102041	0.0130435	0.0166359	0.0142857	0.0350877	0.0162602	0	0.0102041	0.026087	0.00924214	0.0142857	0	0.0162602	0
t[agct]{0,1}gtt	0	0	0.00554529	0.00714286	0	0.00813008	0	0	0	0.00184843	0	0	0	0
c[agct]{0,1}ggt	0.00340136	0.00434783	0	0	0.0175439	0	0	0	0	0.00184843	0.00714286	0	0	0
aa[agct]{0,1}at	0	0	0.00739372	0	0	0	0.0181818	0	0	0.00184843	0	0	0.00813008	0
t[agct]{0,1}gtg	0.00340136	0.00434783	0	0	0	0.0162602	0	0.00340136	0	0.00369686	0	0	0	0
c[agct]{0,1}ggg	0.0340136	0.0434783	0.00369686	0.0285714	0	0	0	0.0170068	0.00869565	0.00184843	0	0	0	0
t[agct]{0,1}gtc	0	0	0.00369686	0	0	0	0	0	0.00434783	0.00184843	0	0	0	0
c[agct]{0,1}ggc	0.0136054	0.0173913	0.00554529	0.0142857	0	0.00813008	0.0181818	0.0340136	0.0173913	0	0.0142857	0	0	0
[agct]{0,1}gact	0.00680272	0.00869565	0.00184843	0	0	0	0.0181818	0.00680272	0	0.00369686	0.00714286	0	0	0
t[agct]{0,1}gta	0.00340136	0.00434783	0	0	0.0175439	0.00813008	0	0	0	0.00369686	0	0	0	0
c[agct]{0,1}gga	0.00680272	0.00869565	0.00369686	0	0	0.00813008	0.0181818	0.0136054	0	0.00184843	0	0	0.00813008	0.0181818
aa[agct]{0,1}ag	0	0	0.00369686	0.0142857	0	0.00813008	0.0181818	0	0.00434783	0.00739372	0	0	0	0
t[agct]{0,1}agt	0.00340136	0.00434783	0.00554529	0.0142857	0	0	0	0.00680272	0	0.00554529	0	0	0	0.0181818
aa[agct]{0,1}ac	0.00340136	0.00434783	0.00369686	0	0	0	0	0.00340136	0.00434783	0.00369686	0.00714286	0.0175439	0.0243902	0
agtc[agct]{0,1}	0.00680272	0.00869565	0.00369686	0.00714286	0	0	0	0.00680272	0	0.00184843	0	0	0	0.0181818
aa[agct]{0,1}aa	0	0	0.0110906	0	0	0.00813008	0	0	0.0130435	0.0203327	0	0	0.00813008	0
[agct]{0,1}gacg	0	0	0.00184843	0.00714286	0	0	0.0181818	0	0.00869565	0.00184843	0	0	0.00813008	0
aggc[agct]{0,1}	0	0	0.00369686	0.00714286	0.0175439	0.0243902	0	0.00340136	0.00869565	0.00184843	0.00714286	0	0	0
[agct]{0,1}cctt	0.00340136	0.00434783	0.00184843	0	0.0175439	0	0	0.00340136	0.00434783	0.00924214	0	0.0350877	0	0
[agct]{0,1}gacc	0	0	0	0	0	0	0	0.0102041	0	0.00369686	0	0	0	0
[agct]{0,1}gaca	0	0	0.00369686	0	0	0	0	0.00340136	0	0.00554529	0	0	0	0
ggcc[agct]{0,1}	0.0238095	0.0304348	0.00184843	0.0214286	0	0.0162602	0	0.0238095	0.0173913	0.00184843	0.0214286	0	0.0162602	0
attc[agct]{0,1}	0	0	0.00184843	0	0	0	0	0.00340136	0	0.00369686	0	0	0	0
t[agct]{0,1}agg	0	0	0.00739372	0.00714286	0.0175439	0.00813008	0.0181818	0.00340136	0.00434783	0.00369686	0.00714286	0	0	0
c[agct]{0,2}at	0	0	0.0110906	0	0.0175439	0.0162602	0	0.00340136	0.00869565	0.00924214	0	0.0175439	0.0243902	0
tccc[agct]{0,1}	0.00340136	0.00434783	0.00184843	0	0.0175439	0.00813008	0	0.0102041	0.0173913	0.00184843	0.0142857	0.0350877	0.00813008	0
t[agct]{0,1}agc	0	0	0.00554529	0.0142857	0	0	0	0	0.00869565	0.00369686	0.0142857	0	0.00813008	0.0181818
t[agct]{0,1}aga	0	0	0.00184843	0	0.0175439	0	0.0181818	0	0	0.00554529	0	0	0	0
atgc[agct]{0,1}	0	0	0.00369686	0	0	0	0	0	0.00434783	0.00554529	0	0.0175439	0	0
gtcc[agct]{0,1}	0.0102041	0.0130435	0.00184843	0	0	0.00813008	0	0	0	0.00369686	0	0	0	0.0363636
[agct]{0,1}cctg	0.0102041	0.0130435	0.00184843	0	0	0	0.0181818	0.00340136	0.00869565	0.00554529	0.00714286	0	0.00813008	0.0181818
[agct]{0,1}cctc	0	0	0.00369686	0.00714286	0	0	0	0.00680272	0.00434783	0.00554529	0.0214286	0	0.00813008	0
[agct]{0,1}ccta	0.00680272	0.00869565	0.00369686	0	0	0	0	0	0	0.00369686	0	0.0175439	0.00813008	0.0181818
c[agct]{0,2}ag	0.0306122	0.0391304	0.0184843	0.0357143	0.0175439	0.0162602	0.0181818	0.0204082	0.026087	0.0184843	0.0285714	0	0.0162602	0.0181818
[agct]{0,1}tgct	0	0	0.0110906	0	0	0.00813008	0.0181818	0	0.00434783	0.00739372	0	0	0	0
c[agct]{0,2}ac	0.0170068	0.0217391	0.0147874	0	0	0.0243902	0	0.0170068	0.0173913	0.0184843	0.0142857	0.0175439	0.0162602	0.0181818
c[agct]{0,2}aa	0.0102041	0.0130435	0.00924214	0	0.0175439	0.00813008	0.0181818	0.00340136	0.0173913	0.012939	0.0285714	0.0350877	0.0569106	0.0181818
[agct]{0,1}gtgt	0	0	0.00554529	0.00714286	0	0.0243902	0	0	0	0.00739372	0.00714286	0	0.00813008	0
[agct]{0,1}tgcg	0	0	0	0	0	0	0	0.00340136	0.00869565	0.00184843	0.00714286	0.0175439	0	0
tg[agct]{0,1}tt	0	0	0.00739372	0.0142857	0	0.0162602	0.0181818	0	0	0.00369686	0	0	0	0
[agct]{0,1}tgcc	0.00680272	0.00869565	0	0	0	0	0	0.00680272	0.00869565	0.00924214	0	0	0.00813008	0.0181818
[agct]{0,1}gtgg	0.00680272	0.00869565	0.00554529	0.00714286	0.0175439	0	0.0181818	0.00680272	0.00869565	0.00369686	0	0	0.0243902	0
cg[agct]{0,1}gt	0.00340136	0.00434783	0.00369686	0	0	0.00813008	0	0	0.00434783	0.00369686	0.00714286	0	0.00813008	0.0181818
[agct]{0,1}tgca	0	0	0.00739372	0	0	0	0	0	0.0130435	0.00739372	0	0	0	0
[agct]{0,1}gtgc	0.00340136	0.00434783	0.00554529	0	0	0	0.0181818	0.00680272	0.00434783	0.0110906	0	0	0	0
[agct]{0,1}gaat	0.00340136	0.00434783	0.00369686	0	0	0	0	0	0	0.00184843	0	0	0	0
[agct]{0,1}gtga	0.00340136	0.00434783	0.00184843	0.00714286	0	0	0	0.00680272	0.00434783	0.00739372	0.00714286	0	0	0
tt[agct]{0,1}tt	0	0	0.0203327	0	0	0.00813008	0	0	0	0.0110906	0	0	0.00813008	0
ct[agct]{0,1}gt	0.00340136	0.00434783	0.00369686	0	0.0175439	0	0	0	0	0.00184843	0	0	0	0
ta[agct]{0,1}gt	0	0	0.00739372	0	0	0	0	0	0.00434783	0.00554529	0	0	0	0.0181818
tg[agct]{0,1}tg	0.00340136	0.00434783	0.00184843	0	0	0.00813008	0	0	0.00434783	0.00369686	0	0	0	0
cg[agct]{0,1}gg	0.0204082	0.026087	0.00184843	0.0428571	0	0	0.0181818	0.0170068	0.00434783	0	0.00714286	0	0.00813008	0
tg[agct]{0,1}tc	0.00340136	0.00434783	0.00739372	0.00714286	0	0.00813008	0	0	0.00869565	0.00184843	0.0142857	0	0	0
cg[agct]{0,1}gc	0.0136054	0.0173913	0	0.00714286	0	0	0	0.0170068	0.00434783	0.00184843	0.00714286	0	0	0
tg[agct]{0,1}ta	0	0	0.00369686	0	0.0175439	0.00813008	0	0	0	0.00924214	0	0	0	0
[agct]{0,1}gaag	0.0102041	0.0130435	0.00369686	0.00714286	0.0175439	0.00813008	0	0.00340136	0	0.00554529	0	0.0175439	0.00813008	0
cg[agct]{0,1}ga	0.00340136	0.00434783	0	0.00714286	0	0	0	0	0	0.00369686	0.00714286	0	0	0
[agct]{0,1}gaac	0.0102041	0.0130435	0.00369686	0.00714286	0	0	0	0.00340136	0.00869565	0.00554529	0.00714286	0	0	0
tt[agct]{0,1}tg	0	0	0.00554529	0	0	0.0162602	0	0.00680272	0	0.00369686	0	0	0	0
[agct]{0,1}gaaa	0	0	0.00924214	0	0	0.00813008	0.0181818	0	0.0173913	0.00924214	0.0142857	0	0	0.0181818
ct[agct]{0,1}gg	0	0	0.00369686	0	0	0	0	0.0170068	0	0	0.00714286	0	0.00813008	0
ta[agct]{0,1}gg	0	0	0.00369686	0	0.0175439	0	0	0.00680272	0	0.00184843	0	0	0.00813008	0
gggt[agct]{0,1}	0.0136054	0.0173913	0.00739372	0.00714286	0	0	0	0.00340136	0.00434783	0.00554529	0.00714286	0	0	0
gg[agct]{0,3}	0.132653	0.169565	0.0591497	0.178571	0.175439	0.0650407	0.0909091	0.159864	0.0869565	0.0406654	0.0571429	0.0526316	0.0650407	0.0181818
tt[agct]{0,1}tc	0	0	0.0110906	0	0	0	0	0	0	0.00554529	0	0	0	0.0181818
ct[agct]{0,1}gc	0.00680272	0.00869565	0.00554529	0	0	0	0.0181818	0.00340136	0.00869565	0.00554529	0	0	0	0
ta[agct]{0,1}gc	0	0	0.00184843	0	0.0175439	0.00813008	0	0	0.00434783	0.00369686	0	0	0.00813008	0.0181818
gttt[agct]{0,1}	0	0	0.00739372	0.0285714	0	0.0162602	0	0	0.00434783	0.00184843	0	0	0.0162602	0
tt[agct]{0,1}ta	0.00340136	0.00434783	0.00184843	0	0	0.00813008	0	0.00340136	0	0.00554529	0	0	0	0.0363636
tcgt[agct]{0,1}	0	0	0.00369686	0	0	0	0	0	0	0.00184843	0	0	0	0
ct[agct]{0,1}ga	0.00680272	0.00869565	0	0	0	0	0	0.00340136	0	0.00369686	0	0	0	0
ta[agct]{0,1}ga	0	0	0.00369686	0	0	0	0.0181818	0	0	0.00184843	0	0	0	0
acaa[agct]{0,1}	0.00340136	0.00434783	0.00369686	0	0	0	0	0.00340136	0.00434783	0.00369686	0	0	0.0243902	0
gtgt[agct]{0,1}	0	0	0.00554529	0.00714286	0	0.0243902	0	0	0	0.00739372	0.00714286	0	0.00813008	0
ctt[agct]{0,2}	0.00680272	0.00869565	0.0184843	0	0.0175439	0.0325203	0.0363636	0.0102041	0.0173913	0.025878	0.00714286	0.0175439	0.0243902	0.0181818
accg[agct]{0,1}	0.0102041	0.0130435	0.00184843	0	0	0	0	0	0	0.00184843	0.00714286	0	0	0.0181818
[agct]{0,1}aatt	0	0	0.00369686	0	0	0	0	0	0.00434783	0.00369686	0	0	0	0
[agct]{0,1}tgat	0.00340136	0.00434783	0.00184843	0.00714286	0	0	0	0	0.00434783	0.00369686	0.00714286	0	0	0
cgt[agct]{0,2}	0.00680272	0.00869565	0.00924214	0.0285714	0	0.0162602	0	0.0102041	0.0130435	0.00924214	0.0142857	0.0175439	0.0162602	0.0181818
ccta[agct]{0,1}	0.00680272	0.00869565	0.00369686	0	0	0	0	0	0	0.00369686	0	0.0175439	0.00813008	0.0181818
c[agct]{0,1}gct	0.00680272	0.00869565	0.00554529	0.00714286	0	0	0	0.0136054	0.00434783	0.00369686	0.00714286	0	0	0
ggag[agct]{0,1}	0.0102041	0.0130435	0.00184843	0.00714286	0.0175439	0.00813008	0	0.0170068	0.00434783	0.00184843	0.00714286	0	0.00813008	0
atca[agct]{0,1}	0	0	0.00369686	0.00714286	0	0	0	0.00340136	0	0.00184843	0.00714286	0	0	0
[agct]{0,1}tgag	0.00340136	0.00434783	0.00739372	0.00714286	0	0	0	0.00340136	0	0.00739372	0.0142857	0	0	0
[agct]{0,1}aatg	0.00340136	0.00434783	0.00739372	0	0	0	0.0181818	0	0.00434783	0.00184843	0	0	0.00813008	0
tcag[agct]{0,1}	0	0	0.00184843	0.0285714	0.0175439	0	0	0.00680272	0.00869565	0.00369686	0.00714286	0	0	0
[agct]{0,1}aatc	0	0	0	0	0	0	0	0	0	0.00554529	0	0	0.00813008	0.0181818
[agct]{0,1}tgac	0	0	0.00369686	0.00714286	0	0	0	0	0	0.00554529	0.00714286	0	0	0
[agct]{0,1}aata	0	0	0.00369686	0	0	0	0	0	0	0.00184843	0	0.0175439	0.0162602	0
c[agct]{0,1}gcg	0.0136054	0.0173913	0	0.0214286	0	0	0	0.0136054	0	0	0.0142857	0.0175439	0	0.0181818
[agct]{0,1}tgaa	0.00340136	0.00434783	0.00554529	0	0	0.00813008	0	0.00340136	0	0.00739372	0.00714286	0.0175439	0	0
gtag[agct]{0,1}	0.00340136	0.00434783	0.00184843	0	0	0	0	0	0	0.00554529	0	0	0	0
c[agct]{0,1}gcc	0.0306122	0.0391304	0.00369686	0.00714286	0	0	0	0.0102041	0.0130435	0.00554529	0.0285714	0.0350877	0.00813008	0.0181818
a[agct]{0,2}gt	0.0102041	0.0130435	0.0203327	0.0142857	0.0175439	0.00813008	0.0181818	0.00680272	0.00434783	0.0166359	0	0	0.0243902	0
c[agct]{0,1}gca	0.00680272	0.00869565	0.00369686	0.00714286	0.0175439	0	0	0	0.00434783	0.00184843	0	0	0	0
cag[agct]{0,2}	0.0204082	0.026087	0.0221811	0.0428571	0.0175439	0.00813008	0.0363636	0.0204082	0.0391304	0.0184843	0.00714286	0.0175439	0	0.0181818
t[agct]{0,1}act	0	0	0.00369686	0	0	0	0	0	0	0.00369686	0.00714286	0	0	0.0181818
a[agct]{0,2}gg	0.0170068	0.0217391	0.0184843	0.0214286	0.0701754	0.0162602	0.0181818	0.0238095	0.00869565	0.012939	0.00714286	0.0175439	0	0.0181818
a[agct]{0,2}gc	0.0170068	0.0217391	0.0147874	0.0142857	0.0175439	0	0.0181818	0.00680272	0.0304348	0.00739372	0.0142857	0	0.0162602	0.0181818
a[agct]{0,2}ga	0.0102041	0.0130435	0.0166359	0.0214286	0	0.00813008	0.0181818	0.00680272	0.026087	0.0166359	0.0285714	0.0175439	0	0
t[agct]{0,1}acg	0	0	0	0.0142857	0	0	0	0	0	0.00369686	0.00714286	0	0	0
t[agct]{0,1}acc	0.00340136	0.00434783	0.00369686	0	0	0	0	0	0	0.00184843	0	0	0	0
t[agct]{0,1}aca	0.00340136	0.00434783	0.00739372	0.00714286	0	0	0	0.00340136	0	0.00369686	0	0	0.00813008	0
[agct]{0,1}gtct	0.0102041	0.0130435	0.00554529	0	0	0	0	0.00340136	0.00434783	0	0	0	0	0
c[agct]{0,1}gat	0	0	0.00184843	0	0	0	0	0.00340136	0	0.00184843	0	0	0	0
acc[agct]{0,1}t	0.00340136	0.00434783	0.00184843	0	0	0	0	0.00340136	0	0.00554529	0	0	0	0
[agct]{0,3}tt	0.0170068	0.0217391	0.0924214	0.0714286	0.0350877	0.154472	0.0909091	0.0272109	0.0434783	0.0831793	0.0142857	0.0350877	0.0650407	0.109091
t[agct]{0,1}tgt	0	0	0.00554529	0	0	0.0325203	0	0.00340136	0.00434783	0.00554529	0	0	0	0
[agct]{0,1}gtcg	0	0	0.00184843	0	0	0	0	0.00340136	0	0	0	0	0	0
cg[agct]{0,1}ct	0.00680272	0.00869565	0.00184843	0	0	0	0	0.0102041	0.00434783	0.00369686	0.00714286	0.0175439	0	0
c[agct]{0,1}gag	0.00680272	0.00869565	0.00184843	0.0142857	0.0175439	0.00813008	0	0.0102041	0.0130435	0.00554529	0.0214286	0	0.00813008	0
[agct]{0,1}gtcc	0.0102041	0.0130435	0.00184843	0	0	0.00813008	0	0	0	0.00369686	0	0	0	0.0363636
acc[agct]{0,1}g	0	0	0.00184843	0.00714286	0	0	0	0.00340136	0	0	0	0.0175439	0	0
gga[agct]{0,1}t	0.00340136	0.00434783	0.00554529	0	0	0.0162602	0.0363636	0.00680272	0	0	0	0	0	0
[agct]{0,1}gtca	0	0	0.00554529	0.00714286	0	0	0	0	0.00869565	0.00369686	0.00714286	0	0	0
c[agct]{0,1}gac	0	0	0.00184843	0	0	0	0	0.00680272	0.00869565	0.00554529	0.00714286	0	0	0
[agct]{0,3}tg	0.047619	0.0608696	0.0720887	0.0357143	0.0526316	0.097561	0.0727273	0.047619	0.0652174	0.0850277	0.0571429	0.0350877	0.0650407	0.0363636
c[agct]{0,1}gaa	0.00680272	0.00869565	0.00369686	0	0.0175439	0	0	0	0.00434783	0.00369686	0.0214286	0.0175439	0	0
acc[agct]{0,1}c	0.0102041	0.0130435	0.00554529	0	0	0	0	0	0	0.00369686	0.0142857	0	0	0.0181818
t[agct]{0,1}tgg	0.00340136	0.00434783	0.00554529	0	0	0.0162602	0	0	0.00434783	0	0	0	0.0243902	0
tca[agct]{0,1}t	0	0	0.00554529	0.0142857	0	0	0	0.00340136	0	0.00554529	0	0	0	0
acc[agct]{0,1}a	0	0	0.00369686	0	0	0	0	0.0102041	0.00434783	0.00554529	0.00714286	0	0.00813008	0
[agct]{0,3}tc	0.0544218	0.0695652	0.0573013	0.0642857	0.0350877	0.0325203	0.0181818	0.0510204	0.0434783	0.0480591	0.0714286	0.0877193	0.0487805	0.0727273
ct[agct]{0,1}ct	0	0	0.00924214	0	0	0	0	0.00680272	0	0.00369686	0	0	0	0
ta[agct]{0,1}ct	0	0	0	0	0	0	0	0	0	0.00369686	0	0	0	0.0181818
t[agct]{0,1}tgc	0	0	0.00369686	0	0	0	0	0.00340136	0.0130435	0.00924214	0	0	0	0
aact[agct]{0,1}	0.00680272	0.00869565	0.00369686	0	0	0.0162602	0	0.00340136	0	0.00739372	0	0	0.00813008	0.0181818
[agct]{0,3}ta	0.0102041	0.0130435	0.0554529	0.00714286	0.0526316	0.0406504	0.0545455	0.0102041	0.00869565	0.0554529	0.00714286	0.0526316	0.0406504	0.0545455
cg[agct]{0,1}cg	0.0102041	0.0130435	0	0	0.0175439	0	0	0.0102041	0	0	0	0.0175439	0	0
t[agct]{0,1}aat	0	0	0.00184843	0	0	0	0	0	0	0.00554529	0	0	0	0
t[agct]{0,1}tga	0.00340136	0.00434783	0.00739372	0	0	0.00813008	0	0.00340136	0.00434783	0.00739372	0	0.0175439	0	0
gta[agct]{0,1}t	0	0	0.00184843	0	0.0175439	0.00813008	0	0	0	0.00369686	0	0	0	0
gc[agct]{0,2}t	0.00680272	0.00869565	0.00739372	0.0142857	0	0.0162602	0.0181818	0.0170068	0.0173913	0.0147874	0.0142857	0.0175439	0	0.0181818
cg[agct]{0,1}cc	0.0272109	0.0347826	0.00184843	0.00714286	0	0.00813008	0	0.0102041	0.00434783	0.00184843	0.0214286	0	0	0.0181818
gga[agct]{0,1}g	0.0102041	0.0130435	0.00554529	0.00714286	0.0175439	0	0.0181818	0	0.0130435	0.00184843	0	0	0.0162602	0
cg[agct]{0,1}ca	0.00340136	0.00434783	0.00369686	0	0	0	0	0.00340136	0.0130435	0	0.00714286	0	0	0
gga[agct]{0,1}c	0.00340136	0.00434783	0.00184843	0.00714286	0.0175439	0	0	0.0204082	0.00434783	0.00369686	0.00714286	0.0175439	0	0
tca[agct]{0,1}g	0	0	0.00554529	0.0142857	0	0	0	0.00340136	0.00869565	0.00184843	0.00714286	0	0	0
gga[agct]{0,1}a	0	0	0.00554529	0	0.0175439	0	0	0.00340136	0	0.00184843	0	0	0.00813008	0.0181818
ct[agct]{0,1}cg	0.0136054	0.0173913	0.00184843	0.00714286	0	0.00813008	0	0.00680272	0	0.00184843	0.00714286	0	0.00813008	0
ta[agct]{0,1}cg	0.00340136	0.00434783	0	0	0	0	0	0	0	0.00369686	0	0	0	0
tca[agct]{0,1}c	0.00340136	0.00434783	0.00554529	0.00714286	0	0	0	0	0.00434783	0.00369686	0.0142857	0	0	0
t[agct]{0,1}aag	0	0	0.00739372	0.00714286	0	0.00813008	0	0	0	0.00369686	0	0.0175439	0.0162602	0.0181818
gta[agct]{0,1}g	0	0	0.00554529	0	0.0175439	0	0	0	0.00434783	0.00554529	0	0	0	0
ct[agct]{0,1}cc	0.00680272	0.00869565	0	0	0	0.00813008	0	0.0102041	0.0130435	0.00739372	0.00714286	0.0350877	0.00813008	0.0181818
tca[agct]{0,1}a	0.00340136	0.00434783	0.00739372	0	0.0175439	0	0	0.00340136	0	0.00739372	0	0	0.00813008	0
ta[agct]{0,1}cc	0.00340136	0.00434783	0.00184843	0	0	0	0	0	0	0.00184843	0	0	0	0
gc[agct]{0,2}g	0.0442177	0.0565217	0.012939	0.0357143	0.0350877	0.00813008	0.0181818	0.0442177	0.0347826	0.00739372	0.0285714	0	0.0162602	0.0181818
ct[agct]{0,1}ca	0.00340136	0.00434783	0.00554529	0	0.0175439	0	0	0.00340136	0.00434783	0	0.00714286	0	0.00813008	0
ta[agct]{0,1}ca	0	0	0.00924214	0	0	0	0	0	0	0.00369686	0	0.0175439	0.00813008	0
t[agct]{0,1}aac	0.00340136	0.00434783	0.00554529	0	0	0.00813008	0	0.00340136	0	0.00739372	0.0142857	0	0	0
gta[agct]{0,1}c	0.00340136	0.00434783	0	0	0	0	0	0	0	0.00554529	0	0.0175439	0	0
t[agct]{0,1}aaa	0	0	0.0110906	0	0	0.00813008	0.0363636	0	0	0.00739372	0.00714286	0	0.00813008	0
gc[agct]{0,2}c	0.0408163	0.0521739	0.0166359	0.0214286	0.0175439	0.00813008	0	0.047619	0.0217391	0.0166359	0.0285714	0.0350877	0.0162602	0.0363636
gta[agct]{0,1}a	0	0	0.00369686	0	0	0	0	0	0	0.00184843	0.00714286	0	0.00813008	0
gc[agct]{0,2}a	0.0238095	0.0304348	0.0147874	0.0214286	0.0175439	0.0162602	0.0181818	0.00680272	0.0304348	0.012939	0.0214286	0.0175439	0.0162602	0
aat[agct]{0,2}	0	0	0.0147874	0	0	0	0.0181818	0	0.00869565	0.012939	0	0.0175439	0.0325203	0.0181818
[agct]{0,1}gtat	0	0	0.00184843	0	0.0175439	0	0	0	0	0.00554529	0	0	0	0
ga[agct]{0,1}tt	0	0	0.00554529	0	0	0.00813008	0.0363636	0.00340136	0	0	0	0	0	0
caaa[agct]{0,1}	0	0	0.00184843	0	0	0	0	0	0.00869565	0.00739372	0	0	0.0406504	0
[agct]{0,1}gtag	0.00340136	0.00434783	0.00184843	0	0	0	0	0	0	0.00554529	0	0	0	0
cg[agct]{0,1}at	0	0	0.00184843	0	0.0175439	0	0	0.00340136	0	0	0	0	0	0
cacg[agct]{0,1}	0.00680272	0.00869565	0.00554529	0.00714286	0	0.0162602	0	0.00340136	0.00869565	0.00369686	0.0142857	0	0.00813008	0
[agct]{0,1}gtac	0	0	0.00369686	0	0.0175439	0.00813008	0	0	0	0.00369686	0	0.0175439	0.00813008	0
acta[agct]{0,1}	0	0	0.00369686	0	0	0	0	0	0	0.00184843	0	0	0	0
[agct]{0,1}gtaa	0	0	0.00369686	0	0	0	0	0	0.00434783	0.00184843	0.00714286	0	0	0
ga[agct]{0,1}tg	0.0102041	0.0130435	0.00369686	0	0.0175439	0.00813008	0	0.00680272	0	0.00184843	0.00714286	0	0	0
a[agct]{0,2}ct	0.0102041	0.0130435	0.0110906	0	0	0.0243902	0	0.0136054	0.0130435	0.0110906	0.0142857	0.0175439	0.0162602	0
ga[agct]{0,1}tc	0.00340136	0.00434783	0	0	0	0	0	0.00340136	0	0	0	0	0	0
[agct]{0,1}gggt	0.0136054	0.0173913	0.00739372	0.00714286	0	0	0	0.00340136	0.00434783	0.00554529	0.00714286	0	0	0
acga[agct]{0,1}	0	0	0.00184843	0	0	0	0	0	0.00434783	0.00369686	0	0	0	0
ga[agct]{0,1}ta	0	0	0.00554529	0	0	0	0	0	0.00434783	0.00554529	0	0	0	0
ct[agct]{0,1}at	0	0	0.00369686	0	0	0	0	0	0	0.00554529	0	0.0175439	0	0
a[agct]{0,1}att	0	0	0	0	0	0.0162602	0	0	0.00434783	0.00739372	0	0	0	0
ta[agct]{0,1}at	0	0	0.00369686	0	0	0	0	0	0	0.00924214	0	0.0175439	0	0
gcca[agct]{0,1}	0.00680272	0.00869565	0.00184843	0	0	0.0162602	0	0.00680272	0.00434783	0.00554529	0	0.0175439	0.00813008	0.0363636
cg[agct]{0,1}ag	0.00680272	0.00869565	0.00184843	0.00714286	0	0.00813008	0	0.0136054	0	0.00184843	0.00714286	0	0.00813008	0
cg[agct]{0,1}ac	0.00340136	0.00434783	0	0	0	0	0	0.00340136	0.00869565	0.00184843	0.00714286	0.0175439	0	0
cg[agct]{0,1}aa	0	0	0	0	0.0175439	0	0	0	0.00434783	0.00184843	0.00714286	0	0	0
a[agct]{0,2}cg	0.0170068	0.0217391	0.00924214	0.0142857	0.0175439	0.00813008	0.0181818	0.0102041	0.00869565	0.0110906	0.0142857	0.0175439	0.00813008	0
[agct]{0,1}gggg	0.0170068	0.0217391	0.00184843	0.05	0.0350877	0	0	0.0102041	0.00869565	0.00554529	0	0	0	0
a[agct]{0,2}cc	0.0170068	0.0217391	0.00924214	0.0142857	0.0350877	0.0162602	0	0.0136054	0.00869565	0.012939	0.0428571	0.0175439	0.0325203	0.0363636
a[agct]{0,1}atg	0	0	0.00739372	0	0	0	0.0181818	0	0.00434783	0.00184843	0	0.0175439	0.00813008	0
ct[agct]{0,1}ag	0.00340136	0.00434783	0.00739372	0.0214286	0	0	0.0181818	0.00340136	0.00434783	0.00739372	0.0214286	0	0	0.0181818
ta[agct]{0,1}ag	0	0	0.00554529	0	0	0	0	0	0	0.00184843	0	0	0.00813008	0
a[agct]{0,2}ca	0.00340136	0.00434783	0.0166359	0.00714286	0	0.0162602	0	0.0136054	0.026087	0.0240296	0.0142857	0.0350877	0.0325203	0.0363636
[agct]{0,1}attt	0	0	0.00924214	0	0	0.0162602	0.0181818	0	0.00434783	0.00554529	0	0	0	0.0181818
[agct]{0,1}gggc	0.0170068	0.0217391	0.00184843	0.0285714	0	0	0	0.0306122	0.00869565	0.00184843	0.00714286	0	0.00813008	0
a[agct]{0,1}atc	0	0	0	0	0	0	0	0	0.00434783	0.00369686	0	0	0	0.0181818
ct[agct]{0,1}ac	0.00340136	0.00434783	0.00369686	0	0	0	0	0	0	0.00184843	0.00714286	0	0	0.0181818
[agct]{0,1}ggga	0.0102041	0.0130435	0.00184843	0.0142857	0.0350877	0.00813008	0	0.00340136	0	0.00184843	0	0.0175439	0.00813008	0
ta[agct]{0,1}ac	0	0	0.00184843	0.00714286	0	0.00813008	0	0	0	0.00184843	0.00714286	0	0	0
tgtc[agct]{0,1}	0.00340136	0.00434783	0.00554529	0	0	0	0	0	0	0.00369686	0	0	0	0
a[agct]{0,1}ata	0	0	0.00739372	0	0	0	0	0	0	0.00369686	0	0	0.0162602	0
ct[agct]{0,1}aa	0.00340136	0.00434783	0.00369686	0	0	0.00813008	0.0181818	0	0	0.00554529	0.00714286	0.0175439	0.00813008	0
ta[agct]{0,1}aa	0.00340136	0.00434783	0.00554529	0	0	0	0.0363636	0.00340136	0	0.00184843	0	0	0.00813008	0
[agct]{0,1}attg	0	0	0	0	0	0.0162602	0	0	0	0.00554529	0	0	0	0
tttc[agct]{0,1}	0	0	0.00924214	0.0142857	0	0	0.0181818	0	0.00434783	0.00924214	0	0	0.00813008	0.0181818
gtgg[agct]{0,1}	0.00680272	0.00869565	0.00554529	0.00714286	0.0175439	0	0.0181818	0.00680272	0.00869565	0.00369686	0	0	0.0243902	0
[agct]{0,1}attc	0	0	0.00184843	0	0	0	0	0.00340136	0	0.00369686	0	0	0	0
[agct]{0,1}tctt	0.00340136	0.00434783	0.00739372	0	0	0	0	0.00340136	0	0.00184843	0.00714286	0	0.0162602	0
[agct]{0,1}atta	0	0	0.00184843	0	0.0175439	0	0	0	0	0	0	0	0	0
ctg[agct]{0,2}	0.0204082	0.026087	0.0184843	0.00714286	0.0175439	0	0.0181818	0.0204082	0.0173913	0.0221811	0.0428571	0.0175439	0.00813008	0.0181818
ccac[agct]{0,1}	0.00680272	0.00869565	0.00369686	0	0	0.0243902	0	0.00680272	0.00434783	0.00554529	0.00714286	0.0175439	0	0.0181818
cgg[agct]{0,2}	0.0408163	0.0521739	0.00369686	0.0428571	0.0175439	0.00813008	0.0181818	0.0680272	0.0130435	0.00739372	0.0357143	0.0175439	0.00813008	0
gaac[agct]{0,1}	0.0102041	0.0130435	0.00369686	0.00714286	0	0	0	0.00340136	0.00869565	0.00554529	0.00714286	0	0	0
[agct]{0,1}tctg	0.00340136	0.00434783	0.00924214	0	0	0	0	0.00340136	0.00434783	0.00184843	0	0.0175439	0	0
t[agct]{0,1}tct	0.00340136	0.00434783	0.0110906	0	0	0	0	0	0	0.00369686	0.0142857	0	0.00813008	0.0181818
[agct]{0,1}tctc	0.00340136	0.00434783	0.00369686	0	0	0.00813008	0	0	0	0	0.0142857	0.0175439	0	0
[agct]{0,1}tcta	0	0	0	0	0	0	0	0.00340136	0	0.00184843	0	0	0	0.0181818
tacc[agct]{0,1}	0	0	0.00369686	0	0	0	0	0	0	0.00184843	0	0.0175439	0	0
a[agct]{0,2}at	0	0	0.0184843	0	0	0	0.0181818	0	0.00869565	0.0110906	0	0	0.0162602	0
t[agct]{0,1}tcg	0	0	0.00184843	0.00714286	0	0	0	0	0	0.00184843	0	0	0	0
t[agct]{0,1}tcc	0.00340136	0.00434783	0.00184843	0	0	0.00813008	0.0181818	0	0.00434783	0.00554529	0	0.0175439	0	0
t[agct]{0,1}tca	0	0	0.00554529	0.00714286	0	0	0	0	0	0.00554529	0	0	0	0
a[agct]{0,2}ag	0.00680272	0.00869565	0.0147874	0.0142857	0.0175439	0.00813008	0.0181818	0.00340136	0.0173913	0.0240296	0	0.0175439	0	0
acc[agct]{0,2}	0.0136054	0.0173913	0.012939	0.00714286	0	0	0	0.0170068	0.00434783	0.0147874	0.0214286	0.0175439	0.00813008	0.0181818
a[agct]{0,2}ac	0.0102041	0.0130435	0.0184843	0.00714286	0	0	0.0363636	0.0136054	0.00434783	0.00924214	0.0142857	0.0175439	0.0406504	0.0181818
a[agct]{0,2}aa	0	0	0.025878	0	0	0.0162602	0.0181818	0.00340136	0.0391304	0.0406654	0.00714286	0	0.0406504	0.0181818
ggt[agct]{0,1}t	0.00340136	0.00434783	0.00554529	0.0142857	0	0	0	0	0.00434783	0.00369686	0.00714286	0	0	0
agtg[agct]{0,1}	0.00340136	0.00434783	0.00739372	0.00714286	0.0175439	0	0.0181818	0	0	0.00184843	0	0	0	0
ggg[agct]{0,1}t	0.00680272	0.00869565	0.00184843	0.0214286	0.0175439	0.00813008	0	0.00340136	0.00434783	0.00554529	0.00714286	0.0175439	0	0
gc[agct]{0,1}gt	0.00340136	0.00434783	0.00184843	0	0	0	0.0181818	0.0136054	0.00434783	0.00369686	0.00714286	0	0	0
gtt[agct]{0,1}t	0	0	0.00184843	0	0	0.00813008	0	0.00680272	0	0.00184843	0	0	0	0
c[agct]{0,1}ctt	0	0	0.00369686	0	0.0175439	0	0	0.00340136	0.00434783	0.00924214	0.00714286	0.0175439	0.00813008	0
tcg[agct]{0,1}t	0	0	0.00369686	0.00714286	0	0	0	0	0	0.00184843	0	0	0	0
ggt[agct]{0,1}g	0.00680272	0.00869565	0.00184843	0	0	0.00813008	0.0181818	0.00680272	0.00434783	0.00369686	0	0	0	0
ggt[agct]{0,1}c	0.00680272	0.00869565	0.00554529	0.00714286	0.0175439	0	0	0.00340136	0.00434783	0.00184843	0	0	0	0
gtg[agct]{0,1}t	0.00340136	0.00434783	0.00369686	0.0142857	0	0.0243902	0.0181818	0	0.00434783	0.00924214	0.00714286	0	0	0
ggt[agct]{0,1}a	0	0	0.00184843	0	0	0	0	0.00340136	0	0.00369686	0	0	0	0
ggg[agct]{0,1}g	0.00680272	0.00869565	0.00184843	0.0357143	0.0175439	0	0	0.0238095	0.0130435	0.00369686	0.00714286	0	0	0
t[agct]{0,1}tat	0	0	0.00369686	0	0.0175439	0	0	0	0	0.00739372	0	0	0	0
tgca[agct]{0,1}	0	0	0.00739372	0	0	0	0	0	0.0130435	0.00739372	0	0	0	0
gc[agct]{0,1}gg	0.0170068	0.0217391	0.00369686	0.0285714	0.0175439	0.00813008	0.0181818	0.0204082	0.00869565	0.00184843	0.0142857	0	0	0
gtt[agct]{0,1}g	0.00680272	0.00869565	0.00554529	0.00714286	0	0.0162602	0.0181818	0.00680272	0.00434783	0	0	0	0	0
ggg[agct]{0,1}c	0.0340136	0.0434783	0.00554529	0.0285714	0	0	0	0.0170068	0.00434783	0.00369686	0	0	0.00813008	0
tcg[agct]{0,1}g	0	0	0	0	0	0	0	0.00340136	0.00434783	0.00369686	0	0	0	0
c[agct]{0,1}ctg	0.00340136	0.00434783	0.00369686	0	0	0	0	0	0	0.00554529	0.0214286	0.0175439	0	0.0181818
ggg[agct]{0,1}a	0.0102041	0.0130435	0.00369686	0.0142857	0.0350877	0	0	0.00340136	0	0.00184843	0	0	0.00813008	0
gc[agct]{0,1}gc	0.0170068	0.0217391	0.00369686	0.00714286	0.0175439	0	0	0.0170068	0.00434783	0.00369686	0.00714286	0.0175439	0	0
gtt[agct]{0,1}c	0	0	0.00739372	0.0214286	0	0.00813008	0	0	0	0.00369686	0.00714286	0	0.00813008	0
c[agct]{0,1}ctc	0.00680272	0.00869565	0.00184843	0.00714286	0	0.00813008	0	0.0136054	0.00434783	0	0.0357143	0.0175439	0	0
gc[agct]{0,1}ga	0	0	0.00184843	0.0142857	0.0175439	0	0	0.00680272	0.00869565	0.00369686	0.0142857	0	0	0
tcg[agct]{0,1}c	0.00340136	0.00434783	0.00184843	0.00714286	0	0	0	0.00340136	0	0.00184843	0.00714286	0	0	0
gtt[agct]{0,1}a	0.00340136	0.00434783	0.00739372	0.0142857	0	0	0	0.00340136	0	0.00554529	0	0	0.00813008	0
c[agct]{0,1}cta	0.00680272	0.00869565	0	0	0	0	0	0.00340136	0	0.00184843	0	0.0175439	0	0
gtg[agct]{0,1}g	0.00340136	0.00434783	0.00184843	0	0	0	0	0.0102041	0.00869565	0.00739372	0	0	0.0243902	0
tcg[agct]{0,1}a	0.00340136	0.00434783	0	0	0	0	0	0.00680272	0	0	0	0	0	0
ttca[agct]{0,1}	0.00340136	0.00434783	0.00739372	0.00714286	0.0175439	0	0	0.00340136	0	0.00554529	0	0	0.00813008	0
t[agct]{0,1}tag	0.00340136	0.00434783	0.00184843	0	0	0.00813008	0	0.00340136	0	0.00369686	0	0	0	0
gtg[agct]{0,1}c	0.00680272	0.00869565	0.00184843	0.00714286	0.0175439	0	0.0181818	0.00680272	0	0.00369686	0	0	0.00813008	0
[agct]{0,1}ggct	0.00340136	0.00434783	0	0.00714286	0.0175439	0.00813008	0	0.0102041	0.00434783	0	0.00714286	0	0.00813008	0
aaaa[agct]{0,1}	0	0	0.0147874	0	0	0	0.0363636	0	0.00434783	0.0184843	0	0	0	0
gtg[agct]{0,1}a	0	0	0.0110906	0	0	0	0	0.00340136	0.00434783	0.00924214	0.00714286	0	0	0
t[agct]{0,1}tac	0	0	0.00184843	0.00714286	0	0.00813008	0	0	0	0.00369686	0	0	0	0
t[agct]{0,1}taa	0	0	0.00739372	0	0	0	0	0	0	0.00184843	0.00714286	0	0.00813008	0.0363636
aacg[agct]{0,1}	0.00340136	0.00434783	0	0	0	0	0	0.00340136	0.00434783	0.00369686	0.0142857	0	0	0
t[agct]{0,1}ggt	0.0102041	0.0130435	0.00554529	0.00714286	0	0.00813008	0	0	0.00434783	0.00369686	0	0	0	0
[agct]{0,1}ggcg	0.00680272	0.00869565	0.00184843	0.0142857	0.0175439	0	0	0.0272109	0.00434783	0.00369686	0	0.0175439	0	0
agt[agct]{0,2}	0.0136054	0.0173913	0.0240296	0.0142857	0.0175439	0.00813008	0.0363636	0.0136054	0.00869565	0.0147874	0	0	0.0243902	0.0181818
cata[agct]{0,1}	0	0	0.00369686	0	0	0.00813008	0	0	0	0.00369686	0	0	0	0
[agct]{0,1}ggcc	0.0238095	0.0304348	0.00184843	0.0214286	0	0.0162602	0	0.0238095	0.0173913	0.00184843	0.0214286	0	0.0162602	0
[agct]{0,1}ggca	0.00680272	0.00869565	0.00924214	0	0	0.00813008	0.0181818	0.00680272	0.00869565	0	0	0	0	0
t[agct]{0,1}ggg	0.00340136	0.00434783	0.00184843	0	0.0175439	0.00813008	0	0.00680272	0.00434783	0.00369686	0	0	0	0
caga[agct]{0,1}	0.00340136	0.00434783	0.00184843	0	0.0175439	0	0	0.00340136	0.0130435	0.00924214	0	0	0	0
t[agct]{0,1}ggc	0	0	0.00184843	0.00714286	0	0.0162602	0	0.0170068	0.00434783	0.00184843	0.00714286	0	0.00813008	0
t[agct]{0,1}gga	0.00340136	0.00434783	0.00184843	0	0	0.00813008	0.0181818	0.00340136	0	0	0	0	0.0162602	0
aag[agct]{0,2}	0.0102041	0.0130435	0.025878	0.00714286	0.0350877	0.0243902	0.0181818	0.00680272	0.026087	0.0184843	0	0.0175439	0.0325203	0.0363636
[agct]{0,1}ccgt	0.00340136	0.00434783	0.00184843	0.00714286	0	0	0	0.00680272	0	0.00184843	0	0	0	0
a[agct]{0,1}ttt	0	0	0.00739372	0	0	0.0243902	0	0	0.0130435	0.00739372	0	0	0.0162602	0.0363636
[agct]{0,1}ccgg	0.0272109	0.0347826	0	0.00714286	0	0.00813008	0	0.0272109	0.00434783	0	0.00714286	0	0.00813008	0
a[agct]{0,1}ttg	0	0	0.00924214	0	0	0.0162602	0	0.00340136	0	0.0110906	0	0	0	0
[agct]{0,1}ccgc	0.0340136	0.0434783	0.00184843	0.0142857	0.0175439	0	0	0.00680272	0	0	0.0214286	0.0175439	0	0.0181818
a[agct]{0,1}ttc	0.00340136	0.00434783	0.00554529	0	0	0.00813008	0.0181818	0.00340136	0.00434783	0.00184843	0	0	0	0
[agct]{0,1}ggat	0	0	0.00369686	0	0.0175439	0.00813008	0.0181818	0.00340136	0.00434783	0.00184843	0	0.0175439	0	0
[agct]{0,1}ccga	0.00340136	0.00434783	0.00369686	0.00714286	0	0	0	0	0.00869565	0.00184843	0.0142857	0	0	0
a[agct]{0,1}tta	0	0	0.00554529	0	0	0	0.0363636	0	0	0.00184843	0	0	0	0
cgct[agct]{0,1}	0.00680272	0.00869565	0	0.00714286	0	0	0	0.00680272	0.00434783	0.00184843	0.0142857	0	0	0
ccgc[agct]{0,1}	0.0340136	0.0434783	0.00184843	0.0142857	0.0175439	0	0	0.00680272	0	0	0.0214286	0.0175439	0	0.0181818
gatc[agct]{0,1}	0.00340136	0.00434783	0	0.00714286	0.0175439	0	0	0.00340136	0.00869565	0	0.00714286	0.0175439	0	0
[agct]{0,1}ggag	0.0102041	0.0130435	0.00184843	0.00714286	0.0175439	0.00813008	0	0.0170068	0.00434783	0.00184843	0.00714286	0	0.00813008	0
ctct[agct]{0,1}	0	0	0.00184843	0	0	0.00813008	0	0	0	0	0.0214286	0.0175439	0.00813008	0
[agct]{0,1}ggac	0	0	0.00369686	0	0	0	0.0363636	0.0102041	0.00434783	0.00184843	0	0	0.00813008	0
[agct]{0,1}ggaa	0.00680272	0.00869565	0.00924214	0.00714286	0.0175439	0	0	0	0.00434783	0.00184843	0	0	0.00813008	0.0181818
gagc[agct]{0,1}	0.00680272	0.00869565	0	0.00714286	0	0	0	0.0136054	0.00434783	0.00369686	0.0142857	0	0.00813008	0
aac[agct]{0,1}t	0	0	0.00554529	0	0	0.0162602	0	0	0	0.00554529	0	0	0	0.0181818
tg[agct]{0,1}gt	0.0102041	0.0130435	0.00554529	0	0	0.0162602	0	0.00340136	0.00434783	0.00739372	0	0	0	0
tt[agct]{0,1}gt	0.00340136	0.00434783	0.00184843	0	0	0.0243902	0	0	0	0.00184843	0	0	0	0
aac[agct]{0,1}g	0.0102041	0.0130435	0.00184843	0.00714286	0	0	0	0.00680272	0	0.00369686	0.0142857	0	0	0
tg[agct]{0,1}gg	0	0	0.00739372	0	0	0	0	0.00340136	0.00434783	0.00369686	0.0142857	0.0175439	0.0162602	0
gc[agct]{0,1}ct	0.00340136	0.00434783	0.00184843	0.00714286	0	0.00813008	0	0.00340136	0.00434783	0.00369686	0.00714286	0	0	0.0181818
aac[agct]{0,1}c	0.00680272	0.00869565	0.00184843	0	0	0	0	0.00340136	0.00434783	0.00554529	0.0214286	0	0.0325203	0
tg[agct]{0,1}gc	0	0	0	0.00714286	0	0	0	0.0170068	0	0.00924214	0.00714286	0	0.00813008	0
[agct]{0,1}agtt	0.00340136	0.00434783	0.00739372	0	0	0.00813008	0.0181818	0.00680272	0.00434783	0.00369686	0	0	0.0162602	0
aac[agct]{0,1}a	0	0	0.00184843	0	0	0	0	0	0.00869565	0.00554529	0.00714286	0	0.00813008	0
tg[agct]{0,1}ga	0.00340136	0.00434783	0	0	0	0.00813008	0	0.00340136	0.00869565	0.00554529	0	0	0.00813008	0
tt[agct]{0,1}gg	0.00340136	0.00434783	0	0.0142857	0.0175439	0.0325203	0.0181818	0	0.00434783	0.00184843	0	0	0	0
tt[agct]{0,1}gc	0	0	0.00739372	0	0	0.00813008	0	0.00680272	0.0173913	0	0	0	0	0
gc[agct]{0,1}cg	0.0170068	0.0217391	0.00184843	0.00714286	0	0	0	0.0136054	0.00434783	0	0.00714286	0	0	0
tt[agct]{0,1}ga	0.00680272	0.00869565	0.00369686	0	0	0.00813008	0.0181818	0.00340136	0	0.00184843	0	0	0.00813008	0
[agct]{0,1}agtg	0.00340136	0.00434783	0.00739372	0.00714286	0.0175439	0	0.0181818	0	0	0.00184843	0	0	0	0
gc[agct]{0,1}cc	0.0238095	0.0304348	0.00554529	0.00714286	0	0	0	0.0204082	0.00869565	0.00554529	0.0214286	0	0	0
gc[agct]{0,1}ca	0.0170068	0.0217391	0.00924214	0.00714286	0	0.00813008	0	0	0.00869565	0	0.00714286	0	0	0
[agct]{0,1}agtc	0.00680272	0.00869565	0.00369686	0.00714286	0	0	0	0.00680272	0	0.00184843	0	0	0	0.0181818
ac[agct]{0,3}	0.0442177	0.0565217	0.064695	0.0357143	0.0175439	0.0569106	0.0363636	0.047619	0.0391304	0.064695	0.0714286	0.0526316	0.0813008	0.0545455
[agct]{0,1}agta	0	0	0.00554529	0	0	0	0	0	0.00434783	0.00739372	0	0	0.00813008	0
[agct]{0,2}att	0	0	0.012939	0	0.0175439	0.0325203	0.0181818	0	0.00434783	0.0147874	0	0	0	0.0181818
[agct]{0,1}aagt	0	0	0.00924214	0	0	0	0.0181818	0	0	0.00739372	0	0	0.0243902	0.0181818
t[agct]{0,1}gct	0	0	0.00369686	0	0.0175439	0.00813008	0	0	0.00434783	0.00184843	0	0	0.00813008	0
[agct]{0,2}atg	0.00340136	0.00434783	0.0184843	0	0.0175439	0	0.0181818	0	0.0130435	0.0166359	0	0.0175439	0.0162602	0
[agct]{0,1}aagg	0.00340136	0.00434783	0.00924214	0	0.0350877	0	0	0.00340136	0	0.00184843	0	0.0175439	0	0
[agct]{0,2}atc	0.00340136	0.00434783	0.00739372	0.00714286	0.0175439	0	0	0.00340136	0.0130435	0.0110906	0.00714286	0.0175439	0.00813008	0.0181818
[agct]{0,1}aagc	0.00340136	0.00434783	0.00554529	0	0	0.00813008	0	0	0.0130435	0.00184843	0	0	0.00813008	0.0181818
[agct]{0,2}ata	0	0	0.0166359	0	0	0.00813008	0	0	0.00434783	0.012939	0	0.0175439	0.0162602	0
t[agct]{0,1}gcg	0.00680272	0.00869565	0	0	0	0	0	0	0.00869565	0.00184843	0	0	0	0
[agct]{0,1}aaga	0.00340136	0.00434783	0.00184843	0.00714286	0	0.0162602	0	0.00340136	0.0130435	0.00739372	0	0	0	0
t[agct]{0,1}gcc	0.00680272	0.00869565	0	0	0	0.00813008	0	0.00680272	0.00869565	0.00184843	0	0	0.00813008	0
t[agct]{0,1}gca	0	0	0.0110906	0	0	0	0.0181818	0.00340136	0.00869565	0.00739372	0	0	0	0
gc[agct]{0,1}at	0	0	0.00369686	0	0	0.00813008	0	0	0	0	0	0	0	0
c[agct]{0,3}t	0.047619	0.0608696	0.0739372	0.0357143	0.0701754	0.0406504	0.0181818	0.0442177	0.0304348	0.0720887	0.0642857	0.105263	0.0569106	0.0727273
aaga[agct]{0,1}	0.00340136	0.00434783	0.00184843	0.00714286	0	0.0162602	0	0.00340136	0.0130435	0.00739372	0	0	0	0
gaca[agct]{0,1}	0	0	0.00369686	0	0	0	0	0.00340136	0	0.00554529	0	0	0	0
[agct]{0,1}ccct	0.0102041	0.0130435	0.00554529	0	0.0175439	0	0	0.0102041	0	0.00739372	0.0214286	0.0350877	0	0
gc[agct]{0,1}ag	0.00340136	0.00434783	0.00554529	0	0	0	0	0.00680272	0.00434783	0.00554529	0	0	0	0.0181818
c[agct]{0,3}g	0.142857	0.182609	0.0536044	0.128571	0.0350877	0.0487805	0.0909091	0.142857	0.0782609	0.0536044	0.128571	0.0350877	0.0487805	0.0909091
gc[agct]{0,1}ac	0	0	0.00369686	0	0	0.00813008	0	0.00680272	0	0.00184843	0	0.0175439	0.00813008	0.0181818
gc[agct]{0,1}aa	0.00680272	0.00869565	0	0	0	0	0	0	0.0130435	0.00739372	0	0	0.00813008	0
c[agct]{0,3}c	0.139456	0.178261	0.0425139	0.0571429	0.0175439	0.0650407	0.0181818	0.122449	0.0956522	0.0591497	0.157143	0.175439	0.0569106	0.0909091
[agct]{0,1}cccg	0.0136054	0.0173913	0.00184843	0.0142857	0	0	0	0.0238095	0.00869565	0	0.0285714	0	0	0
c[agct]{0,3}a	0.0442177	0.0565217	0.0443623	0.0214286	0.0526316	0.0487805	0.0363636	0.0340136	0.0652174	0.0443623	0.0571429	0.0526316	0.0813008	0.0363636
[agct]{0,1}cccc	0.0102041	0.0130435	0.00554529	0	0	0	0	0.0170068	0.0130435	0.00184843	0.05	0.0350877	0	0
[agct]{0,1}ccca	0.0136054	0.0173913	0.00184843	0	0	0.0162602	0	0.00680272	0.0130435	0.00369686	0	0	0.00813008	0
t[agct]{0,1}gat	0	0	0.00739372	0.00714286	0	0	0.0181818	0	0	0	0	0	0	0
acat[agct]{0,1}	0	0	0.00369686	0	0	0.00813008	0	0	0	0.00369686	0	0.0175439	0	0
[agct]{0,3}gt	0.047619	0.0608696	0.064695	0.0714286	0.0526316	0.0813008	0.0545455	0.0442177	0.0391304	0.064695	0.0357143	0.0175439	0.0569106	0.0363636
tg[agct]{0,1}ct	0.00340136	0.00434783	0.00554529	0	0.0175439	0	0	0	0.00434783	0.00369686	0.00714286	0	0.0162602	0
t[agct]{0,1}gag	0	0	0.00369686	0	0	0	0	0.00680272	0.00434783	0.00184843	0	0	0	0
cctt[agct]{0,1}	0.00340136	0.00434783	0.00184843	0	0.0175439	0	0	0.00340136	0.00434783	0.00924214	0	0.0350877	0	0
t[agct]{0,1}gac	0.00340136	0.00434783	0.00184843	0	0	0	0	0	0	0.00739372	0	0	0.00813008	0
[agct]{0,3}gg	0.129252	0.165217	0.0609982	0.178571	0.175439	0.0650407	0.109091	0.159864	0.0869565	0.0406654	0.0571429	0.0526316	0.0650407	0.0363636
t[agct]{0,1}gaa	0.0102041	0.0130435	0.00369686	0	0	0.00813008	0.0181818	0.00340136	0.00434783	0.00184843	0	0	0	0
tt[agct]{0,1}ct	0	0	0.012939	0	0	0.00813008	0.0181818	0	0.00434783	0.00739372	0	0	0.00813008	0.0181818
[agct]{0,3}gc	0.115646	0.147826	0.051756	0.0928571	0.0701754	0.0487805	0.0727273	0.115646	0.104348	0.051756	0.0928571	0.0701754	0.0487805	0.0545455
[agct]{0,3}ga	0.0510204	0.0652174	0.0499076	0.0642857	0.0877193	0.0406504	0.0727273	0.0544218	0.0695652	0.0573013	0.0571429	0.0350877	0.0325203	0.0181818
tg[agct]{0,1}cg	0.00340136	0.00434783	0	0.00714286	0	0	0	0.00340136	0	0.00369686	0	0	0	0
tg[agct]{0,1}cc	0.00680272	0.00869565	0.00184843	0	0	0.00813008	0	0.00680272	0.00869565	0.00554529	0	0	0.00813008	0
tg[agct]{0,1}ca	0.00340136	0.00434783	0.00739372	0	0	0	0.0181818	0.00340136	0.00434783	0.00739372	0	0	0	0.0181818
[agct]{0,1}ccat	0	0	0.00184843	0	0	0.00813008	0	0	0.00434783	0.00369686	0	0	0	0.0181818
tt[agct]{0,1}cg	0	0	0.00184843	0.00714286	0	0	0	0	0.00434783	0	0	0.0175439	0	0
tt[agct]{0,1}cc	0	0	0	0	0	0.00813008	0.0181818	0.00340136	0.0173913	0.00369686	0.00714286	0	0	0
tt[agct]{0,1}ca	0	0	0.00369686	0.0142857	0	0	0	0.00340136	0.00434783	0.0147874	0	0	0	0
[agct]{0,1}ccag	0.0136054	0.0173913	0.00184843	0	0	0	0	0.00340136	0.0130435	0.00739372	0	0.0175439	0	0.0181818
[agct]{0,1}gctt	0	0	0.00184843	0	0	0.00813008	0.0181818	0.00340136	0.00869565	0.00554529	0	0	0.00813008	0
[agct]{0,1}ccac	0.00680272	0.00869565	0.00369686	0	0	0.0243902	0	0.00680272	0.00434783	0.00554529	0.00714286	0.0175439	0	0.0181818
[agct]{0,1}ccaa	0.00340136	0.00434783	0	0	0	0.00813008	0	0.0102041	0.00434783	0.00184843	0	0	0.0243902	0
cgaa[agct]{0,1}	0.00680272	0.00869565	0.00184843	0	0	0	0	0.00340136	0.00869565	0	0.0142857	0	0	0
[agct]{0,1}aact	0.00680272	0.00869565	0.00369686	0	0	0.0162602	0	0.00340136	0	0.00739372	0	0	0.00813008	0.0181818
at[agct]{0,2}t	0	0	0.0110906	0	0	0.0162602	0	0	0.00434783	0.0184843	0	0	0	0.0181818
a[agct]{0,1}gtt	0	0	0.00554529	0	0	0	0.0181818	0	0	0.00554529	0	0	0.0162602	0
cgcg[agct]{0,1}	0.0102041	0.0130435	0	0.00714286	0	0	0.0181818	0.0102041	0.00434783	0	0.00714286	0	0	0.0181818
[agct]{0,1}gctg	0	0	0.00554529	0.00714286	0.0175439	0	0	0.00340136	0.00434783	0.00554529	0.0214286	0	0	0
ctaa[agct]{0,1}	0	0	0.00184843	0	0	0	0	0	0	0.00369686	0	0.0175439	0.00813008	0.0363636
ga[agct]{0,1}gt	0	0	0.00369686	0.00714286	0	0	0	0	0	0.00369686	0	0	0.0162602	0
taaa[agct]{0,1}	0	0	0.00554529	0	0	0.00813008	0.0181818	0	0	0.00554529	0.00714286	0	0.00813008	0
[agct]{0,1}gctc	0.0136054	0.0173913	0.00369686	0.0142857	0	0.00813008	0	0.00680272	0.00434783	0	0.00714286	0	0	0
[agct]{0,1}gcta	0	0	0.00554529	0	0	0	0	0.00680272	0	0.00369686	0	0	0	0
[agct]{0,1}aacg	0.00340136	0.00434783	0	0	0	0	0	0.00340136	0.00434783	0.00369686	0.0142857	0	0	0
at[agct]{0,2}g	0.00340136	0.00434783	0.00924214	0	0.0175439	0.0243902	0	0	0.00434783	0.0110906	0	0.0175439	0.0162602	0
a[agct]{0,1}gtg	0	0	0.00924214	0.0142857	0	0.00813008	0	0	0.00434783	0.00739372	0.00714286	0	0.0243902	0
tg[agct]{0,1}at	0	0	0.00554529	0	0.0175439	0	0.0181818	0	0	0.00184843	0	0	0	0
[agct]{0,1}aacc	0.00680272	0.00869565	0.00184843	0	0	0	0	0.00340136	0.00434783	0.00369686	0.0214286	0	0.00813008	0
ctcg[agct]{0,1}	0.00340136	0.00434783	0.00184843	0	0	0	0	0.00340136	0	0.00184843	0.00714286	0	0	0
tacg[agct]{0,1}	0	0	0.00184843	0	0.0175439	0	0	0	0	0	0	0	0	0
at[agct]{0,2}c	0	0	0.012939	0.00714286	0.0175439	0	0.0181818	0.00680272	0.0130435	0.00924214	0	0.0350877	0.0243902	0
[agct]{0,1}aaca	0	0	0.00554529	0.00714286	0	0	0	0	0.00434783	0.00739372	0.00714286	0	0.0243902	0
a[agct]{0,1}gtc	0	0	0.00184843	0	0	0.00813008	0	0	0.00434783	0	0.00714286	0	0	0.0181818
at[agct]{0,2}a	0	0	0.0221811	0	0.0175439	0	0.0181818	0	0.0130435	0.0166359	0.00714286	0.0175439	0	0.0181818
a[agct]{0,1}gta	0	0	0.00554529	0	0.0175439	0	0	0	0	0.00554529	0	0	0.00813008	0
tc[agct]{0,3}	0.0544218	0.0695652	0.0573013	0.0571429	0.0350877	0.0325203	0.0181818	0.0510204	0.0434783	0.0499076	0.0642857	0.0877193	0.0406504	0.0727273
ga[agct]{0,1}gg	0.0102041	0.0130435	0.00184843	0.0214286	0.0350877	0	0	0	0.00869565	0.00554529	0	0.0175439	0	0
ga[agct]{0,1}gc	0.00340136	0.00434783	0.00554529	0	0	0.00813008	0.0181818	0	0.00434783	0.00369686	0.00714286	0	0	0
tt[agct]{0,1}at	0	0	0.00554529	0.00714286	0	0	0	0	0	0.00554529	0	0	0	0
a[agct]{0,1}agt	0	0	0.0110906	0	0.0175439	0	0.0181818	0.00340136	0	0.00184843	0	0	0.0162602	0
ga[agct]{0,1}ga	0.00340136	0.00434783	0.00184843	0.00714286	0	0.00813008	0	0.00340136	0.00434783	0.00369686	0	0	0	0
gc[agct]{0,3}	0.115646	0.147826	0.051756	0.0928571	0.0701754	0.0487805	0.0545455	0.115646	0.104348	0.051756	0.0928571	0.0701754	0.0487805	0.0727273
tg[agct]{0,1}ag	0.00340136	0.00434783	0	0.00714286	0	0.00813008	0	0.00340136	0.00869565	0.00554529	0	0.0175439	0	0
tg[agct]{0,1}ac	0.00340136	0.00434783	0.00554529	0	0	0.00813008	0	0.00340136	0.00869565	0.00924214	0	0	0.00813008	0
tg[agct]{0,1}aa	0.00340136	0.00434783	0.0147874	0	0	0	0	0	0.00434783	0.00369686	0.0142857	0	0	0
tt[agct]{0,1}ag	0	0	0.00554529	0.00714286	0.0175439	0.00813008	0	0.00340136	0	0.00369686	0	0	0.00813008	0.0181818
a[agct]{0,1}agg	0	0	0.00924214	0.00714286	0	0.00813008	0	0.00340136	0.00434783	0.00554529	0	0	0	0
[agct]{0,2}ttt	0	0	0.0406654	0.0285714	0	0.0487805	0.0181818	0	0.0173913	0.0314233	0	0	0.0243902	0.0727273
[agct]{0,1}atgt	0	0	0.00369686	0	0.0175439	0	0	0	0	0.00369686	0	0	0.00813008	0
accc[agct]{0,1}	0.00340136	0.00434783	0.00554529	0.00714286	0	0	0	0.0136054	0	0.00739372	0.00714286	0	0	0
tt[agct]{0,1}ac	0.00340136	0.00434783	0.00739372	0.00714286	0	0	0	0	0	0.0110906	0	0	0	0
a[agct]{0,1}agc	0	0	0.00369686	0.00714286	0	0	0	0	0.0130435	0.00184843	0	0	0.00813008	0
tt[agct]{0,1}aa	0	0	0.00554529	0	0	0.0162602	0.0181818	0	0	0.00554529	0	0	0.0162602	0.0181818
a[agct]{0,1}aga	0.00340136	0.00434783	0.00184843	0.0142857	0	0.00813008	0	0	0.0130435	0.00554529	0	0	0	0
[agct]{0,2}ttg	0.0102041	0.0130435	0.0166359	0.00714286	0	0.0731707	0	0.00680272	0.0173913	0.0166359	0	0	0.00813008	0
[agct]{0,1}atgg	0	0	0.00369686	0	0	0	0.0181818	0	0.00869565	0.00184843	0	0	0.00813008	0
ggac[agct]{0,1}	0	0	0.00369686	0	0	0	0.0363636	0.0102041	0.00434783	0.00184843	0	0	0.00813008	0
[agct]{0,2}ttc	0.00680272	0.00869565	0.0221811	0.0285714	0.0175439	0.00813008	0.0181818	0.0238095	0.00869565	0.0203327	0.0142857	0.0350877	0.0243902	0.0181818
[agct]{0,1}atgc	0	0	0.00369686	0	0	0	0	0	0.00434783	0.00554529	0	0.0175439	0	0
[agct]{0,1}tcgt	0	0	0.00369686	0	0	0	0	0	0	0.00184843	0	0	0	0
[agct]{0,2}tta	0	0	0.0147874	0.00714286	0.0175439	0.0243902	0.0545455	0	0	0.0147874	0	0	0.00813008	0.0181818
[agct]{0,1}aaat	0	0	0.00554529	0	0	0	0.0181818	0	0.00869565	0.00924214	0	0	0.0162602	0.0181818
[agct]{0,1}atga	0	0	0.00739372	0	0	0	0	0	0	0.00554529	0	0	0	0
tcac[agct]{0,1}	0.00680272	0.00869565	0.00739372	0.00714286	0	0	0	0.00340136	0	0.00184843	0.00714286	0	0	0
gtac[agct]{0,1}	0	0	0.00369686	0	0.0175439	0.00813008	0	0	0	0.00369686	0	0.0175439	0.00813008	0
[agct]{0,3}ct	0.0578231	0.073913	0.0628466	0.0285714	0.0350877	0.0487805	0.0545455	0.0578231	0.0434783	0.0683919	0.0928571	0.0877193	0.0569106	0.0909091
[agct]{0,1}tcgg	0	0	0.00184843	0.0142857	0	0	0	0.00340136	0	0.00369686	0.00714286	0	0	0
[agct]{0,1}aaag	0	0	0.00924214	0	0	0.00813008	0.0181818	0	0.0173913	0.00554529	0	0	0.0162602	0
ag[agct]{0,1}tt	0	0	0.00184843	0	0	0.00813008	0	0	0.00869565	0.00369686	0	0	0.0162602	0
[agct]{0,1}tcgc	0	0	0	0	0	0	0	0.00340136	0.00434783	0.00184843	0	0	0	0
cac[agct]{0,2}	0.0204082	0.026087	0.0295749	0.0142857	0	0.0325203	0	0.0136054	0.0173913	0.0184843	0.0214286	0.0175439	0.0243902	0.0363636
[agct]{0,1}aaac	0	0	0.00184843	0	0	0.0162602	0	0	0	0.00739372	0.0285714	0	0.0162602	0
[agct]{0,1}tcga	0.00680272	0.00869565	0	0	0	0	0	0.00680272	0	0	0	0	0	0
[agct]{0,1}aaaa	0	0	0.0147874	0	0	0	0.0363636	0	0.00434783	0.0184843	0	0	0	0
cgc[agct]{0,1}t	0.00340136	0.00434783	0.00369686	0	0.0175439	0	0	0	0	0.00369686	0.00714286	0.0175439	0	0.0181818
[agct]{0,3}cg	0.108844	0.13913	0.025878	0.1	0.0526316	0.0243902	0.0363636	0.108844	0.0565217	0.025878	0.1	0.0526316	0.0243902	0.0363636
at[agct]{0,1}tt	0	0	0.00184843	0	0	0.00813008	0	0	0	0.00739372	0	0	0	0.0181818
ag[agct]{0,1}tg	0	0	0.012939	0	0	0	0	0.00680272	0.00434783	0.00924214	0.00714286	0	0	0
[agct]{0,3}cc	0.159864	0.204348	0.0406654	0.0571429	0.0526316	0.0650407	0.0181818	0.132653	0.1	0.0591497	0.178571	0.175439	0.0650407	0.0909091
caat[agct]{0,1}	0	0	0.00554529	0	0	0	0	0	0	0	0	0	0.0162602	0
ctc[agct]{0,1}t	0	0	0.00369686	0	0	0	0	0.00340136	0	0.00369686	0.00714286	0	0.00813008	0
[agct]{0,3}ca	0.047619	0.0608696	0.0850277	0.0571429	0.0350877	0.0650407	0.0181818	0.047619	0.0826087	0.0739372	0.0428571	0.0526316	0.0894309	0.0545455
ag[agct]{0,1}tc	0.00680272	0.00869565	0.00184843	0.00714286	0	0	0	0.00340136	0.00434783	0	0	0	0	0
cgc[agct]{0,1}g	0.0136054	0.0173913	0	0.0142857	0.0175439	0	0.0181818	0.0136054	0	0	0.0214286	0	0	0
ag[agct]{0,1}ta	0	0	0.00369686	0	0	0	0.0181818	0	0	0	0	0	0	0
cgc[agct]{0,1}c	0.0306122	0.0391304	0	0.00714286	0	0	0	0.00340136	0.00869565	0	0.00714286	0	0	0
actt[agct]{0,1}	0	0	0.00739372	0	0	0.0243902	0.0181818	0	0.00434783	0.00924214	0	0	0	0.0181818
at[agct]{0,1}tg	0	0	0.00184843	0	0	0.0162602	0	0	0	0.00184843	0	0	0.0162602	0
cgc[agct]{0,1}a	0	0	0.00184843	0	0	0	0	0.00680272	0.00434783	0	0	0	0	0
tcc[agct]{0,2}	0.0306122	0.0391304	0.00739372	0.00714286	0.0175439	0.0243902	0.0181818	0.0170068	0.0217391	0.0184843	0.0142857	0.0526316	0.0162602	0.0545455
at[agct]{0,1}tc	0	0	0.00369686	0	0	0	0.0181818	0	0.00434783	0.00184843	0	0.0175439	0	0
ctc[agct]{0,1}g	0.0102041	0.0130435	0.00554529	0.0214286	0	0.00813008	0	0.00680272	0.00434783	0.00184843	0.0142857	0.0175439	0.00813008	0
at[agct]{0,1}ta	0	0	0.00924214	0	0.0175439	0	0	0	0	0.00369686	0	0	0	0
acgt[agct]{0,1}	0	0	0.00369686	0.0142857	0	0.0162602	0	0	0.00434783	0.00369686	0.0142857	0	0.0162602	0
gcct[agct]{0,1}	0.00340136	0.00434783	0.00184843	0.00714286	0	0	0	0	0.0173913	0.00369686	0.00714286	0.0175439	0.0243902	0
ctc[agct]{0,1}c	0.00680272	0.00869565	0.00184843	0	0	0.00813008	0	0.00680272	0.00434783	0.00184843	0.0214286	0.0175439	0	0
ctc[agct]{0,1}a	0.00680272	0.00869565	0.00184843	0	0	0	0	0	0	0.00369686	0	0	0	0
t[agct]{0,1}ctt	0.00340136	0.00434783	0.012939	0	0	0.00813008	0.0181818	0	0	0.00739372	0	0	0.00813008	0
c[agct]{0,1}cgt	0.00340136	0.00434783	0.00369686	0.00714286	0	0.0162602	0	0.00340136	0.00434783	0.00369686	0.0142857	0	0.00813008	0.0181818
ga[agct]{0,1}ct	0.00340136	0.00434783	0	0	0	0	0	0.00680272	0	0.00184843	0.00714286	0	0	0
acag[agct]{0,1}	0.00340136	0.00434783	0.012939	0.00714286	0	0	0	0.00680272	0	0.00369686	0	0	0	0
[agct]{0,3}at	0.00680272	0.00869565	0.0554529	0.00714286	0.0701754	0.0406504	0.0363636	0.00340136	0.0347826	0.0554529	0.00714286	0.0526316	0.0406504	0.0363636
t[agct]{0,1}ctg	0.00340136	0.00434783	0.00369686	0	0	0	0.0181818	0.00680272	0.00434783	0.00924214	0	0	0	0.0181818
c[agct]{0,1}cgg	0.0102041	0.0130435	0.00184843	0.00714286	0	0	0.0181818	0.0340136	0.00869565	0	0.0214286	0	0	0
cc[agct]{0,2}t	0.0238095	0.0304348	0.012939	0.00714286	0.0175439	0	0.0181818	0.0170068	0.00434783	0.0184843	0.0214286	0.0701754	0.0162602	0.0181818
t[agct]{0,1}ctc	0	0	0.00924214	0	0	0.00813008	0	0	0	0.00369686	0	0	0	0
c[agct]{0,1}cgc	0.0170068	0.0217391	0	0.0142857	0	0	0	0.00340136	0.00434783	0.00184843	0.0214286	0	0	0
t[agct]{0,1}cta	0	0	0.00554529	0	0	0	0	0.00340136	0	0.00369686	0	0	0	0.0363636
c[agct]{0,1}cga	0.00340136	0.00434783	0.00369686	0	0	0	0	0	0.00434783	0	0	0	0	0
ga[agct]{0,1}cg	0.00680272	0.00869565	0	0	0	0	0	0.00680272	0.00434783	0	0.00714286	0	0	0
[agct]{0,3}ag	0.0578231	0.073913	0.0702403	0.0928571	0.0877193	0.0569106	0.0727273	0.0578231	0.0869565	0.0628466	0.0285714	0.0350877	0.0487805	0.0545455
cctg[agct]{0,1}	0.0102041	0.0130435	0.00184843	0	0	0	0.0181818	0.00340136	0.00869565	0.00554529	0.00714286	0	0.00813008	0.0181818
ga[agct]{0,1}cc	0.0102041	0.0130435	0.00184843	0.00714286	0.0175439	0	0	0.0136054	0.00869565	0.00369686	0.00714286	0.0175439	0	0
[agct]{0,3}ac	0.0442177	0.0565217	0.064695	0.0357143	0.0175439	0.0569106	0.0363636	0.047619	0.0391304	0.0665434	0.0714286	0.0526316	0.0731707	0.0545455
a[agct]{0,1}act	0.00340136	0.00434783	0	0	0	0.0162602	0	0.00340136	0	0.00369686	0.00714286	0	0.00813008	0
ga[agct]{0,1}ca	0	0	0.00184843	0.0142857	0	0	0	0.00340136	0.00869565	0.00739372	0.00714286	0	0.00813008	0
[agct]{0,3}aa	0.0306122	0.0391304	0.0831793	0.00714286	0.0175439	0.0487805	0.109091	0.0204082	0.0782609	0.0942699	0.0571429	0.0350877	0.146341	0.0909091
cc[agct]{0,2}g	0.0680272	0.0869565	0.00184843	0.0214286	0	0.0162602	0.0181818	0.0510204	0.0304348	0.0147874	0.05	0	0	0.0363636
